# Supplementary material for: Theoretical study of the OH-initiated atmospheric oxidation mechanism of perfluoro methyl vinyl ether, CF3OCFCF2
Source: Royal Society of Chemistry journal article supplement (doi:10.1039/c5cp04839g), 2015-01-01
Supplement: c5cp04839g1.pdf [file c5cp04839g1.pdf]

# Theoretical study of the OH-initiated atmospheric oxidation mechanism of perfluoro methyl vinyl ether, $\text{CF}_3\text{OCF}=\text{CF}_2$

– Supporting Information –

L.Vereecken, J. N. Crowley, D. Amedro

## Table of content

|    |                                                                                                                                                                                                                |
|----|----------------------------------------------------------------------------------------------------------------------------------------------------------------------------------------------------------------|
| 2  | Figure SI-1                                                                                                                                                                                                    |
| 3  | Figure SI-2                                                                                                                                                                                                    |
| 4  | CCSD(T) <i>ab initio</i> calculations                                                                                                                                                                          |
| 6  | Table SI-1                                                                                                                                                                                                     |
| 7  | Rate coefficient predictions                                                                                                                                                                                   |
| 8  | Figure SI-3                                                                                                                                                                                                    |
| 10 | Quantum chemical data on $\text{CF}_3\text{OCFCF}_2 + \text{OH}$ , M06-2X/cc-pVDZ level of theory                                                                                                              |
| 35 | Quantum chemical data on $\text{CF}_3\text{OCFCF}_2 + \text{OH}$ , M06-2X/aug-cc-pVTZ level of theory, including single points calculations at CCSD(T)/6-311++G(d,p) and CCSD(T)/aug-cc-pVDZ levels of theory. |
| 70 | Quantum chemical data on $\text{CF}_3\text{CFCF}_2 + \text{OH}$ , M06-2X/cc-pVDZ level of theory                                                                                                               |
| 72 | Quantum chemical data on $\text{CF}_3\text{OCFCF}_2 + \text{Cl}$ , M06-2X/cc-pVDZ level of theory                                                                                                              |

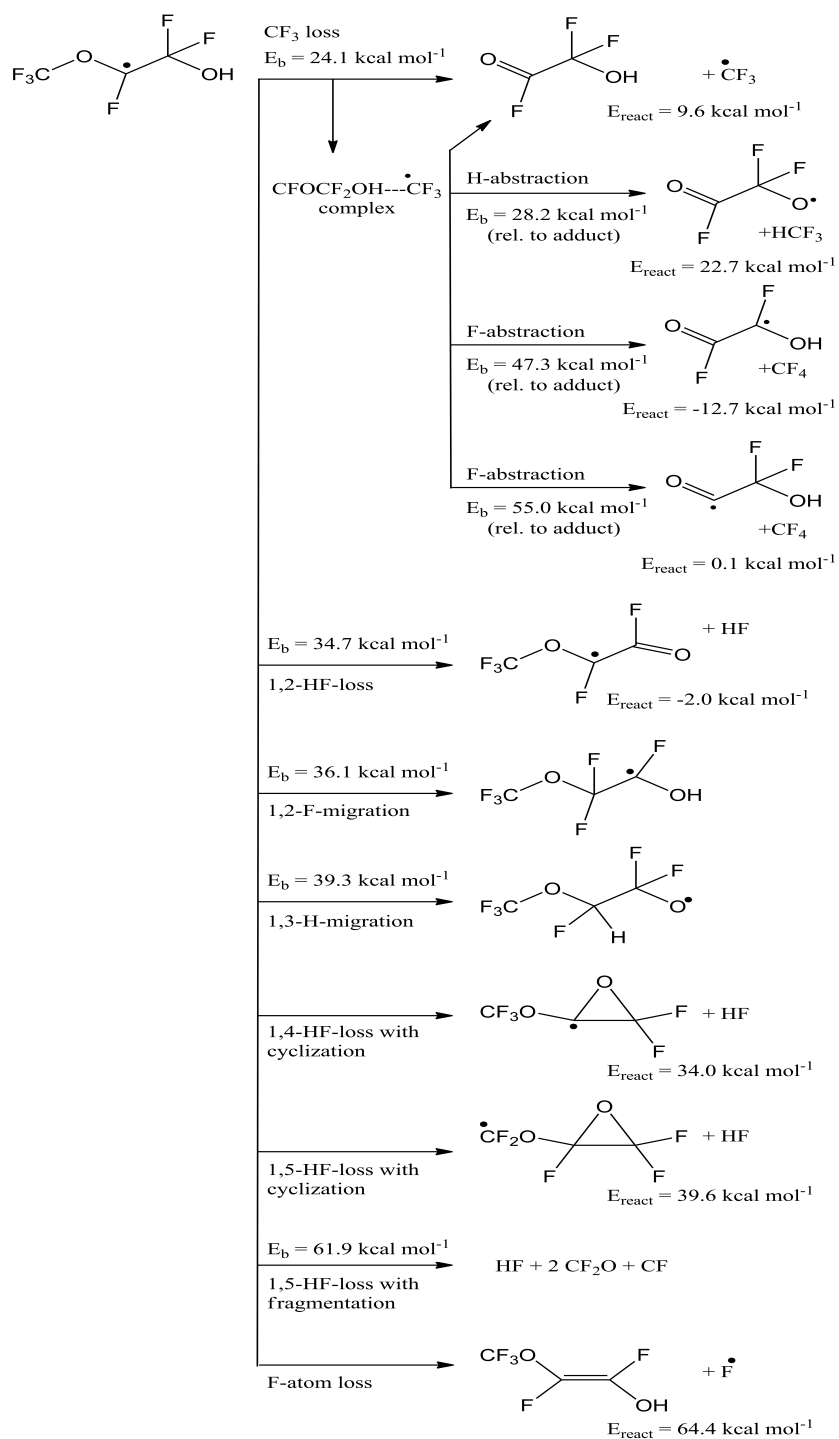

Figure SI - 1: All pathways considered for the main adduct, at the M06-2X/aug-cc-pVTZ level of theory.

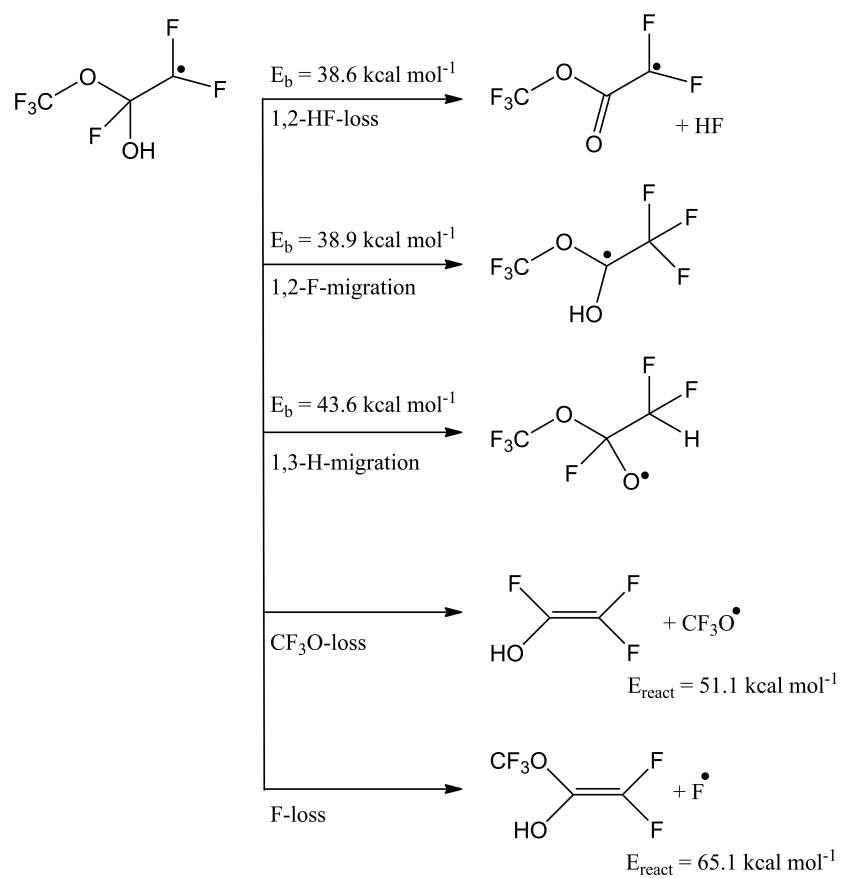

Figure SI - 2: All pathways considered for the minor adduct, at the M06-2X/aug-cc-pVTZ level of theory.

## CCSD(T) *ab initio* calculations

To assess the robustness of the M06-2X/aug-cc-pVTZ calculations, we compared these against single point energy calculations at the CCSD(T)/6-311++G(d,p), CCSD(T)/aug-cc-pVDZ, and CCSD(T)-F12a/aug-cc-pVDZ levels of theory (see Table SI-1); the raw data on all compounds discussed in the paper are listed further in this supporting information. The CCSD(T) calculations were obtained using Gaussian-09, the CCSD(T)-F12 results with Molpro 2010.1. While these calculations are based on coupled cluster theory, they are not *a priori* more reliable than the M06-2X calculations, as the CC predictions still carry uncertainties of several kcal/mol due to the small size of the basis set, which limits the flexibility in accounting for electron correlation. 6-311++G(d,p) and aug-cc-pVDZ basis sets are similar in size, where the first basis set is rather small but reasonably balanced due to its use of split valence orbitals, while the latter has ~20% more Gaussian primitives and is part of a systematic series of basis sets that allows for extrapolation to the complete basis set. For basis sets of this size, errors on absolute CCSD(T) atomization energies are reported of up to several tens of kcal/mol (see e.g. D. Feller, K. A. Peterson, J. Chem. Phys., 2007, 126, 114105 ; K. A. Peterson, D. Feller, D. A. Dixon, Theor. Chem. Acc., 2012, 131, 1079). Cancellation of error leads to *relative* energies that are significantly more reliable, but non-negligible uncertainties remain especially for free products/reactants or for barrier heights for bimolecular reactions, where the cancellation of error is least effective due to significant differences in bond types and bonding partners on either side of the chemical equation. For example, the predicted relative energy of some sets of products differs as much as 7 kcal mol<sup>-1</sup> among the CC levels of theory, despite using the same geometry and a similarly sized basis set. For the unimolecular reactions listed in Table SI-1, the average unsigned difference (MUE) between the M06-2X barrier height and the CCSD(T)/6-311++G(d,p) barrier height is 2.5 kcal/mol, against CCSD(T)/aug-cc-pVDZ it is 2.1 kcal/mol. In these values, the “CF<sub>3</sub>OC\*FCF<sub>2</sub>OH 1,5-HF-loss with fragmentation” reaction (see figure SI-1) has a disproportionate impact; it leads to 4 fragments in a single decomposition TS and thus represents an extreme change in bonding. Without this reaction M06-2X and CCSD(T) with a small basis set agree on average within ~2 kcal/mol on the barrier heights.

Preferably one would use larger basis sets in the coupled cluster calculations, such as aug-cc-pVTZ and beyond, and extrapolate the energies to the basis set limit. Unfortunately, with up to 12 non-hydrogen atoms and open shell wave functions, these calculations are beyond our computational capabilities. CCSD(T)-F12 explicitly correlated methodologies converge significantly faster to the complete basis set limit, but CCSD(T)-F12/aug-cc-pVDZ still shows sizable uncertainties even when these are up to an order of magnitude smaller than for traditional CCSD(T) calculations with a similar small basis set (See e.g. Peterson et al., 2012). Also, such calculations again strain our computational resources to the maximum, and we had to limit our calculations to the smaller fragments, and a few select reactions. Composite methods, such as G2, G3SX or CBS-QB3, have reported uncertainties of a few kcal/mol, and are likewise not a sufficient improvement over the current set of data to warrant the computational cost. Reaching chemical accuracy, i.e. with uncertainties of 1 kcal/mol, is thus computationally too costly, while more tractable calculations do not result in a meaningful increase in

the *a priori* reliability compared to the results reported here. As such, we consider higher level calculations than those considered here or available in the literature to be beyond our reach at this time.

As argued in the main paper, however, our analysis of the reaction mechanism driving the  $\text{CF}_3\text{OCF}=\text{CF}_2 + \text{OH}$  reaction is not sensitive even to large uncertainties of several kcal/mol on the energy predictions, due to the sizable energy differences predicted for competing channels. Comparing M06-2X and CCSD(T) results for the critical points on the potential energy surface, we conclude that :

- The relative energy of the addition transition states indicates that the OH-addition to the outer carbon has an energetic advantage, and is expected to be the main entrance channel with a contribution of  $80\pm 15\%$  (see below).
- The energy of the addition transition states is below the energy of the separated reactants, allowing for a negative temperature-dependence of the rate coefficient (see below). Protruding barriers for addition would lead to rate coefficients that are significantly lower than the experimental values, and are considered unlikely.
- The  $\text{CF}_3$  loss channel is the only reaction channel for the adducts that has a sufficiently low barrier to allow for prompt decomposition at 1 atm. The HF elimination channel has a significantly higher barrier and concomitantly a negligible contribution.
- The reaction mechanism proposed earlier by Li et al. and Mashino et al., i.e. leading to formation of glyoxal directly by a process of HF elimination and C–O bond scission in the alkoxy radicals subsequently formed, is not viable as several steps in this mechanism have competing reactions with significantly lower energy barriers.
- The products of the reaction are predicted to be (per)fluorinated methylformate, glycolaldehyde, and formaldehyde. Direct glyoxal formation is unsupported by the available theoretical data, and glyoxal is predicted to be a secondary product.
- An *a priori* estimation of the yield of prompt decomposition has only limited reliability due to the uncertainties on the collisional energy transfer parameters. A yield of  $\sim 40\%$  prompt decomposition by  $\text{CF}_3$  loss from the  $\text{CF}_3\text{OC}\cdot\text{FCF}_2\text{OH}$  radical can be reproduced using physically viable collisional parameters. A significant yield of HF-loss from the initial adducts requires physically highly unlikely collision characteristics, as well as the removal of the  $\text{CF}_3$  loss channel from the calculations.

These main conclusions of the paper are thus supported in full within the uncertainties of the theoretical calculations available at this time, *i.e.* in the current paper and in the cited literature.

Table SI-1 : Barrier heights or (in brackets) reaction energies for critical reactions in the  $CF_3OCFCF_2 + OH$  reaction. The table is subdivided in sections corresponding to Figures 1 through 3 (main text), Figures SI-1 and SI-2 (supporting information), and miscellaneous reactions. The table compares the energies obtained using M06-2X/aug-cc-pVTZ (designated as M06-2X), CCSD(T)/6-311+G(d,p)//M06-2X (CC/311), CCSD(T)/aug-cc-pVDZ//M06-2X (CC/aVDZ), and ROHF-UCCSD(T)-F12a/aug-cc-pVDZ//M06-2X (CCF12/aVDZ).

| Reaction                                            | M06-2X | CC/311 | CC/aVDZ | CCF12/aVDZ |              |
|-----------------------------------------------------|--------|--------|---------|------------|--------------|
| $CF_3OC^*FCFO : CF_3$ loss                          | 30.1   | 25.1   | 25.8    | 29.8       | Figure 1     |
| $CF_3OCF(O^*)CFO : OCF_3$ loss                      | 17.8   | 13.8   | 14.1    |            |              |
| $CF_3OCF(O^*)CFO : F$ -loss                         | 24.2   | 24.9   | 24.4    |            |              |
| $CF_3OCF(O^*)CFO : FCO$ loss                        | 0.29   | 2.0    | 3.7     |            |              |
| $CFOCF_2OH : 1,2$ -HF-loss                          | 45.5   | 44.6   | 43.0    | 48.0       |              |
| $CF_3OCF=CF_2 + ^*OH \rightarrow CF_3OC^*F-CF_2OH$  | -2.1   | -0.03  | -2.1    |            | Figure 2     |
| $CF_3OC^*FCF_2OH : CF_3$ -loss                      | 24.1   | 21.4   | 22.1    |            |              |
| $CF_3OC^*FCF_2OH : 1,2$ -HF-loss                    | 34.7   | 35.6   | 34.0    |            |              |
| $CF_3OC^*F(O^*)CF_2OH : F$ -loss                    | 26.4   | 20.6   | 20.4    |            |              |
| $CF_3OC^*F(O^*)CF_2OH : OCF_3$ loss                 | 19.5   | 15.1   | 15.2    |            |              |
| $CF_3OC^*F(O^*)CF_2OH : CF_2OH$ loss                | < 1.5  | < 1.5  | < 1.5   |            |              |
| $CF_3OCF=CF_2 + ^*OH \rightarrow CF_3OCFOH-C^*F_2$  | -1.5   | 1.2    | -1.3    |            | Fig. 3       |
| $CF_3OCFOHC^*F_2 : 1,2$ -HF-loss                    | 38.6   | 39.6   | 37.9    |            |              |
| $CF_3OC^*FCF_2OH : CF_3$ loss                       | 24.1   | 21.4   | 22.1    |            | Figure SI-1  |
| $CF_3OC^*FCF_2OH : 1,2$ -HF-loss                    | 34.7   | 35.6   | 34.0    |            |              |
| $CF_3OC^*FCF_2OH : 1,2$ -F-migration                | 36.1   | 37.1   | 35.7    |            |              |
| $CF_3OC^*FCF_2OH : 1,3$ -H-migration                | 39.3   | 37.5   | 36.7    |            |              |
| $CF_3OC^*FCF_2OH : 1,4$ -HF-loss with cyclization   | (34.0) | (30.0) | (33.9)  |            |              |
| $CF_3OC^*FCF_2OH : 1,5$ -HF-loss with cyclization   | (39.6) | (35.6) | (39.8)  |            |              |
| $CF_3OC^*FCF_2OH : 1,5$ -HF-loss with fragmentation | 61.9   | 53.6   | 55.6    |            |              |
| $CF_3OC^*FCF_2OH : F$ -atom loss                    | (64.4) | (57.3) | (60.5)  |            |              |
| $CF_3OCFOHC^*F_2 : 1,2$ -HF-loss                    | 38.6   | 39.6   | 37.9    |            | Figure SI-2  |
| $CF_3OCFOHC^*F_2 : 1,2$ -F-migration                | 38.9   | 40.6   | 38.4    |            |              |
| $CF_3OCFOHC^*F_2 : 1,3$ -H-migration                | 43.6   | 41.9   | 41.0    |            |              |
| $CF_3OCFOHC^*F_2 : CF_3O$ -loss                     | (51.1) | (46.4) | (50.1)  |            |              |
| $CF_3OCFOHC^*F_2 : F$ -atom loss                    | (65.1) | (57.2) | (61.0)  |            |              |
| $CFOCF_2O^* : C-C$ scission                         | 0.97   | 3.1    | 4.3     | 2.4        | Misc. React. |
| $CFOCF_2OH \rightarrow H_2O : 1,2$ -HF-loss         | 14.4   | 15.6   | 12.8    | 15.0       |              |
| $CFOCF_2OH + ^*CF_3 \rightarrow CF_4 + CFOC^*FOH$   | 47.3   | 47.5   | 41.6    |            |              |
| $CFOCF_2OH + ^*CF_3 \rightarrow HCF_3 + CFOCF_2O^*$ | 28.2   | 20.6   | 21.8    |            |              |
| $CFOCF_2OH + ^*CF_3 \rightarrow CF_4 + OC^*CF_2OH$  | 55.0   | 47.2   | 47.8    |            |              |

## Rate coefficient predictions

Three experimental determination for the rate coefficient of the  $\text{CF}_3\text{OCF}=\text{CF}_2 + \text{OH}$  reaction are available in the literature :

$$\text{Li et al. : } k(253\text{-}348\text{K}) = (6.41 \pm 0.82) \times 10^{-11} \exp((-868 \pm 40)/T) \text{ cm}^3 \text{ molecule}^{-1} \text{ s}^{-1}$$

$$\text{Tokuhashi et al. : } k(250\text{-}430\text{K}) = (1.01 \pm 0.04) \times 10^{-12} \exp((320 \pm 10)/T) \text{ cm}^3 \text{ molecule}^{-1} \text{ s}^{-1}$$

$$\text{Mashino et al. : } k(296\text{K}) = (2.6 \pm 0.3) \times 10^{-12} \text{ cm}^3 \text{ molecule}^{-1} \text{ s}^{-1}$$

Near room temperature these rate coefficients differ by less than 30%, but the opposite sign of the temperature dependence for the expressions by Li et al. versus Tokuhashi et al. leads to larger differences at higher and lower temperatures.

The accurate prediction of the absolute rate coefficient of the  $\text{CF}_3\text{OCF}=\text{CF}_2 + \text{OH}$  reaction is difficult, as the value depends critically on the absolute barrier heights of the entrance transition states, on the interplay between the initial complex formation and the OH addition step, and on the description of the degrees of freedom for internal rotation, non-harmonic vibration, etc. along the addition process. Such complex calculations are beyond the scope of the current paper. Hence, we will not attempt a highly accurate prediction of the rate coefficient, but rather limit ourselves to assess the temperature dependence, and the relative contribution of the different entrance channels leading to addition on the inner or outer carbon atom.

To this end we performed simplified canonical transition state theory calculations (CTST), where we assume that (i) the formation and redissociation of the pre-reactive complex is fast enough compared to the addition reaction to ensure canonical equilibrium between the free reactants and the complex; (ii) that the impact of anharmonicities, internal rotation, etc. is sufficiently similar between all of the reactants, complex formation TS, complex, and the addition transition states, to mostly cancel out relative to a harmonic oscillator treatment; (iii) that the predicted relative energy of the two addition transition states is sufficiently accurate; (iv) that tunneling is negligible; and (v) that the addition reaction is irreversible.

If the approximations above hold, the impact of the pre-reactive complex cancels out of the rate equations, and the absolute rate coefficient can be predicted based on the rigid-rotor, harmonic oscillator approximation for reactants and addition transition states, where we use the M06-2X/aug-cc-pVTZ rovibrational and energetic characteristics. For OH we use the experimental spin-orbit splitting value of  $126.23 \text{ cm}^{-1}$  :

$$k(T) = \frac{k_b T}{h} \times \frac{Q^\ddagger(T)}{Q_{\text{CF}_3\text{OCFCF}_2(T)} \times Q_{\text{OH}}(T)} \times \exp\left(\frac{-E_b}{k_b T}\right)$$

Figure SI-3 shows the result of this calculation, compared to the available experimental data. The submerged barriers as predicted by M06-2X//aug-cc-pVDZ and CCSD(T)/aVDZ lead to a negative temperature dependence in fair agreement with the results of Tokuhashi et al., and in strong disagreement with the results of Li et al. The excellent level of agreement of the absolute rate

coefficients between theory and experiment must be considered fortuitous, in view of the uncertainties on the underlying data and the methodology used. Raising the barrier heights by only 0.4 kcal/mol is sufficient to shift our rate coefficient predictions below the  $k(T)$  values of Tokuhashi et al. and Mashino et al. To obtain a temperature-neutral rate coefficient, the barriers must be raised by 1.5 kcal/mol above the M06-2X values, while a positive temperature dependence similar to Li et al. requires barriers higher by 3.5 kcal/mol. The predicted  $k(T)$  in these latter two cases are found to be a factor of 10 to 350 below the experimental rate coefficient, respectively. Using the CCSD(T)/6-311++G(d,p) addition barrier heights, which are 2 to 2.7 kcal/mol higher than the M06-2X and CCSD(T)/aVDZ results, yields a nearly temperature-neutral  $k(T)$  that is a factor 25 below all experimental data.

The current rate analysis thus supports a negative temperature dependence, resulting from submerged barriers  $\sim 2$  kcal/mol below the free reactants. The predicted absolute rate coefficient carries an *a priori* uncertainty of at least a factor of 5, and we recommend the use of the  $k(T)$  expression by Tokuhashi et al. instead.

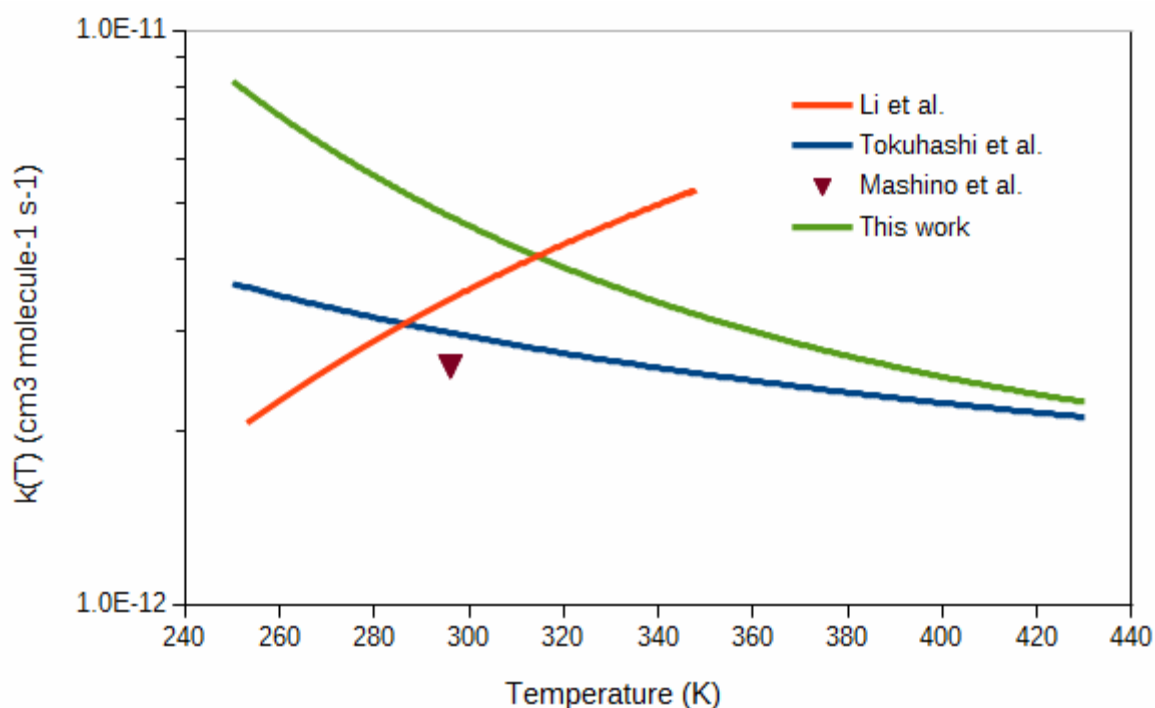

Figure SI-3 : Rate coefficients for the reaction of  $\text{CF}_3\text{OCF}=\text{CF}_2 + \text{OH}$  ( $\text{cm}^3 \text{ molecule}^{-1} \text{ s}^{-1}$ ), as reported in the literature, and as estimated in this work based on a rigid-rotor harmonic-oscillator CTST approximation using addition barrier heights of -2.1 and -1.5 kcal/mol relative to the free reactants, for addition on the outer and inner carbon atom, respectively.

The relative contribution of the two entrance channels can be estimated with fairly good accuracy, owing to the excellent error cancellation between the two addition transition states. The energy difference between the two TS at the M06-2X level of theory is 0.56 kcal/mol, leading to a ratio



of 83:17 at 300K for addition on the outer:inner carbon atom, using the RRHO approximation as detailed above, and changing only by ~4% absolute over the 240-400K T-range. Averaging the energy difference of the two TS over the levels of theory listed in Table SI-1 yields  $\Delta E=0.88$  kcal/mol, leading to a ratio of 88:12. We thus estimate a contribution of  $85\pm 15\%$  for addition on the outer carbon. The dominance of addition to the outer carbon is in agreement with literature data on OH addition on alkenes, where formation of the most substituted carbon radical is found to be favored. As discussed in the main text, the experimental observation of  $69\pm 8\%$  of glyoxal by Mashino et al. at 10 Torr can be interpreted as indicative of a ratio of ~70:30, which remains within the uncertainties of the enthalpy and entropy calculations in the current theoretical work.

## Quantum chemical data on reactants, products, and TS

\*\*\*\*\*  
CF3OCF=CF2 + OH : M06-2X/cc-pVDZ geometry  
\*\*\*\*\*

CF3

-----  
E(UM062X/CC-pVDZ) (Hartree): -337.47101834  
Electronic state : 2-A  
Cartesian coordinates (Angs):  
C -0.000124 -0.000500 0.328762  
F -1.104936 -0.593425 -0.073108  
F 1.066832 -0.659480 -0.073081  
F 0.038187 1.253238 -0.072987  
Rotational constants (GHz): 10.8935400 10.8810600 5.6380500  
Vibrational harmonic frequencies (cm-1):  
516.3667 517.5031 705.8909  
1128.4593 1335.8732 1337.8613  
Zero-point correction (Hartree): 0.012626

CF3O

-----  
E(UM062X/CC-pVDZ) (Hartree): -412.67717517  
Electronic state : 2-A  
Cartesian coordinates (Angs):  
C 0.006460 0.000842 0.035029  
F -0.779589 -1.067848 -0.006813  
F 0.850511 -0.027021 -0.989646  
F -0.766167 1.075572 -0.051728  
O 0.777306 0.021078 1.152939  
Rotational constants (GHz): 6.0538100 5.8749700 5.6235700  
Vibrational harmonic frequencies (cm-1):  
240.4554 418.9718 588.5250  
605.1949 631.2607 929.9720  
1282.4225 1310.5443 1349.1661  
Zero-point correction (Hartree): 0.016759

CFOCF2

-----  
E(UM062X/CC-pVDZ) (Hartree): -450.77929161  
Point group : CS  
Electronic state : 2-A"  
Cartesian coordinates (Angs):  
C -0.155187 -0.776621 0.000000  
C 0.000000 0.643315 0.000000  
F 1.039144 -1.385753 0.000000  
O -1.195392 -1.365263 0.000000  
F 1.152115 1.248269 0.000000  
F -1.025230 1.439922 0.000000  
Rotational constants (GHz): 5.6894300 3.4267300 2.1386300  
Vibrational harmonic frequencies (cm-1):  
132.1384 ( A'') 217.1530 ( A'') 220.6489 ( A')  
413.2745 ( A') 537.0718 ( A') 612.8043 ( A')  
644.8228 ( A'') 829.7127 ( A') 1174.1349 ( A')  
1467.7187 ( A') 1586.2871 ( A') 1848.7504 ( A')  
Zero-point correction (Hartree): 0.022063

CFOCF2OH

-----  
E(RM062X/CC-pVDZ) (Hartree): -526.65681872  
Electronic state : 1-A  
Cartesian coordinates (Angs):

```

C      -0.926111      0.130406      -0.008977
C      0.607752      0.021858      -0.004372
F      -1.509247     -1.052336     -0.016036
O      -1.519767      1.154825      0.003548
F      0.994365     -0.765495     -1.022032
F      0.969090     -0.614287      1.130834
O      1.186037      1.229197     -0.097212
H      0.492125      1.903303     -0.005491
Rotational constants (GHz):   3.8048500   2.5444800   2.0810400
Vibrational harmonic frequencies (cm-1):
  41.3475      212.8340      240.9736
 327.6125      404.0623      441.2731
 530.3607      614.9684      700.1705
 783.2171      837.9568     1117.0883
1217.7955      1280.0455     1375.8275
1485.0529      1983.0320     3779.6643
Zero-point correction (Hartree): 0.039579

```

CFOCFO

```

-----
E(RM062X/CC-pVDZ) (Hartree): -426.22630863
Point group : CS
Electronic state : 1-A'
Cartesian coordinates (Angs):
  C      0.000000      0.765117      0.000000
  C     -0.000037     -0.765141      0.000000
  O     -0.955673      1.453999      0.000000
  O      0.955652     -1.453890      0.000000
  F      1.243061      1.217279      0.000000
  F     -1.243018     -1.217360      0.000000
Rotational constants (GHz):   5.9645800   3.5797300   2.2371000
Vibrational harmonic frequencies (cm-1):
  66.6815 ( A'')      245.8273 ( A')      423.0977 ( A')
 457.7500 ( A'')      535.3851 ( A')      691.0305 ( A')
 835.6805 ( A'')      841.6858 ( A')     1189.9163 ( A')
1367.2170 ( A')      1997.2040 ( A')     2001.6342 ( A')
Zero-point correction (Hartree): 0.024270

```

CFO

```

-----
E(UM062X/CC-pVDZ) (Hartree): -213.03922496
Point group : CS
Electronic state : 2-A'
Cartesian coordinates (Angs):
  C      0.000000      0.423726      0.000000
  F     -1.012660     -0.432460      0.000000
  O      1.139243      0.168723      0.000000
Rotational constants (GHz):  186.9101500  11.5713600  10.8967600
Vibrational harmonic frequencies (cm-1):
  648.7703 ( A')      1106.6095 ( A')      1996.4126 ( A')
Zero-point correction (Hartree): 0.008547

```

F

```

-----
E(UM062X/CC-pVDZ) (Hartree): -99.69555398
Point group : OH
Cartesian coordinates (Angs):
  F      0.000000      0.000000      0.000000
Zero-point correction (Hartree): 0.000000

```

HF

```

-----
E(RM062X/CC-pVDZ) (Hartree): -100.40278281
Point group : C*v
Electronic state : 1-SG
Cartesian coordinates (Angs):
  F      0.000000      0.000000      0.092245
  H      0.000000      0.000000     -0.830203
Rotational constants (GHz):   0.0000000  620.5790284  620.5790284
Vibrational harmonic frequencies (cm-1):
  4129.9553 ( SG)

```

Zero-point correction (Hartree): 0.009409

O2

-----

E(UM062X/CC-pVDZ) (Hartree): -150.27726911

Point group : D\*H

Electronic state : 3-SGG

Cartesian coordinates (Angs):

|   |          |          |           |
|---|----------|----------|-----------|
| O | 0.000000 | 0.000000 | 0.595738  |
| O | 0.000000 | 0.000000 | -0.595738 |

Rotational constants (GHz): 0.0000000 44.5138317 44.5138317

Vibrational harmonic frequencies (cm-1):

1777.0525 ( SGG)

Zero-point correction (Hartree): 0.004048

OH

-----

E(UM062X/CC-pVDZ) (Hartree): -75.70046613

Point group : C\*V

Cartesian coordinates (Angs):

|   |          |          |           |
|---|----------|----------|-----------|
| O | 0.000000 | 0.000000 | 0.108808  |
| H | 0.000000 | 0.000000 | -0.870468 |

Rotational constants (GHz): 0.0000000 555.8514600 555.8514600

Vibrational harmonic frequencies (cm-1):

3717.8362 ( SG)

Zero-point correction (Hartree): 0.008470

FO2

-----

E(UM062X/CC-pVDZ) (Hartree): -249.97293613

Point group : CS

Electronic state : 2-A"

Cartesian coordinates (Angs):

|   |           |           |          |
|---|-----------|-----------|----------|
| F | -0.993949 | -0.608359 | 0.000000 |
| O | 0.000000  | 0.551603  | 0.000000 |
| O | 1.118193  | 0.132801  | 0.000000 |

Rotational constants (GHz): 80.6488800 11.3173200 9.9246100

Vibrational harmonic frequencies (cm-1):

419.2663 ( A') 663.7730 ( A') 1532.8411 ( A')

Zero-point correction (Hartree): 0.005959

CF4

-----

E(RM062X/CC-pVDZ) (Hartree): -437.38085819

Point group : CS

Electronic state : 1-A'

Cartesian coordinates (Angs):

|   |           |           |           |
|---|-----------|-----------|-----------|
| C | -0.000033 | 0.000063  | 0.000000  |
| F | -0.439754 | 1.243945  | 0.000000  |
| F | 1.319283  | -0.000044 | 0.000000  |
| F | -0.439754 | -0.621972 | 1.077250  |
| F | -0.439754 | -0.621972 | -1.077250 |

Rotational constants (GHz): 5.7310400 5.7308400 5.7304800

Vibrational harmonic frequencies (cm-1):

440.0897 ( A'') 440.1489 ( A') 636.6912 ( A')  
637.3753 ( A'') 637.7396 ( A') 943.4989 ( A')  
1358.9491 ( A') 1359.7896 ( A') 1359.8307 ( A'')

Zero-point correction (Hartree): 0.017802

HCF3

-----

E(RM062X/CC-pVDZ) (Hartree): -338.14538978

Electronic state : 1-A

Cartesian coordinates (Angs):

|   |           |           |           |
|---|-----------|-----------|-----------|
| C | 0.000092  | 0.000010  | 0.339330  |
| F | 0.905846  | -0.858935 | -0.128586 |
| F | 0.291058  | 1.213742  | -0.128692 |
| F | -1.196961 | -0.354893 | -0.128593 |
| H | -0.000033 | 0.000711  | 1.436860  |

Rotational constants (GHz): 10.3655400 10.3611000 5.6902300

Vibrational harmonic frequencies (cm-1):

|           |           |           |
|-----------|-----------|-----------|
| 516.8866  | 517.1093  | 710.5043  |
| 1174.9865 | 1225.7947 | 1226.5443 |
| 1420.4163 | 1420.7385 | 3178.1038 |

Zero-point correction (Hartree): 0.025951

FNO

-----  
E(RM062X/CC-pVDZ) (Hartree): -229.64021922  
Point group : CS  
Electronic state : 1-A'  
Cartesian coordinates (Angs):  
F -0.945958 -0.556648 0.000000  
N 0.000000 0.547666 0.000000  
O 1.064203 0.147021 0.000000  
Rotational constants (GHz): 97.1319400 12.5341900 11.1016100  
Vibrational harmonic frequencies (cm-1):  
606.1782 ( A') 865.1589 ( A') 1991.8551 ( A')  
Zero-point correction (Hartree): 0.007890

NO

-----  
E(UM062X/CC-pVDZ) (Hartree): -129.85561078  
Point group : C\*V  
Cartesian coordinates (Angs):  
N 0.000000 0.000000 -0.609646  
O 0.000000 0.000000 0.533441  
Rotational constants (GHz): 0.0000000 51.8018810 51.8018810  
Vibrational harmonic frequencies (cm-1):  
2101.9361 ( SG)  
Zero-point correction (Hartree): 0.004789

CF2O

-----  
E(RM062X/CC-pVDZ) (Hartree): -312.93589312  
Point group : C2V  
Electronic state : 1-A1  
Cartesian coordinates (Angs):  
C 0.000000 0.000000 0.141679  
O 0.000000 0.000000 1.313238  
F 0.000000 1.060818 -0.630888  
F 0.000000 -1.060818 -0.630888  
Rotational constants (GHz): 11.8192200 11.7736000 5.8981800  
Vibrational harmonic frequencies (cm-1):  
588.0028 629.2054 794.4039  
1013.0912 1333.8831 2055.8938  
Zero-point correction (Hartree): 0.014613

H2O

-----  
E(RM062X/CC-pVDZ) (Hartree): -76.38877424  
Point group : C2V  
Electronic state : 1-A1  
Cartesian coordinates (Angs):  
O 0.000000 0.000000 0.120151  
H 0.000000 0.755011 -0.480605  
H 0.000000 -0.755011 -0.480605  
Rotational constants (GHz): 782.2606700 439.8404600 281.5396300  
Vibrational harmonic frequencies (cm-1):  
1648.4950 3842.0977 3943.2940  
Zero-point correction (Hartree): 0.021492

CF3OH

-----  
E(RM062X/CC-pVDZ) (Hartree): -413.36940150  
Electronic state : 1-A  
Cartesian coordinates (Angs):  
C -0.004235 0.023024 -0.000064  
F 0.247193 -0.741912 -1.071102  
F 0.251023 -0.732751 1.076428  
F 0.833123 1.045907 -0.005726  
O -1.261230 0.497464 0.000289

H -1.866800 -0.259049 0.001667  
 Rotational constants (GHz): 5.7304900 5.6603700 5.6243900  
 Vibrational harmonic frequencies (cm-1):  
 254.9522 447.1666 460.1038  
 608.7028 629.8676 643.5574  
 934.3151 1155.9023 1266.7147  
 1370.1402 1458.1360 3838.1555  
 Zero-point correction (Hartree): 0.029770

CF3OCFCF2

-----  
 E(RM062X/CC-pVDZ) (Hartree): -788.35463805  
 Electronic state : 1-A  
 Cartesian coordinates (Angs):  
 C 1.672616 -0.287932 -0.068459  
 C 0.694091 0.564996 -0.335089  
 O -0.488561 0.168681 -0.874721  
 F 0.823924 1.869870 -0.148821  
 C -1.471733 -0.111240 0.043085  
 F -1.683853 0.918544 0.854497  
 F -1.141887 -1.159607 0.790339  
 F -2.570402 -0.380072 -0.628547  
 F 1.566372 -1.581829 -0.246295  
 F 2.843472 0.072607 0.396666  
 Rotational constants (GHz): 2.3475600 0.9395300 0.7772000  
 Vibrational harmonic frequencies (cm-1):  
 42.7445 67.2912 118.5448  
 192.6827 210.7831 341.5436  
 369.1534 452.4712 469.3770  
 546.3894 554.7824 607.0276  
 641.9512 652.4408 726.3140  
 856.0562 946.8563 1225.8433  
 1270.7324 1303.7518 1382.7947  
 1388.7653 1429.0729 1961.5734  
 Zero-point correction (Hartree): 0.040458

CF3OCFCF2OH.b

-----  
 E(UM062X/CC-pVDZ) (Hartree): -864.15280338  
 Electronic state : 2-A  
 Cartesian coordinates (Angs):  
 C 1.502030 -0.252021 -0.021838  
 C 0.534407 0.774244 -0.585957  
 O -0.714846 0.384491 -0.972365  
 F 0.556457 1.932774 0.051753  
 C -1.579501 -0.094752 -0.028635  
 F -1.607587 0.664494 1.058163  
 F -1.223854 -1.332989 0.362502  
 F -2.775371 -0.157696 -0.565521  
 F 1.413833 -1.359640 -0.788736  
 O 1.312176 -0.555740 1.292582  
 F 2.735018 0.253939 -0.128970  
 H 0.593268 -1.202761 1.354128  
 Rotational constants (GHz): 1.9696800 0.8478200 0.7506500  
 Vibrational harmonic frequencies (cm-1):  
 34.0092 57.7252 130.6047  
 166.3854 196.9071 218.3432  
 300.4147 330.8038 364.7875  
 430.5164 485.7505 511.8767  
 558.3645 586.8435 632.2428  
 637.7359 687.4308 764.8264  
 824.3453 921.6583 1140.6732  
 1141.4601 1226.2863 1263.6132  
 1279.1272 1347.5469 1386.6135  
 1410.4939 1440.3405 3841.3603  
 Zero-point correction (Hartree): 0.055403

CF3OCFCF2OH

-----  
 E(UM062X/CC-pVDZ) (Hartree): -864.15271486  
 Electronic state : 2-A

Cartesian coordinates (Angs):

|   |           |           |           |
|---|-----------|-----------|-----------|
| C | 1.500508  | -0.282034 | -0.043294 |
| C | 0.538221  | 0.729093  | -0.626795 |
| O | -0.721638 | 0.391282  | -0.972266 |
| F | 0.640371  | 1.923976  | -0.036838 |
| C | -1.584319 | -0.096976 | -0.008336 |
| F | -1.441210 | 0.554633  | 1.138165  |
| F | -1.375259 | -1.386552 | 0.206145  |
| F | -2.809080 | 0.070498  | -0.463405 |
| F | 1.528887  | -1.365365 | -0.820154 |
| O | 2.758734  | 0.204735  | 0.060467  |
| F | 1.040946  | -0.677631 | 1.180618  |
| H | 2.714872  | 1.055345  | 0.524159  |

Rotational constants (GHz): 1.9624500 0.8637900 0.7603500

Vibrational harmonic frequencies (cm-1):

|           |           |           |
|-----------|-----------|-----------|
| 31.1296   | 71.9159   | 109.6047  |
| 151.8585  | 196.0286  | 216.7416  |
| 280.2610  | 341.3362  | 359.5651  |
| 428.2155  | 473.3544  | 521.8439  |
| 554.3154  | 590.7160  | 632.1368  |
| 636.9499  | 686.3507  | 766.1424  |
| 819.7463  | 922.6191  | 1096.5140 |
| 1135.6155 | 1218.4450 | 1288.1493 |
| 1313.9371 | 1341.1435 | 1369.4645 |
| 1399.4842 | 1475.4214 | 3828.9544 |

Zero-point correction (Hartree): 0.055264

CF3OCFCFOH

-----

E(RM062X/CC-pVDZ) (Hartree): -764.35221643

Electronic state : 1-A

Cartesian coordinates (Angs):

|   |           |           |           |
|---|-----------|-----------|-----------|
| C | 1.682358  | -0.319785 | -0.070948 |
| C | 0.689821  | 0.521001  | -0.348632 |
| O | -0.508046 | 0.163192  | -0.880570 |
| F | 0.864540  | 1.841022  | -0.167272 |
| C | -1.486363 | -0.096591 | 0.044836  |
| F | -1.671217 | 0.936875  | 0.860975  |
| F | -1.177893 | -1.153370 | 0.789486  |
| F | -2.599475 | -0.338905 | -0.616260 |
| F | 1.551738  | -1.617250 | -0.237490 |
| O | 2.889670  | 0.009563  | 0.393260  |
| H | 2.922873  | 0.974845  | 0.481991  |

Rotational constants (GHz): 2.3447800 0.9509600 0.7844900

Vibrational harmonic frequencies (cm-1):

|           |           |           |
|-----------|-----------|-----------|
| 45.7715   | 68.7031   | 110.0883  |
| 191.9706  | 209.4577  | 340.8296  |
| 351.6364  | 370.1612  | 437.5304  |
| 468.8086  | 548.0042  | 559.8556  |
| 624.6288  | 642.2215  | 654.0201  |
| 717.0477  | 855.6679  | 946.9498  |
| 1152.5390 | 1271.5632 | 1296.5798 |
| 1308.2966 | 1369.0874 | 1379.4009 |
| 1481.6466 | 1934.6331 | 3825.0868 |

Zero-point correction (Hartree): 0.052767

CF3OCFCFO

-----

E(UM062X/CC-pVDZ) (Hartree): -763.73876235

Electronic state : 2-A

Cartesian coordinates (Angs):

|   |           |           |           |
|---|-----------|-----------|-----------|
| C | 1.826660  | -0.306897 | -0.011068 |
| C | 0.733990  | 0.588808  | -0.292829 |
| O | -0.429580 | 0.206207  | -0.843029 |
| F | 0.902570  | 1.874515  | -0.141163 |
| C | -1.445694 | -0.103548 | 0.043163  |
| F | -1.752313 | 0.948446  | 0.789716  |
| F | -1.082193 | -1.091046 | 0.848178  |
| F | -2.485288 | -0.465587 | -0.670284 |
| F | 1.475239  | -1.576069 | -0.251364 |
| O | 2.903096  | 0.008480  | 0.391610  |

Rotational constants (GHz): 2.3575000 0.9821800 0.8048500  
 Vibrational harmonic frequencies (cm-1):  
 34.6011 49.7698 74.2047  
 142.3748 209.5242 327.5129  
 354.0007 382.2282 466.1603  
 534.6876 564.6519 638.6468  
 665.7959 669.2335 702.1340  
 838.0330 946.0423 1165.2849  
 1239.1636 1317.6725 1390.8386  
 1429.3370 1529.3187 1864.1480  
 Zero-point correction (Hartree): 0.039949

CF3OCFOCF2OH

E(UM062X/CC-pVDZ) (Hartree): -939.35055168

Electronic state : 2-A

Cartesian coordinates (Angs):

|   |           |           |           |
|---|-----------|-----------|-----------|
| C | 1.351517  | -0.530633 | -0.022931 |
| C | 0.567815  | 0.867204  | 0.000152  |
| O | -0.721303 | 0.810099  | -0.541184 |
| F | 1.228040  | 1.676829  | -0.848812 |
| C | -1.661809 | -0.048858 | -0.043660 |
| F | -1.657106 | -0.107965 | 1.282132  |
| F | -1.488873 | -1.280349 | -0.514410 |
| F | -2.835868 | 0.395782  | -0.453244 |
| F | 1.188648  | -1.045071 | -1.233854 |
| O | 2.667337  | -0.371922 | 0.199876  |
| F | 0.773628  | -1.347700 | 0.877370  |
| H | 2.787159  | 0.100392  | 1.038901  |
| O | 0.652902  | 1.255524  | 1.263445  |

Rotational constants (GHz): 1.5663200 0.7911300 0.7189700

Vibrational harmonic frequencies (cm-1):  
 62.6395 79.8852 116.8089  
 169.5713 200.9001 225.4360  
 274.5833 315.1010 339.9183  
 357.4456 381.3601 433.9029  
 471.4822 517.9227 536.1759  
 585.0397 624.8445 660.6677  
 687.7100 734.4103 768.9161  
 874.5457 977.2055 1095.3918  
 1173.5591 1228.1175 1289.0952  
 1300.1688 1312.2486 1335.9739  
 1382.4719 1439.5061 3818.5755

Zero-point correction (Hartree): 0.058712

CF3OCFOCFO

E(UM062X/CC-pVDZ) (Hartree): -838.92025750

Electronic state : 2-A

Cartesian coordinates (Angs):

|   |           |           |           |
|---|-----------|-----------|-----------|
| C | 1.542186  | -0.562552 | 0.161134  |
| C | 0.724132  | 0.727279  | -0.152791 |
| O | -0.503760 | 0.456203  | -0.771156 |
| F | 1.409853  | 1.413435  | -1.087698 |
| C | -1.472993 | -0.127597 | -0.002901 |
| F | -2.052376 | 0.741183  | 0.811521  |
| F | -0.964218 | -1.115729 | 0.742746  |
| F | -2.377289 | -0.623474 | -0.819367 |
| F | 1.403667  | -1.413816 | -0.844425 |
| O | 2.215047  | -0.749146 | 1.106257  |
| O | 0.596629  | 1.388297  | 1.007694  |

Rotational constants (GHz): 1.7516400 0.9239000 0.8419900

Vibrational harmonic frequencies (cm-1):  
 39.2746 58.6082 91.7071  
 165.0382 215.6815 232.5666  
 334.0522 356.4422 376.2570  
 433.2546 483.9399 520.5625  
 622.1618 646.5482 677.6836  
 714.0592 786.4851 821.2214  
 942.2781 1071.3351 1186.8303  
 1218.5876 1289.7746 1304.0120



1318.3689 1389.1805 2000.5364  
Zero-point correction (Hartree): 0.043961

CF3OCFOHCF2

-----  
E(UM062X/CC-pVDZ) (Hartree): -864.15090431

Electronic state : 2-A

Cartesian coordinates (Angs):

|   |           |           |           |
|---|-----------|-----------|-----------|
| C | -1.468539 | 0.672877  | 0.102535  |
| C | -0.895448 | -0.724242 | -0.011581 |
| O | 0.398115  | -0.803145 | -0.588518 |
| F | -0.811504 | -1.233597 | 1.243742  |
| C | 1.399895  | -0.005914 | -0.118907 |
| F | 1.512324  | -0.046088 | 1.202785  |
| F | 1.208681  | 1.265951  | -0.472754 |
| F | 2.524617  | -0.431574 | -0.664141 |
| F | -1.504108 | 1.340980  | -1.031352 |
| F | -0.976741 | 1.395671  | 1.089820  |
| O | -1.716115 | -1.448424 | -0.799620 |
| H | -1.250861 | -2.265873 | -1.040083 |

Rotational constants (GHz): 1.5597400 1.0000600 0.8848400

Vibrational harmonic frequencies (cm-1):

|           |           |           |
|-----------|-----------|-----------|
| 52.1003   | 99.6120   | 130.5446  |
| 157.2650  | 204.2146  | 218.4213  |
| 305.6484  | 349.5107  | 365.3784  |
| 406.8178  | 449.6697  | 507.2350  |
| 550.7400  | 582.1924  | 613.4673  |
| 659.0262  | 683.4816  | 752.4771  |
| 833.6755  | 937.8475  | 1080.2086 |
| 1145.7284 | 1262.9880 | 1299.3164 |
| 1314.5774 | 1347.5755 | 1364.6519 |
| 1378.1792 | 1508.8686 | 3804.1409 |

Zero-point correction (Hartree): 0.055509

CF3OCFOCF2OH.a

-----  
E(UM062X/CC-pVDZ) (Hartree): -1014.49166116

Electronic state : 2-A

Cartesian coordinates (Angs):

|   |           |           |           |
|---|-----------|-----------|-----------|
| C | -1.086260 | 0.885992  | -0.003508 |
| C | -0.498625 | -0.552614 | 0.091905  |
| O | 0.715372  | -0.742217 | -0.518433 |
| F | -0.494074 | -0.944337 | 1.368922  |
| C | 1.870826  | -0.123141 | -0.086517 |
| F | 1.842099  | 0.151874  | 1.207544  |
| F | 2.084549  | 0.992476  | -0.763168 |
| F | 2.860159  | -0.960825 | -0.332803 |
| F | -1.310368 | 1.118156  | -1.314485 |
| O | -2.176623 | 1.085897  | 0.753225  |
| F | -0.143939 | 1.744367  | 0.406341  |
| O | -1.299367 | -1.485605 | -0.652266 |
| O | -2.548723 | -1.423096 | -0.303101 |
| H | -2.786748 | 0.343351  | 0.602162  |

Rotational constants (GHz): 1.3350000 0.6682700 0.5838000

Vibrational harmonic frequencies (cm-1):

|           |           |           |
|-----------|-----------|-----------|
| 31.4599   | 78.3334   | 90.5647   |
| 120.5422  | 169.1334  | 217.1604  |
| 229.1803  | 287.9877  | 328.7751  |
| 347.7605  | 367.6370  | 399.3712  |
| 442.9937  | 446.5259  | 477.1721  |
| 543.9579  | 568.8980  | 606.2962  |
| 624.1929  | 683.5254  | 708.9546  |
| 763.6965  | 815.8179  | 951.7727  |
| 1076.3876 | 1171.8793 | 1193.4084 |
| 1236.1015 | 1287.8150 | 1310.5447 |
| 1314.9903 | 1336.0462 | 1364.9986 |
| 1399.9767 | 1455.9734 | 3771.0607 |

Zero-point correction (Hartree): 0.064292

CF3OCFOCF2OH.b

E(UM062X/CC-pVDZ) (Hartree): -1014.49039045  
 Electronic state : 2-A  
 Cartesian coordinates (Angs):

|   |           |           |           |
|---|-----------|-----------|-----------|
| C | -0.992171 | 0.939396  | -0.024246 |
| C | -0.541969 | -0.545378 | 0.031186  |
| O | 0.688170  | -0.832431 | -0.501728 |
| F | -0.649540 | -0.958162 | 1.304024  |
| C | 1.826264  | -0.183361 | -0.073707 |
| F | 1.870331  | -0.081596 | 1.246036  |
| F | 1.919481  | 1.027385  | -0.600656 |
| F | 2.842126  | -0.910726 | -0.491756 |
| F | -0.749942 | 1.416015  | -1.245293 |
| O | -2.297579 | 1.115552  | 0.251363  |
| F | -0.207615 | 1.613173  | 0.850007  |
| H | -2.561557 | 0.510998  | 0.963705  |
| O | -1.388872 | -1.352621 | -0.787318 |
| O | -2.553566 | -1.521717 | -0.227862 |

Rotational constants (GHz): 1.3084300 0.6908800 0.5936000  
 Vibrational harmonic frequencies (cm-1):

|           |           |           |
|-----------|-----------|-----------|
| 64.6053   | 82.1346   | 105.4384  |
| 149.8109  | 155.0087  | 210.1429  |
| 216.7138  | 227.3207  | 276.5627  |
| 331.5791  | 354.0653  | 368.8438  |
| 402.2195  | 438.7321  | 476.2832  |
| 546.8789  | 572.0087  | 598.0006  |
| 631.7293  | 697.3217  | 715.2341  |
| 765.3362  | 815.8198  | 952.8177  |
| 1079.3707 | 1156.6953 | 1194.9612 |
| 1232.1090 | 1270.4203 | 1294.6427 |
| 1312.8804 | 1329.2816 | 1366.3555 |
| 1393.0315 | 1453.2218 | 3812.5026 |

Zero-point correction (Hartree): 0.063903

CF3OCFOHCF2O

-----

E(UM062X/CC-pVDZ) (Hartree): -1014.45407928  
 Electronic state : 2-A  
 Cartesian coordinates (Angs):

|   |           |           |           |
|---|-----------|-----------|-----------|
| C | 1.594121  | -0.730088 | -0.040296 |
| C | 0.368272  | 0.247894  | 0.069703  |
| O | -0.686573 | -0.405477 | -0.522742 |
| F | 0.144359  | 0.502683  | 1.366196  |
| C | -1.960605 | -0.102773 | -0.091876 |
| F | -2.221414 | -0.675785 | 1.072848  |
| F | -2.787211 | -0.578536 | -1.000766 |
| F | -2.140996 | 1.204284  | 0.031345  |
| F | 1.703775  | -1.102319 | -1.331634 |
| O | 2.688275  | -0.119405 | 0.408674  |
| F | 1.303895  | -1.834177 | 0.669361  |
| O | 0.563465  | 1.415477  | -0.640991 |
| O | 1.641331  | 2.085787  | -0.016372 |
| H | 2.315618  | 2.053399  | -0.719885 |

Rotational constants (GHz): 1.3195100 0.6285400 0.5485000  
 Vibrational harmonic frequencies (cm-1):

|           |           |           |
|-----------|-----------|-----------|
| 42.8522   | 49.2126   | 74.7488   |
| 123.3936  | 161.0846  | 209.7715  |
| 223.9721  | 260.5212  | 306.2218  |
| 340.3914  | 354.9138  | 365.3602  |
| 385.5199  | 428.5558  | 500.7852  |
| 548.7252  | 562.8610  | 595.1564  |
| 632.2285  | 654.9522  | 715.8977  |
| 744.1175  | 851.1434  | 934.3263  |
| 1047.9762 | 1062.1653 | 1155.4691 |
| 1226.5319 | 1237.0957 | 1250.5931 |
| 1317.1305 | 1323.3292 | 1336.5852 |
| 1388.2496 | 1446.7462 | 3747.1922 |

Zero-point correction (Hartree): 0.062891

CF3COHCF2

-----

E(RM062X/CC-pVDZ) (Hartree): -764.35149549

Electronic state : 1-A  
 Cartesian coordinates (Angs):

|   |           |           |           |
|---|-----------|-----------|-----------|
| C | 1.664350  | -0.289644 | -0.061357 |
| C | 0.700557  | 0.578653  | -0.346123 |
| O | -0.483577 | 0.102792  | -0.892531 |
| C | -1.449568 | -0.135391 | 0.029921  |
| F | -1.638320 | 0.941352  | 0.818407  |
| F | -1.142101 | -1.151746 | 0.829778  |
| F | -2.572987 | -0.402550 | -0.600661 |
| F | 2.833911  | 0.053771  | 0.422852  |
| F | 1.567040  | -1.582533 | -0.264814 |
| O | 0.845215  | 1.912211  | -0.231304 |
| H | 0.186973  | 2.233624  | 0.405987  |

Rotational constants (GHz): 2.3594500 0.9482300 0.7873400  
 Vibrational harmonic frequencies (cm-1):

|           |           |           |
|-----------|-----------|-----------|
| 56.3819   | 73.8533   | 130.0879  |
| 203.8369  | 214.2157  | 325.5031  |
| 362.1713  | 370.6758  | 453.0713  |
| 480.9830  | 543.2033  | 561.7109  |
| 620.8788  | 645.0231  | 654.6573  |
| 719.0532  | 850.7701  | 940.0746  |
| 1179.7084 | 1239.4897 | 1294.3232 |
| 1324.6848 | 1368.6271 | 1387.3415 |
| 1419.5866 | 1945.3410 | 3784.9508 |

Zero-point correction (Hartree): 0.052740

CH3OCHCH2

-----  
 E(RM062X/CC-pVDZ) (Hartree): -193.03591470  
 Electronic state : 1-A  
 Cartesian coordinates (Angs):

|   |           |           |           |
|---|-----------|-----------|-----------|
| C | 1.434143  | 0.568648  | 0.000003  |
| C | 0.732832  | -0.568565 | -0.000005 |
| O | -0.609584 | -0.716963 | 0.000013  |
| H | 1.217255  | -1.547108 | -0.000025 |
| C | -1.357855 | 0.478097  | -0.000007 |
| H | -1.138226 | 1.081005  | -0.897020 |
| H | -1.138307 | 1.080989  | 0.897037  |
| H | -2.413629 | 0.186560  | -0.000054 |
| H | 0.974108  | 1.555502  | 0.000027  |
| H | 2.520750  | 0.509679  | -0.000013 |

Rotational constants (GHz): 18.2889000 6.4601700 4.9248000  
 Vibrational harmonic frequencies (cm-1):

|           |           |           |
|-----------|-----------|-----------|
| 256.0947  | 280.8650  | 341.4340  |
| 596.2423  | 728.0034  | 847.8294  |
| 942.1595  | 1009.1841 | 1057.3613 |
| 1171.9543 | 1217.2540 | 1278.5429 |
| 1351.5511 | 1406.9691 | 1465.9034 |
| 1467.7104 | 1487.6039 | 1736.6951 |
| 3036.3770 | 3106.2853 | 3180.9864 |
| 3203.9581 | 3223.2741 | 3303.1601 |

Zero-point correction (Hartree): 0.085881

CH3OCHCH2OH

-----  
 E(UM062X/CC-pVDZ) (Hartree): -268.78646623  
 Electronic state : 2-A  
 Cartesian coordinates (Angs):

|   |           |           |           |
|---|-----------|-----------|-----------|
| C | -0.950174 | -0.394724 | 0.318576  |
| C | -0.039447 | 0.740023  | -0.035034 |
| O | 1.310180  | 0.668494  | 0.075055  |
| H | -0.401361 | 1.754792  | 0.146213  |
| C | 1.903455  | -0.595498 | -0.139550 |
| H | 1.587391  | -1.023122 | -1.105581 |
| H | 1.657706  | -1.303593 | 0.668569  |
| H | 2.987015  | -0.432705 | -0.153471 |
| H | -1.055311 | -0.512357 | 1.414269  |
| O | -2.252888 | -0.134008 | -0.159411 |
| H | -0.557859 | -1.355553 | -0.065077 |
| H | -2.158923 | 0.097838  | -1.094021 |

Rotational constants (GHz): 14.4439400 2.6519400 2.3869200

Vibrational harmonic frequencies (cm-1):

|           |           |           |
|-----------|-----------|-----------|
| 78.0753   | 160.9798  | 249.6241  |
| 261.3442  | 372.0982  | 385.3998  |
| 548.6671  | 643.6833  | 941.1431  |
| 1012.2734 | 1116.1845 | 1131.0510 |
| 1160.5391 | 1190.4572 | 1203.5872 |
| 1318.6425 | 1322.3098 | 1388.0796 |
| 1446.9464 | 1473.4654 | 1477.6533 |
| 1487.2814 | 1497.1383 | 3003.6716 |
| 3031.3064 | 3041.4855 | 3108.8984 |
| 3172.9491 | 3202.9570 | 3823.7039 |

Zero-point correction (Hartree): 0.100813

CH3OCHOHCH2

E(UM062X/CC-pVDZ) (Hartree): -268.79105185

Electronic state : 2-A

Cartesian coordinates (Angs):

|   |           |           |           |
|---|-----------|-----------|-----------|
| C | -0.746925 | 1.395192  | -0.111862 |
| C | -0.464829 | -0.008616 | 0.308975  |
| O | 0.659940  | -0.540309 | -0.362533 |
| H | -0.266310 | -0.050024 | 1.402914  |
| C | 1.874678  | 0.006341  | 0.088825  |
| H | 2.019375  | -0.167479 | 1.171916  |
| H | 1.929814  | 1.093358  | -0.099047 |
| H | 2.680780  | -0.491940 | -0.462591 |
| H | -0.816033 | 1.591653  | -1.182673 |
| H | -1.093970 | 2.142602  | 0.600009  |
| O | -1.555343 | -0.803955 | -0.040507 |
| H | -1.267978 | -1.721560 | 0.078161  |

Rotational constants (GHz): 8.5975000 4.0586800 3.0513600

Vibrational harmonic frequencies (cm-1):

|           |           |           |
|-----------|-----------|-----------|
| 64.4565   | 121.6963  | 208.7737  |
| 285.1803  | 320.1088  | 380.3213  |
| 472.6788  | 529.8539  | 597.2581  |
| 871.4363  | 1045.9035 | 1103.3912 |
| 1161.8142 | 1174.7358 | 1190.1219 |
| 1236.6008 | 1282.2993 | 1368.5716 |
| 1399.2550 | 1455.6505 | 1465.1359 |
| 1486.7515 | 1495.5145 | 2953.5102 |
| 3011.8079 | 3074.2263 | 3166.0398 |
| 3177.4365 | 3300.4756 | 3816.8991 |

Zero-point correction (Hartree): 0.098458

complex.CF3OCFCF2.OH.a

E(UM062X/CC-pVDZ) (Hartree): -864.06225948

Electronic state : 2-A

Cartesian coordinates (Angs):

|   |           |           |           |
|---|-----------|-----------|-----------|
| C | 1.508895  | -0.741170 | -0.098708 |
| C | 0.676475  | 0.217200  | 0.277209  |
| O | -0.468236 | 0.497055  | -0.411411 |
| F | 0.912975  | 1.009484  | 1.307922  |
| C | -1.581220 | -0.187689 | 0.018678  |
| F | -1.791635 | -0.000474 | 1.315632  |
| F | -1.452800 | -1.490744 | -0.194850 |
| F | -2.607631 | 0.271514  | -0.666953 |
| F | 1.281534  | -1.528877 | -1.121609 |
| F | 2.638978  | -1.001352 | 0.509560  |
| H | 0.174459  | 2.620018  | -0.924354 |
| O | 1.139217  | 2.792192  | -0.914344 |

Rotational constants (GHz): 1.2933600 0.8178700 0.6594800

Vibrational harmonic frequencies (cm-1):

|          |           |           |
|----------|-----------|-----------|
| 25.1118  | 40.2045   | 55.5376   |
| 71.9722  | 89.0994   | 117.3545  |
| 145.5216 | 195.4270  | 215.2323  |
| 335.5326 | 343.8949  | 370.7291  |
| 460.3984 | 469.9556  | 547.1884  |
| 555.4644 | 609.5410  | 644.3089  |
| 652.8220 | 727.7043  | 855.5684  |
| 949.6319 | 1225.4701 | 1270.2020 |

1310.7071                    1375.6679                    1383.1856  
 1430.0651                    1969.1764                    3709.0402  
 Zero-point correction (Hartree): 0.050465

complex.CF3OCFCF2.OH.b

-----  
 E(UM062X/CC-pVDZ) (Hartree): -864.06520395  
 Electronic state : 2-A  
 Cartesian coordinates (Angs):  
   C     1.580719     -0.369306     -0.371650  
   C     0.583567     0.455330     -0.676246  
   O    -0.639913    -0.002858     -1.056408  
   F     0.733549     1.765442     -0.707633  
   C    -1.568594    -0.110326     -0.055349  
   F    -1.727867     1.027812     0.600363  
   F    -1.205146    -1.046558     0.831888  
   F    -2.705125    -0.471362     -0.609008  
   F     1.437861    -1.672310     -0.336831  
   F     2.793910     0.025486     -0.100555  
   H     0.326080    -0.279005     2.198820  
   O     0.909303     0.473886     1.970987  
 Rotational constants (GHz):   1.7056800     0.7952200     0.7542700  
 Vibrational harmonic frequencies (cm-1):  
   30.1339                    61.3884                    79.9992  
  100.0813                    114.8918                    148.6306  
  185.3447                    199.5076                    212.5133  
  341.2620                    367.1227                    416.6684  
  450.4326                    470.8440                    544.3322  
  556.1535                    589.8232                    641.8362  
  650.7202                    722.1286                    853.5707  
  945.4680                    1226.7566                    1258.8383  
 1297.4994                    1380.9804                    1394.1516  
 1436.4112                    1929.2556                    3726.7267  
 Zero-point correction (Hartree): 0.050879

CF2OCFCF2oxide

-----  
 E(UM062X/CC-pVDZ) (Hartree): -763.66994286  
 Electronic state : 2-A  
 Cartesian coordinates (Angs):  
   C     1.618728     -0.267317     0.055010  
   C     0.342268     0.363359     -0.214158  
   O    -0.739438    -0.369247     -0.607891  
   F     0.264156     1.633928     -0.594234  
   C    -1.811541    -0.308347     0.241818  
   F    -2.214239     0.930430     0.486758  
   F    -2.783941    -1.043499     -0.241506  
   F     1.803889    -1.571341     -0.034415  
   O     0.814851     0.166919     1.093429  
   F     2.763465     0.371867     -0.103306  
 Rotational constants (GHz):   2.7697900     0.8727200     0.7390500  
 Vibrational harmonic frequencies (cm-1):  
   31.0534                    61.5035                    127.8471  
  177.1115                    243.9467                    296.4394  
  381.8529                    502.1014                    515.8797  
  550.5544                    557.1616                    596.5021  
  685.2540                    755.5934                    825.7184  
  887.6839                    1079.7284                    1186.0441  
 1218.9193                    1279.1284                    1329.7550  
 1361.9423                    1368.8636                    1684.8001  
 Zero-point correction (Hartree): 0.040336

CF3OCFCF2oxide

-----  
 E(UM062X/CC-pVDZ) (Hartree): -763.68149156  
 Electronic state : 2-A  
 Cartesian coordinates (Angs):  
   C    -1.914947     0.012978     -0.071451  
   C    -0.551255    -0.383678     -0.291268  
   O     0.483133     0.470455     -0.511606  
   C     1.703853     0.031279     -0.056713

|                                          |           |           |           |  |
|------------------------------------------|-----------|-----------|-----------|--|
| F                                        | 2.059428  | -1.097543 | -0.658385 |  |
| F                                        | 2.582200  | 0.971735  | -0.332870 |  |
| F                                        | -2.287228 | 1.274355  | 0.057100  |  |
| O                                        | -1.137969 | -0.484820 | 0.969882  |  |
| F                                        | -2.945167 | -0.722478 | -0.444706 |  |
| F                                        | 1.681075  | -0.187020 | 1.251126  |  |
| Rotational constants (GHz):              | 3.2482700 | 0.7258200 | 0.6986100 |  |
| Vibrational harmonic frequencies (cm-1): |           |           |           |  |
| 20.4560                                  | 65.3396   |           | 113.2779  |  |
| 201.2603                                 | 265.6559  |           | 358.6345  |  |
| 442.2116                                 | 502.3326  |           | 528.4847  |  |
| 549.4260                                 | 622.1372  |           | 632.4332  |  |
| 675.5862                                 | 734.2437  |           | 809.1391  |  |
| 925.7098                                 | 966.1950  |           | 1177.8388 |  |
| 1224.4180                                | 1291.7392 |           | 1311.4290 |  |
| 1343.5575                                | 1381.0109 |           | 1651.9387 |  |
| Zero-point correction (Hartree):         | 0.040539  |           |           |  |

CF3OCOCF2OH

-----

E(RM062X/CC-pVDZ) (Hartree): -839.61717822

Electronic state : 1-A

Cartesian coordinates (Angs):

|                                          |           |           |           |  |
|------------------------------------------|-----------|-----------|-----------|--|
| C                                        | 1.854914  | -0.157632 | -0.002875 |  |
| C                                        | 0.436579  | 0.445252  | -0.004516 |  |
| O                                        | -0.500059 | -0.526803 | -0.009251 |  |
| C                                        | -1.829387 | -0.130295 | -0.001162 |  |
| F                                        | -2.116372 | 0.589773  | -1.071609 |  |
| F                                        | -2.108393 | 0.571514  | 1.083410  |  |
| F                                        | -2.548265 | -1.232811 | -0.007889 |  |
| F                                        | 1.975985  | -0.988816 | -1.054245 |  |
| O                                        | 2.787588  | 0.804982  | -0.045269 |  |
| F                                        | 1.988208  | -0.918359 | 1.102918  |  |
| H                                        | 2.332952  | 1.664197  | -0.009814 |  |
| O                                        | 0.234212  | 1.621839  | 0.003002  |  |
| Rotational constants (GHz):              | 2.2259100 | 0.6748200 | 0.6323600 |  |
| Vibrational harmonic frequencies (cm-1): |           |           |           |  |
| 7.6795                                   | 58.0155   |           | 104.5933  |  |
| 132.4288                                 | 215.4772  |           | 218.0114  |  |
| 329.9825                                 | 346.8529  |           | 391.8969  |  |
| 443.7729                                 | 447.1603  |           | 533.7401  |  |
| 567.4955                                 | 592.4113  |           | 628.7016  |  |
| 678.3863                                 | 766.7280  |           | 789.3800  |  |
| 916.1523                                 | 933.4619  |           | 1128.1279 |  |
| 1219.0141                                | 1230.7431 |           | 1298.9084 |  |
| 1339.9056                                | 1375.3228 |           | 1380.2128 |  |
| 1488.2195                                | 1936.3847 |           | 3764.9931 |  |
| Zero-point correction (Hartree):         | 0.057556  |           |           |  |

CFOHCF2

-----

E(RM062X/CC-pVDZ) (Hartree): -451.38638020

Electronic state : 1-A

Cartesian coordinates (Angs):

|                                          |           |           |           |  |
|------------------------------------------|-----------|-----------|-----------|--|
| C                                        | 0.659810  | 0.013499  | -0.011909 |  |
| C                                        | -0.665037 | -0.027700 | 0.009103  |  |
| O                                        | 1.440381  | -1.071026 | -0.106666 |  |
| F                                        | 1.290884  | 1.191847  | 0.007668  |  |
| F                                        | -1.432303 | 1.042984  | -0.004494 |  |
| F                                        | -1.356974 | -1.148147 | 0.016993  |  |
| H                                        | 1.993857  | -1.126735 | 0.688658  |  |
| Rotational constants (GHz):              | 5.4523500 | 3.2790500 | 2.0583800 |  |
| Vibrational harmonic frequencies (cm-1): |           |           |           |  |
| 195.4942                                 | 208.9100  |           | 265.7097  |  |
| 401.0679                                 | 440.7599  |           | 561.4975  |  |
| 568.8550                                 | 589.5642  |           | 822.2124  |  |
| 1181.7732                                | 1306.1006 |           | 1387.9893 |  |
| 1408.3588                                | 1971.4149 |           | 3785.6745 |  |
| Zero-point correction (Hartree):         | 0.034390  |           |           |  |

CFOCFOH

```

-----
E(UM062X/CC-pVDZ) (Hartree): -426.78665429
Electronic state : 2-A
Cartesian coordinates (Angs):
  C   -0.756121   0.121130   0.000383
  C    0.654128  -0.033315   0.000012
  F   -1.430369  -1.033527   0.000092
  O   -1.296256   1.203679  -0.000371
  F    1.257553  -1.192410  -0.000159
  O    1.457771   1.010350  -0.000048
  H    0.875186   1.794315   0.001579
Rotational constants (GHz):   5.6139100   3.5443500   2.1726500
Vibrational harmonic frequencies (cm-1):
  162.1495                226.0065                335.7396
  409.8361                557.5674                558.8438
  609.5359                648.9475                845.0635
  1164.8958              1280.4961              1534.9799
  1639.6829              1808.3475              3723.5835
Zero-point correction (Hartree): 0.035325

```

CFOCF2O

```

-----
E(UM062X/CC-pVDZ) (Hartree): -525.96466685
Point group : CS
Electronic state : 2-A'
Cartesian coordinates (Angs):
  C    0.321360  -0.881000   0.000000
  C   -0.045881   0.626598   0.000000
  F   -0.803099  -1.582466   0.000000
  O    1.399106  -1.350222   0.000000
  F   -0.803099   0.893056   1.079353
  F   -0.803099   0.893056  -1.079353
  O    1.104743   1.311921   0.000000
Rotational constants (GHz):   3.8873600   2.5794400   2.1288200
Vibrational harmonic frequencies (cm-1):
  33.3852 ( A'')   216.2060 ( A')   223.9653 ( A'')
  374.4052 ( A')   411.2589 ( A')   473.0212 ( A'')
  591.2733 ( A')   682.6296 ( A')   768.5877 ( A'')
  824.3158 ( A')   1069.0838 ( A')  1218.1761 ( A'')
  1248.9357 ( A')  1336.0031 ( A')  2001.8490 ( A')
Zero-point correction (Hartree): 0.026138

```

OCCF2OH

```

-----
E(UM062X/CC-pVDZ) (Hartree): -426.76586253
Electronic state : 2-A
Cartesian coordinates (Angs):
  C   -1.039773  -0.603678  -0.369696
  C    0.373060   0.006150  -0.018933
  O   -2.033401  -0.058667  -0.061981
  F    1.244688  -0.286037  -0.979092
  F    0.764517  -0.632185   1.105392
  O    0.336131   1.343393   0.140207
  H   -0.504399   1.571367   0.569264
Rotational constants (GHz):   5.7016900   3.0407200   2.9893800
Vibrational harmonic frequencies (cm-1):
  90.8463                251.9533                340.2675
  381.8375                421.9729                539.0082
  563.0071                666.7879                799.7310
  1097.2475              1195.4603              1313.7883
  1430.7454              2015.3724              3803.2641
Zero-point correction (Hartree): 0.033970

```

TS.CF3OCFCF2OH.CF3+HOFCF2CFO

```

-----
E(UM062X/CC-pVDZ) (Hartree): -864.10683749
Electronic state : 2-A
Cartesian coordinates (Angs):
  C    1.629197  -0.310862  -0.009215
  C    0.621532   0.725049  -0.487774
  O   -0.402939   0.472511  -1.099931

```

|                                          |           |           |           |           |
|------------------------------------------|-----------|-----------|-----------|-----------|
| F                                        | 0.824853  | 1.937740  | 0.054701  |           |
| C                                        | -1.857238 | -0.113453 | 0.023013  |           |
| F                                        | -1.488521 | 0.259614  | 1.228762  |           |
| F                                        | -1.969980 | -1.412534 | -0.067506 |           |
| F                                        | -2.941701 | 0.502001  | -0.368663 |           |
| F                                        | 1.942317  | -1.128810 | -1.017292 |           |
| O                                        | 2.770159  | 0.207774  | 0.489128  |           |
| F                                        | 0.982776  | -1.075009 | 0.918540  |           |
| H                                        | 2.553609  | 1.006297  | 0.993404  |           |
| Rotational constants (GHz):              | 1.8827000 |           | 0.7356500 | 0.6587200 |
| Vibrational harmonic frequencies (cm-1): |           |           |           |           |
| i551.1443                                | 26.3667   |           |           | 41.6632   |
| 59.9623                                  | 103.3701  |           |           | 146.1078  |
| 197.2344                                 | 251.8859  |           |           | 265.8266  |
| 303.6714                                 | 400.6340  |           |           | 444.0886  |
| 510.6656                                 | 527.5065  |           |           | 539.5820  |
| 599.7575                                 | 639.9165  |           |           | 679.3325  |
| 720.7646                                 | 820.8845  |           |           | 1042.6922 |
| 1091.5365                                | 1157.8104 |           |           | 1264.3768 |
| 1365.8613                                | 1379.6566 |           |           | 1391.7052 |
| 1441.1681                                | 1595.9698 |           |           | 3839.7409 |
| Zero-point correction (Hartree):         | 0.052056  |           |           |           |

TS.CF3OCFCF2OH.CF3OCF2CFOH

E(UM062X/CC-pVDZ) (Hartree): -864.08993652

Electronic state : 2-A

Cartesian coordinates (Angs):

|   |           |           |           |
|---|-----------|-----------|-----------|
| C | 1.657246  | -0.363637 | -0.273586 |
| C | 0.597298  | 0.463397  | -0.575642 |
| O | -0.592681 | 0.000751  | -0.959725 |
| F | 0.759773  | 1.760606  | -0.599711 |
| C | -1.600205 | -0.113743 | 0.001294  |
| F | -1.714495 | 0.990319  | 0.709831  |
| F | -1.378665 | -1.140504 | 0.793635  |
| F | -2.712302 | -0.320975 | -0.678369 |
| F | 1.520551  | -1.645928 | -0.440707 |
| O | 2.845106  | 0.053490  | 0.083761  |
| F | 0.790292  | 0.248350  | 1.463314  |
| H | 2.668182  | 0.623154  | 0.863376  |

Rotational constants (GHz): 1.9178600 0.8277900 0.7541200

|                                          |           |  |           |
|------------------------------------------|-----------|--|-----------|
| Vibrational harmonic frequencies (cm-1): |           |  |           |
| i287.0679                                | 21.1511   |  | 91.4147   |
| 137.2784                                 | 163.5648  |  | 206.0898  |
| 218.7353                                 | 297.8701  |  | 339.7178  |
| 354.0187                                 | 375.9234  |  | 467.0722  |
| 481.9111                                 | 540.1653  |  | 549.9658  |
| 575.5125                                 | 636.6884  |  | 654.3041  |
| 720.0576                                 | 848.6219  |  | 950.6233  |
| 1194.6503                                | 1206.7557 |  | 1291.6838 |
| 1354.3349                                | 1365.9412 |  | 1446.3046 |
| 1520.8888                                | 1773.4148 |  | 3648.3167 |
| Zero-point correction (Hartree):         | 0.053384  |  |           |

TS.CF3OCFCF2OH.CF3OCFCF2+OH

E(UM062X/CC-pVDZ) (Hartree): -864.06253826

Electronic state : 2-A

Cartesian coordinates (Angs):

|   |           |           |           |
|---|-----------|-----------|-----------|
| C | -1.407800 | -0.377410 | -0.336857 |
| C | -0.483199 | 0.544016  | -0.029448 |
| O | 0.588520  | 0.275364  | 0.748232  |
| F | -0.645469 | 1.813453  | -0.369235 |
| C | 1.721636  | -0.086215 | 0.056132  |
| F | 2.065339  | 0.848167  | -0.823455 |
| F | 1.532852  | -1.221897 | -0.606623 |
| F | 2.684566  | -0.243565 | 0.936059  |
| F | -1.268300 | -1.639480 | -0.058293 |
| O | -2.307203 | 0.158229  | 1.586709  |
| F | -2.436039 | -0.112607 | -1.097741 |
| H | -2.630899 | 1.052258  | 1.355102  |



Rotational constants (GHz): 1.8089000 0.7346200 0.6841400  
 Vibrational harmonic frequencies (cm-1):  
 i292.7795 37.9959 68.1747  
 79.6251 103.9954 140.7065  
 190.2716 199.6665 243.2688  
 342.3516 368.6890 411.5625  
 465.5586 507.0406 555.5844  
 558.1256 641.5671 649.4315  
 664.9366 719.6689 849.7104  
 946.4766 1228.5566 1262.8040  
 1304.6369 1384.9430 1398.6794  
 1452.5751 1846.1985 3726.2009  
 Zero-point correction (Hartree): 0.050915

TS.CF3OCFCF2OH.CF2O+CF2O+CF+HF  
 -----

E(UM062X/CC-pVDZ) (Hartree): -864.04373107

Electronic state : 2-A

Cartesian coordinates (Angs):

|   |           |           |           |
|---|-----------|-----------|-----------|
| C | -1.659760 | -0.423680 | -0.038935 |
| C | -1.064546 | 1.256439  | 0.572911  |
| O | 0.894282  | 0.465073  | 1.059965  |
| F | -0.726443 | 1.990782  | -0.391549 |
| C | 1.770485  | 0.316736  | 0.267872  |
| F | 1.727884  | 0.734706  | -0.962318 |
| F | 1.220066  | -1.782023 | -0.583384 |
| F | 2.940241  | -0.152963 | 0.545489  |
| F | -1.510972 | -1.136003 | 1.076006  |
| O | -1.007207 | -0.665198 | -1.043958 |
| F | -2.952916 | -0.076374 | -0.140271 |
| H | 0.345584  | -1.499101 | -0.834896 |

Rotational constants (GHz): 1.6736400 0.7458900 0.6414700

Vibrational harmonic frequencies (cm-1):  
 i121.2333 40.5500 50.4237  
 72.0061 101.7826 141.2068  
 156.0526 169.1996 203.6548  
 213.8516 232.6536 270.0908  
 369.4656 385.1384 560.4618  
 593.5700 617.0532 653.8522  
 716.5701 767.7607 795.0455  
 853.9754 959.6299 1040.6265  
 1252.6612 1387.9249 1431.3202  
 1708.7091 1942.5242 3455.6154

Zero-point correction (Hartree): 0.048168

TS.CF3OCFCF2OH.CF3OCFCFO+HF  
 -----

E(UM062X/CC-pVDZ) (Hartree): -864.09142693

Electronic state : 2-A

Cartesian coordinates (Angs):

|   |           |           |           |
|---|-----------|-----------|-----------|
| C | 1.535440  | -0.172146 | -0.350612 |
| C | 0.485968  | 0.796778  | -0.533397 |
| O | -0.751730 | 0.481182  | -0.925903 |
| F | 0.648998  | 1.987865  | -0.026365 |
| C | -1.581072 | -0.117645 | 0.021875  |
| F | -1.566644 | 0.571164  | 1.149995  |
| F | -1.193118 | -1.354356 | 0.265881  |
| F | -2.791130 | -0.123063 | -0.489800 |
| F | 1.316057  | -1.295749 | -0.988405 |
| O | 2.721498  | 0.152674  | -0.013472 |
| F | 1.273892  | -0.662900 | 1.384220  |
| H | 2.407334  | -0.219429 | 1.028059  |

Rotational constants (GHz): 1.8406000 0.8516200 0.7695600

Vibrational harmonic frequencies (cm-1):  
 i1442.1940 30.9921 62.5143  
 79.9027 104.8496 159.6607  
 206.6040 294.6185 346.2982  
 373.7423 449.7006 463.7451  
 538.5035 561.8552 620.8879  
 631.0149 664.3307 705.6063  
 790.7884 846.4672 926.3906

|           |           |           |
|-----------|-----------|-----------|
| 946.2653  | 1201.8459 | 1246.3266 |
| 1338.2892 | 1383.1716 | 1439.8977 |
| 1521.3787 | 1671.2167 | 2151.7167 |

Zero-point correction (Hartree): 0.049570

TS.CF3OCFCF2OH.CF3OCFHCF2O

-----

E(UM062X/CC-pVDZ) (Hartree): -864.08853855

Electronic state : 2-A

Cartesian coordinates (Angs):

|   |           |           |           |
|---|-----------|-----------|-----------|
| C | -1.807480 | -0.241396 | 0.005136  |
| C | -0.458082 | 0.427938  | 0.035456  |
| O | 0.541447  | -0.251413 | -0.595244 |
| F | -2.814840 | 0.562866  | -0.350202 |
| F | -0.440624 | 1.743397  | -0.165095 |
| F | -1.891239 | -1.354076 | -0.728696 |
| O | -1.766299 | -0.491366 | 1.353188  |
| H | -0.597301 | 0.114028  | 1.312167  |
| C | 1.795591  | -0.139531 | -0.038174 |
| F | 1.796741  | -0.596210 | 1.210345  |
| F | 2.207111  | 1.120209  | -0.014545 |
| F | 2.611288  | -0.859949 | -0.772942 |

Rotational constants (GHz): 2.1052600 0.6925300 0.6379300

Vibrational harmonic frequencies (cm-1):

|            |           |           |
|------------|-----------|-----------|
| i1994.7735 | 25.8416   | 64.3534   |
| 91.8140    | 160.6811  | 209.5000  |
| 270.9146   | 332.1101  | 365.0041  |
| 429.9808   | 482.7567  | 531.4378  |
| 551.8734   | 591.5122  | 639.0407  |
| 658.7853   | 732.2696  | 754.9359  |
| 904.0860   | 937.8266  | 1085.5425 |
| 1182.7294  | 1216.6856 | 1247.4372 |
| 1288.3268  | 1311.1927 | 1337.6063 |
| 1390.5746  | 1488.5048 | 2032.7261 |

Zero-point correction (Hartree): 0.050840

TS.CF3OCFCFO.CFOCFO+CF3

-----

E(UM062X/CC-pVDZ) (Hartree): -763.68593667

Electronic state : 2-A

Cartesian coordinates (Angs):

|   |           |           |           |
|---|-----------|-----------|-----------|
| C | 1.790748  | -0.439115 | 0.009161  |
| C | 0.914048  | 0.687222  | -0.434052 |
| O | -0.123754 | 0.556627  | -1.056845 |
| F | 1.324932  | 1.863740  | 0.008022  |
| C | -1.639347 | -0.055597 | 0.084879  |
| F | -2.533931 | 0.880655  | 0.253308  |
| F | -1.003871 | -0.333381 | 1.202075  |
| F | -2.131731 | -1.121514 | -0.479623 |
| F | 1.235963  | -1.601515 | -0.333068 |
| O | 2.821885  | -0.349993 | 0.579799  |

Rotational constants (GHz): 2.1866000 0.9042700 0.7559300

Vibrational harmonic frequencies (cm-1):

|           |           |           |
|-----------|-----------|-----------|
| i492.5493 | 39.9501   | 51.2726   |
| 67.9916   | 109.6130  | 144.9495  |
| 226.1791  | 269.6194  | 431.4772  |
| 459.6702  | 527.1826  | 530.8548  |
| 576.1467  | 664.6601  | 671.3077  |
| 782.1377  | 844.8291  | 1031.8328 |
| 1184.2731 | 1341.5574 | 1377.1712 |
| 1402.2187 | 1612.9540 | 1963.7628 |

Zero-point correction (Hartree): 0.037161

TS.CF3OCFCF2OH.CF3+HOCF2CFO.b

-----

E(UM062X/CC-pVDZ) (Hartree): -864.10850576

Electronic state : 2-A

Cartesian coordinates (Angs):

|   |           |           |           |
|---|-----------|-----------|-----------|
| C | 1.578043  | -0.338756 | 0.008103  |
| C | 0.613740  | 0.745809  | -0.442607 |
| O | -0.419402 | 0.511734  | -1.071978 |

|                                          |           |           |           |  |
|------------------------------------------|-----------|-----------|-----------|--|
| F                                        | 0.870948  | 1.949370  | 0.040126  |  |
| C                                        | -1.849126 | -0.088973 | 0.026421  |  |
| F                                        | -1.317030 | -0.086511 | 1.226706  |  |
| F                                        | -2.140226 | -1.303625 | -0.372583 |  |
| F                                        | -2.876785 | 0.712454  | -0.058010 |  |
| F                                        | 2.772789  | -0.136441 | -0.600710 |  |
| O                                        | 1.090308  | -1.571962 | -0.246713 |  |
| F                                        | 1.803807  | -0.234887 | 1.325928  |  |
| H                                        | 0.555285  | -1.529897 | -1.055084 |  |
| Rotational constants (GHz):              | 1.9127600 | 0.7309200 | 0.6589500 |  |
| Vibrational harmonic frequencies (cm-1): |           |           |           |  |
| i557.8708                                | 35.1067   |           | 40.6900   |  |
| 51.7458                                  | 102.0955  |           | 163.8409  |  |
| 207.4582                                 | 242.0278  |           | 280.0163  |  |
| 325.2953                                 | 421.7072  |           | 444.3114  |  |
| 511.3547                                 | 528.5437  |           | 542.2412  |  |
| 603.2652                                 | 638.0907  |           | 681.6789  |  |
| 716.4092                                 | 824.9535  |           | 1040.8790 |  |
| 1113.7136                                | 1180.9823 |           | 1282.8568 |  |
| 1366.0766                                | 1372.0545 |           | 1387.8648 |  |
| 1454.7492                                | 1577.8987 |           | 3816.4843 |  |
| Zero-point correction (Hartree):         | 0.052294  |           |           |  |

TS.CF3OCFOCF2OH.CF2OH+CF3OCFO

E(UM062X/CC-pVDZ) (Hartree): -939.34915337

Electronic state : 2-A

Cartesian coordinates (Angs):

|                                          |           |           |           |  |
|------------------------------------------|-----------|-----------|-----------|--|
| C                                        | 1.455216  | -0.572011 | -0.027808 |  |
| C                                        | 0.470431  | 0.989916  | 0.053244  |  |
| O                                        | -0.737880 | 0.735443  | -0.589470 |  |
| F                                        | 1.157256  | 1.719420  | -0.845303 |  |
| C                                        | -1.693806 | -0.077919 | -0.041016 |  |
| F                                        | -1.715955 | -0.054338 | 1.280807  |  |
| F                                        | -1.510482 | -1.336427 | -0.434490 |  |
| F                                        | -2.861251 | 0.335334  | -0.503399 |  |
| F                                        | 1.378912  | -0.978518 | -1.271632 |  |
| O                                        | 2.699120  | -0.276123 | 0.314632  |  |
| F                                        | 0.833343  | -1.423385 | 0.777961  |  |
| H                                        | 2.664637  | 0.191275  | 1.168544  |  |
| O                                        | 0.589749  | 1.216932  | 1.261016  |  |
| Rotational constants (GHz):              | 1.5427200 | 0.7666300 | 0.6939300 |  |
| Vibrational harmonic frequencies (cm-1): |           |           |           |  |
| i191.2982                                | 19.9856   |           | 30.4818   |  |
| 109.4788                                 | 161.5048  |           | 204.7069  |  |
| 208.0590                                 | 273.6430  |           | 296.9906  |  |
| 365.3265                                 | 408.5255  |           | 428.8971  |  |
| 452.0698                                 | 457.4413  |           | 545.7483  |  |
| 564.2543                                 | 568.3001  |           | 626.3329  |  |
| 675.4160                                 | 735.3634  |           | 740.1965  |  |
| 884.8728                                 | 1000.5867 |           | 1032.1709 |  |
| 1192.9665                                | 1218.8064 |           | 1290.5568 |  |
| 1310.9766                                | 1351.4774 |           | 1385.8185 |  |
| 1459.2265                                | 1593.8331 |           | 3769.0087 |  |
| Zero-point correction (Hartree):         | 0.057781  |           |           |  |

TS.CF3OCFOCF2OH.CF3O+HOCF2CFO

E(UM062X/CC-pVDZ) (Hartree): -939.31671301

Electronic state : 2-A

Cartesian coordinates (Angs):

|   |           |           |           |  |
|---|-----------|-----------|-----------|--|
| C | 1.435234  | -0.519615 | -0.006451 |  |
| C | 0.880623  | 0.916880  | 0.112298  |  |
| O | -0.818989 | 0.800588  | -0.557271 |  |
| F | 1.367435  | 1.680865  | -0.851310 |  |
| C | -1.756448 | -0.071515 | -0.050436 |  |
| F | -1.739164 | -0.099099 | 1.269135  |  |
| F | -1.566590 | -1.302670 | -0.511871 |  |
| F | -2.941106 | 0.347191  | -0.474978 |  |
| F | 1.288057  | -0.961528 | -1.249797 |  |
| O | 2.757825  | -0.550947 | 0.296411  |  |

|                                          |           |           |           |           |
|------------------------------------------|-----------|-----------|-----------|-----------|
| F                                        | 0.725405  | -1.299684 | 0.830517  |           |
| H                                        | 2.853600  | -0.420001 | 1.252652  |           |
| O                                        | 0.509115  | 1.397838  | 1.174562  |           |
| Rotational constants (GHz):              | 1.5575700 | 0.7348900 | 0.6657300 |           |
| Vibrational harmonic frequencies (cm-1): |           |           |           |           |
| i632.0476                                |           | 35.1574   |           | 60.6623   |
| 108.2176                                 |           | 131.7866  |           | 166.3456  |
| 222.0512                                 |           | 245.5953  |           | 264.6131  |
| 305.4907                                 |           | 379.7768  |           | 387.9266  |
| 429.7950                                 |           | 450.5346  |           | 496.5667  |
| 565.1058                                 |           | 590.3327  |           | 612.7000  |
| 652.2858                                 |           | 673.2861  |           | 695.6424  |
| 826.6604                                 |           | 930.9053  |           | 1139.2119 |
| 1150.1990                                |           | 1226.3768 |           | 1284.6814 |
| 1316.3826                                |           | 1330.8024 |           | 1367.2719 |
| 1429.7164                                |           | 1608.4539 |           | 3825.6804 |
| Zero-point correction (Hartree):         | 0.056750  |           |           |           |

TS.CF3OCFOCF2OH.F+HOCHF2COOCH3

E(UM062X/CC-pVDZ) (Hartree): -939.30719846

Electronic state : 2-A

Cartesian coordinates (Angs):

|                                          |           |           |           |           |
|------------------------------------------|-----------|-----------|-----------|-----------|
| C                                        | 1.800752  | -0.345391 | -0.024447 |           |
| C                                        | 0.391832  | 0.211881  | 0.262258  |           |
| O                                        | -0.558815 | -0.515209 | -0.330466 |           |
| F                                        | 0.526627  | 1.747870  | -0.758300 |           |
| C                                        | -1.886715 | -0.205650 | -0.041757 |           |
| F                                        | -2.153365 | 1.053392  | -0.325325 |           |
| F                                        | -2.152154 | -0.435587 | 1.231722  |           |
| F                                        | -2.618458 | -0.997458 | -0.794115 |           |
| F                                        | 1.947490  | -0.586379 | -1.328790 |           |
| O                                        | 2.763174  | 0.479078  | 0.410946  |           |
| F                                        | 1.850469  | -1.545838 | 0.604193  |           |
| H                                        | 2.366151  | 1.119138  | 1.025012  |           |
| O                                        | 0.194786  | 1.010107  | 1.186294  |           |
| Rotational constants (GHz):              | 1.6596700 | 0.6410100 | 0.5965800 |           |
| Vibrational harmonic frequencies (cm-1): |           |           |           |           |
| i635.6810                                |           | 49.9108   |           | 63.5040   |
| 89.2412                                  |           | 131.4915  |           | 147.6127  |
| 201.9788                                 |           | 230.3687  |           | 236.8554  |
| 320.1073                                 |           | 350.0361  |           | 380.2717  |
| 434.6564                                 |           | 455.7166  |           | 519.3497  |
| 567.1603                                 |           | 594.8585  |           | 612.6590  |
| 652.4509                                 |           | 677.7699  |           | 767.8573  |
| 907.6717                                 |           | 932.1051  |           | 1123.2011 |
| 1202.6793                                |           | 1222.4352 |           | 1308.9543 |
| 1343.2433                                |           | 1379.4643 |           | 1393.5740 |
| 1479.7686                                |           | 1629.2206 |           | 3784.3044 |
| Zero-point correction (Hartree):         | 0.057388  |           |           |           |

TS.CF3OCFOCFO.CF3OCFO+CFO

E(UM062X/CC-pVDZ) (Hartree): -838.91722482

Electronic state : 2-A

Cartesian coordinates (Angs):

|                                          |           |           |           |          |
|------------------------------------------|-----------|-----------|-----------|----------|
| C                                        | 1.857736  | -0.559173 | -0.111112 |          |
| C                                        | 0.577174  | 0.811581  | 0.163048  |          |
| O                                        | -0.429416 | 0.412739  | -0.706816 |          |
| F                                        | 1.216574  | 1.807261  | -0.449126 |          |
| C                                        | -1.559349 | -0.126968 | -0.134331 |          |
| F                                        | -2.144419 | 0.736602  | 0.681322  |          |
| F                                        | -1.294487 | -1.236037 | 0.540724  |          |
| F                                        | -2.379148 | -0.412639 | -1.127523 |          |
| F                                        | 1.334990  | -1.702173 | 0.234743  |          |
| O                                        | 2.938802  | -0.325927 | -0.477604 |          |
| O                                        | 0.508743  | 0.726968  | 1.381059  |          |
| Rotational constants (GHz):              | 1.8674600 | 0.8498000 | 0.7293900 |          |
| Vibrational harmonic frequencies (cm-1): |           |           |           |          |
| i378.6346                                |           | 34.3271   |           | 66.4783  |
| 98.7611                                  |           | 153.6847  |           | 192.4636 |

|           |           |           |
|-----------|-----------|-----------|
| 199.2025  | 289.8169  | 378.8329  |
| 390.5581  | 419.9109  | 481.6961  |
| 556.2383  | 592.0313  | 630.2703  |
| 675.3103  | 696.2131  | 747.8336  |
| 901.5256  | 1011.6466 | 1153.2560 |
| 1233.0026 | 1290.9599 | 1323.4873 |
| 1365.6613 | 1631.5241 | 2036.5169 |

Zero-point correction (Hartree): 0.042263

TS.CF3OCFOCFO.CF3OCOCFO+F

E(UM062X/CC-pVDZ) (Hartree): -838.87849309

Electronic state : 2-A

Cartesian coordinates (Angs):

|   |           |           |           |
|---|-----------|-----------|-----------|
| C | 2.048073  | 0.197450  | -0.230674 |
| C | 0.494052  | -0.497121 | 0.004443  |
| O | -0.398463 | 0.516318  | 0.066026  |
| F | 1.464165  | -0.149493 | 1.386632  |
| C | -1.734904 | 0.146342  | -0.052206 |
| F | -2.065960 | -0.732044 | 0.875983  |
| F | -1.979592 | -0.368719 | -1.243820 |
| F | -2.432554 | 1.248802  | 0.105527  |
| F | 1.931076  | 1.500903  | -0.223702 |
| O | 2.941697  | -0.448144 | -0.630835 |
| O | 0.319573  | -1.640057 | -0.239560 |

Rotational constants (GHz): 2.2024900 0.7208000 0.6727100

Vibrational harmonic frequencies (cm-1):

|           |           |           |
|-----------|-----------|-----------|
| i445.3568 | 36.2862   | 72.4269   |
| 133.7687  | 160.7912  | 205.2082  |
| 260.6222  | 324.3828  | 378.1907  |
| 398.8609  | 435.3141  | 439.6874  |
| 556.4235  | 591.1264  | 623.6830  |
| 662.6422  | 678.8256  | 713.2768  |
| 846.0060  | 915.1009  | 1124.8898 |
| 1176.4417 | 1237.2151 | 1337.3931 |
| 1384.0305 | 1854.7569 | 1952.4264 |

Zero-point correction (Hartree): 0.042146

TS.CF3OCFOCFO.FCOCFO+CF3O

E(UM062X/CC-pVDZ) (Hartree): -838.88975913

Electronic state : 2-A

Cartesian coordinates (Angs):

|   |           |           |           |
|---|-----------|-----------|-----------|
| C | -1.624730 | -0.622657 | -0.153475 |
| C | -0.999610 | 0.778646  | -0.228256 |
| O | 0.503547  | 0.469536  | 0.749036  |
| F | -1.581848 | 1.616811  | 0.609912  |
| C | 1.571019  | -0.130350 | 0.123615  |
| F | 2.258920  | 0.711472  | -0.624845 |
| F | 1.186232  | -1.152732 | -0.630164 |
| F | 2.342162  | -0.574479 | 1.106891  |
| F | -2.114718 | -0.848576 | 1.055588  |
| O | -1.668080 | -1.386040 | -1.045651 |
| O | -0.397568 | 1.175716  | -1.216853 |

Rotational constants (GHz): 1.7388500 0.8388600 0.7683600

Vibrational harmonic frequencies (cm-1):

|           |           |           |
|-----------|-----------|-----------|
| i669.6136 | 27.4940   | 53.0315   |
| 91.5743   | 135.8066  | 155.0051  |
| 230.9810  | 259.8989  | 333.0859  |
| 414.6621  | 432.7594  | 483.3394  |
| 526.4895  | 614.4268  | 621.1924  |
| 666.6544  | 679.1187  | 756.3493  |
| 830.8795  | 934.3982  | 1177.1304 |
| 1236.4302 | 1312.9719 | 1329.5020 |
| 1352.8692 | 1595.5293 | 2011.9341 |

Zero-point correction (Hartree): 0.041607

TS.CF3OCFOHCF2.CF3OCFCF2+OH

E(UM062X/CC-pVDZ) (Hartree): -864.06137899

Electronic state : 2-A

Cartesian coordinates (Angs):

|   |           |           |           |
|---|-----------|-----------|-----------|
| C | 1.411821  | 0.563177  | -0.210412 |
| C | 0.578794  | -0.487691 | -0.125044 |
| O | -0.539000 | -0.446809 | 0.646302  |
| F | 0.702469  | -1.532234 | -0.911126 |
| C | -1.653741 | 0.072938  | 0.027938  |
| F | -1.931570 | -0.578163 | -1.093366 |
| F | -1.474679 | 1.355183  | -0.275469 |
| F | -2.655376 | -0.041820 | 0.871319  |
| F | 1.259158  | 1.641698  | 0.511616  |
| F | 2.481420  | 0.572933  | -0.950557 |
| O | 1.921931  | -1.172309 | 1.396690  |
| H | 1.482511  | -0.695972 | 2.129420  |

Rotational constants (GHz): 1.7121400 0.7791000 0.7166000

Vibrational harmonic frequencies (cm-1):

|           |           |           |
|-----------|-----------|-----------|
| i318.5091 | 40.9742   | 70.4573   |
| 96.9759   | 111.7947  | 127.9691  |
| 196.7594  | 209.0177  | 264.8463  |
| 339.5696  | 359.0356  | 406.5740  |
| 466.5302  | 515.3255  | 546.4871  |
| 558.0087  | 639.1605  | 651.5491  |
| 702.0443  | 712.5300  | 846.8572  |
| 947.1249  | 1228.1840 | 1265.8331 |
| 1306.5812 | 1383.4519 | 1405.9371 |
| 1452.6538 | 1844.6972 | 3731.8852 |

Zero-point correction (Hartree): 0.051097

TS.CF3OCFOHCF2.CF3OCFOCF2H

E(UM062X/CC-pVDZ) (Hartree): -864.08151994

Electronic state : 2-A

Cartesian coordinates (Angs):

|   |           |           |           |
|---|-----------|-----------|-----------|
| C | 0.581099  | -0.312717 | 0.167086  |
| C | 1.967578  | 0.269312  | 0.087384  |
| F | 2.858234  | -0.406409 | -0.613906 |
| O | -0.401920 | 0.611610  | -0.155025 |
| F | 2.081406  | 1.570169  | -0.094982 |
| F | 0.408299  | -1.441083 | -0.548552 |
| O | 0.728547  | -0.573196 | 1.514667  |
| H | 1.934541  | -0.075213 | 1.366350  |
| C | -1.700934 | 0.182881  | -0.090145 |
| F | -2.465115 | 1.251190  | 0.036530  |
| F | -1.900612 | -0.628154 | 0.945057  |
| F | -2.052657 | -0.464486 | -1.194085 |

Rotational constants (GHz): 2.0970700 0.7205500 0.6744300

Vibrational harmonic frequencies (cm-1):

|            |           |           |
|------------|-----------|-----------|
| i2010.2961 | 41.7103   | 72.1776   |
| 103.8572   | 123.1684  | 209.1708  |
| 265.7493   | 344.6287  | 362.9963  |
| 399.5847   | 453.4509  | 524.1736  |
| 538.5823   | 612.8344  | 642.3207  |
| 668.3162   | 715.1296  | 779.5455  |
| 869.5129   | 952.8196  | 1074.5215 |
| 1169.6429  | 1193.1069 | 1227.3491 |
| 1308.2535  | 1317.6407 | 1355.2006 |
| 1368.4396  | 1504.2534 | 2038.0498 |

Zero-point correction (Hartree): 0.050658

TS.CF3OCFOHCF2.CF3OCOCF2+HF

E(UM062X/CC-pVDZ) (Hartree): -864.08520329

Electronic state : 2-A

Cartesian coordinates (Angs):

|   |           |           |           |
|---|-----------|-----------|-----------|
| C | -1.325520 | 0.756909  | -0.183472 |
| C | -0.766540 | -0.536063 | -0.455495 |
| O | 0.547711  | -0.664279 | -0.735124 |
| F | -0.946929 | -1.392721 | 1.177602  |
| C | 1.533193  | 0.012793  | -0.039883 |
| F | 1.190624  | 0.237386  | 1.214762  |
| F | 1.799318  | 1.172158  | -0.629300 |
| F | 2.611437  | -0.739721 | -0.080419 |

|                                          |           |           |           |  |
|------------------------------------------|-----------|-----------|-----------|--|
| F                                        | -2.596050 | 0.864898  | 0.039534  |  |
| F                                        | -0.634075 | 1.794226  | 0.185189  |  |
| O                                        | -1.540689 | -1.454542 | -0.917887 |  |
| H                                        | -1.521903 | -1.877315 | 0.130875  |  |
| Rotational constants (GHz):              | 1.7298600 | 0.9026100 | 0.7469200 |  |
| Vibrational harmonic frequencies (cm-1): |           |           |           |  |
| i1347.2893                               | 43.4268   |           | 97.9282   |  |
| 106.7756                                 | 123.7823  |           | 174.2174  |  |
| 212.5826                                 | 255.7267  |           | 358.7171  |  |
| 372.3259                                 | 389.3421  |           | 462.1516  |  |
| 506.5857                                 | 546.5458  |           | 598.4069  |  |
| 627.2798                                 | 655.1259  |           | 728.1086  |  |
| 777.6425                                 | 830.7319  |           | 924.6459  |  |
| 994.5221                                 | 1219.0501 |           | 1270.9563 |  |
| 1326.4221                                | 1378.8582 |           | 1471.8888 |  |
| 1509.5827                                | 1663.1788 |           | 2194.3313 |  |
| Zero-point correction (Hartree):         | 0.049712  |           |           |  |

TS.CF3OCFOHCF2.CF3OCOHC3

E(UM062X/CC-pVDZ) (Hartree): -864.08396191

Electronic state : 2-A

Cartesian coordinates (Angs):

|                                          |           |           |           |  |
|------------------------------------------|-----------|-----------|-----------|--|
| C                                        | 1.253229  | -0.572603 | -0.253868 |  |
| C                                        | 0.678312  | 0.678579  | -0.340708 |  |
| O                                        | -0.628427 | 0.983919  | -0.273744 |  |
| C                                        | -1.593110 | 0.032835  | -0.024984 |  |
| F                                        | -1.419917 | -0.540690 | 1.150336  |  |
| F                                        | -1.591166 | -0.902234 | -0.970049 |  |
| F                                        | -2.746941 | 0.663542  | -0.044571 |  |
| F                                        | 2.514386  | -0.730557 | -0.512213 |  |
| F                                        | 0.645663  | -1.672134 | 0.059158  |  |
| O                                        | 1.434538  | 1.724489  | -0.628642 |  |
| H                                        | 2.011243  | 1.803889  | 0.161878  |  |
| F                                        | 1.432341  | 0.481626  | 1.514513  |  |
| Rotational constants (GHz):              | 1.8441400 | 0.8474900 | 0.7570000 |  |
| Vibrational harmonic frequencies (cm-1): |           |           |           |  |
| i344.4161                                | 30.2493   |           | 96.4331   |  |
| 145.0258                                 | 158.9223  |           | 193.7578  |  |
| 232.3611                                 | 277.2401  |           | 342.6229  |  |
| 366.4745                                 | 381.7430  |           | 443.5963  |  |
| 466.6893                                 | 511.6903  |           | 535.8137  |  |
| 571.1586                                 | 628.5574  |           | 649.8572  |  |
| 734.8371                                 | 815.8558  |           | 977.8304  |  |
| 1216.1477                                | 1262.7300 |           | 1284.4531 |  |
| 1321.3611                                | 1380.6372 |           | 1462.3312 |  |
| 1486.7780                                | 1774.3073 |           | 3635.8647 |  |
| Zero-point correction (Hartree):         | 0.053276  |           |           |  |

TS.CFOCF2OH.CFOCFO+HF

E(UM062X/CC-pVDZ) (Hartree): -526.58036479

Electronic state : 1-A

Cartesian coordinates (Angs):

|                                          |           |           |           |  |
|------------------------------------------|-----------|-----------|-----------|--|
| C                                        | -0.523447 | 0.213250  | -0.254719 |  |
| C                                        | 0.985572  | 0.077121  | -0.043245 |  |
| O                                        | 1.727968  | 0.960271  | 0.190139  |  |
| F                                        | 1.344882  | -1.188158 | -0.181538 |  |
| F                                        | -0.923618 | 1.433420  | -0.031404 |  |
| O                                        | -1.185264 | -0.548049 | -1.009632 |  |
| F                                        | -1.050642 | -0.687037 | 1.131659  |  |
| H                                        | -1.449975 | -1.064027 | 0.075273  |  |
| Rotational constants (GHz):              | 3.6475200 | 2.5055800 | 1.9820300 |  |
| Vibrational harmonic frequencies (cm-1): |           |           |           |  |
| i1646.8304                               | 63.8366   |           | 168.4411  |  |
| 233.4023                                 | 324.1323  |           | 406.9839  |  |
| 489.3905                                 | 637.5765  |           | 682.1138  |  |
| 736.0815                                 | 829.3055  |           | 879.6634  |  |
| 930.6562                                 | 1223.7996 |           | 1409.8650 |  |
| 1683.6616                                | 2009.6530 |           | 2039.5564 |  |
| Zero-point correction (Hartree):         | 0.033599  |           |           |  |

TS.CF3+OCFCF2OH.CF4+OCFCFOH

E(UM062X/CC-pVDZ) (Hartree): -864.07045061

Electronic state : 2-A

Cartesian coordinates (Angs):

|   |           |           |           |
|---|-----------|-----------|-----------|
| C | -1.311918 | 0.684016  | -0.012533 |
| C | -1.982693 | -0.629400 | -0.170485 |
| O | -2.288132 | -1.182564 | -1.168018 |
| F | -2.140129 | -1.182936 | 1.057406  |
| C | 2.102103  | -0.141888 | -0.004664 |
| F | 2.660478  | 0.932611  | -0.500538 |
| F | 2.341103  | -1.195030 | -0.744156 |
| F | 2.461768  | -0.338367 | 1.240927  |
| F | -1.337908 | 1.447193  | -1.074279 |
| O | -1.466914 | 1.379967  | 1.105213  |
| F | 0.320776  | 0.135758  | -0.002818 |
| H | -1.559363 | 0.751358  | 1.839652  |

Rotational constants (GHz): 1.6336500 0.5942900 0.5647000

Vibrational harmonic frequencies (cm-1):

|            |           |           |
|------------|-----------|-----------|
| i1080.1972 | 12.3695   | 47.0225   |
| 51.5692    | 97.6063   | 132.2606  |
| 190.1267   | 196.8999  | 240.8138  |
| 299.8201   | 333.9486  | 394.7373  |
| 426.8272   | 512.1196  | 534.0525  |
| 535.5335   | 552.1276  | 642.4711  |
| 710.6455   | 760.0589  | 837.3126  |
| 1058.0286  | 1110.2091 | 1242.3046 |
| 1374.1614  | 1380.7016 | 1450.1824 |
| 1502.3223  | 1959.9874 | 3814.8382 |

Zero-point correction (Hartree): 0.051033

TS.CF3+OCFCF2OH.HCF3+OCFCF2O

E(UM062X/CC-pVDZ) (Hartree): -864.10213827

Electronic state : 2-A

Cartesian coordinates (Angs):

|   |           |           |           |
|---|-----------|-----------|-----------|
| C | 1.241590  | 0.903239  | -0.111360 |
| C | 1.192367  | -0.637745 | -0.154407 |
| F | 2.324883  | 1.308292  | 0.534127  |
| O | 0.442537  | 1.636877  | -0.574596 |
| F | 1.045777  | -1.075743 | 1.111802  |
| F | 2.363231  | -1.100336 | -0.619552 |
| O | 0.233122  | -1.121589 | -0.978498 |
| H | -0.944751 | -0.457467 | -0.640395 |
| C | -1.871160 | -0.039443 | -0.023829 |
| F | -2.430866 | 0.957557  | -0.677499 |
| F | -1.435730 | 0.375173  | 1.157683  |
| F | -2.738106 | -1.022847 | 0.138186  |

Rotational constants (GHz): 1.7577500 0.7239700 0.6307300

Vibrational harmonic frequencies (cm-1):

|           |           |           |
|-----------|-----------|-----------|
| i810.9099 | 38.3740   | 49.5589   |
| 65.5190   | 91.3804   | 121.1996  |
| 164.9846  | 232.3184  | 241.8893  |
| 352.5742  | 423.5195  | 438.6320  |
| 518.5474  | 529.2110  | 610.4914  |
| 656.2512  | 710.2377  | 779.9419  |
| 808.7344  | 871.7337  | 1135.9724 |
| 1149.6999 | 1214.6565 | 1247.8860 |
| 1288.8744 | 1322.9989 | 1347.2995 |
| 1378.2232 | 1510.3796 | 1998.9832 |

Zero-point correction (Hartree): 0.048525

TS.CFOCF2OH+CF3.CF4+OCCF2OH

E(UM062X/CC-pVDZ) (Hartree): -864.05944840

Electronic state : 2-A

Cartesian coordinates (Angs):

|   |          |           |           |
|---|----------|-----------|-----------|
| C | 1.054156 | 0.974810  | -0.414156 |
| C | 1.726685 | -0.352737 | -0.011329 |
| O | 1.332864 | 2.041215  | 0.004675  |



|                                          |           |           |           |  |  |
|------------------------------------------|-----------|-----------|-----------|--|--|
| F                                        | 1.769688  | -1.196173 | -1.044795 |  |  |
| F                                        | 0.928366  | -0.926892 | 0.926436  |  |  |
| O                                        | 2.976502  | -0.151577 | 0.446968  |  |  |
| H                                        | 3.009299  | 0.733101  | 0.847017  |  |  |
| F                                        | -0.494664 | 0.584715  | -0.669886 |  |  |
| C                                        | -1.992557 | -0.062071 | 0.032026  |  |  |
| F                                        | -2.995742 | 0.528642  | -0.555928 |  |  |
| F                                        | -1.970855 | -1.344723 | -0.192197 |  |  |
| F                                        | -1.927229 | 0.219963  | 1.303103  |  |  |
| Rotational constants (GHz):              | 1.9337200 | 0.6636600 | 0.6001200 |  |  |
| Vibrational harmonic frequencies (cm-1): |           |           |           |  |  |
| i1130.7500                               | 23.2924   |           | 38.5311   |  |  |
| 43.7886                                  | 73.9340   |           | 150.4409  |  |  |
| 181.4332                                 | 230.4892  |           | 257.4333  |  |  |
| 325.6407                                 | 361.3560  |           | 379.6501  |  |  |
| 450.2445                                 | 509.8560  |           | 537.9792  |  |  |
| 539.8998                                 | 588.7911  |           | 635.6631  |  |  |
| 704.0672                                 | 755.6148  |           | 892.5297  |  |  |
| 1050.6757                                | 1144.2081 |           | 1193.8425 |  |  |
| 1341.1067                                | 1402.4700 |           | 1408.2008 |  |  |
| 1425.7377                                | 1945.1367 |           | 3789.1528 |  |  |
| Zero-point correction (Hartree):         | 0.050988  |           |           |  |  |

TS.CFOCF2O.CFO+CF2O

-----  
E(UM062X/CC-pVDZ) (Hartree): -525.95443095  
Electronic state : 2-A  
Cartesian coordinates (Angs):

|                                          |           |           |           |  |  |
|------------------------------------------|-----------|-----------|-----------|--|--|
| C                                        | -1.039531 | 0.112075  | -0.007761 |  |  |
| C                                        | 0.812832  | 0.189336  | -0.008709 |  |  |
| F                                        | -1.284151 | -1.177678 | -0.005331 |  |  |
| O                                        | -1.797645 | 0.992345  | 0.002051  |  |  |
| F                                        | 1.073225  | -0.646974 | -1.026092 |  |  |
| F                                        | 1.051823  | -0.494449 | 1.123204  |  |  |
| O                                        | 1.021661  | 1.390587  | -0.092952 |  |  |
| Rotational constants (GHz):              | 3.8794700 | 2.4342100 | 2.0242400 |  |  |
| Vibrational harmonic frequencies (cm-1): |           |           |           |  |  |
| i519.8411                                | 14.3781   |           | 189.9886  |  |  |
| 204.7994                                 | 315.8166  |           | 407.5797  |  |  |
| 531.4701                                 | 569.2972  |           | 633.8294  |  |  |
| 695.7399                                 | 923.2170  |           | 1094.6740 |  |  |
| 1208.9550                                | 1588.8385 |           | 2053.2226 |  |  |
| Zero-point correction (Hartree):         | 0.023765  |           |           |  |  |

TS.CFOCF2OH+H2O.CFOCFO+HF+H2O.a

-----  
E(RM062X/CC-pVDZ) (Hartree): -603.03109006  
Electronic state : 1-A  
Cartesian coordinates (Angs):

|                                          |           |           |           |  |  |
|------------------------------------------|-----------|-----------|-----------|--|--|
| C                                        | -1.327952 | 0.394170  | 0.009209  |  |  |
| C                                        | 0.009839  | -0.185469 | -0.450234 |  |  |
| F                                        | -2.117850 | -0.544527 | 0.520156  |  |  |
| O                                        | -1.631129 | 1.531128  | -0.057210 |  |  |
| O                                        | 0.792385  | 0.515628  | -1.100269 |  |  |
| F                                        | -0.079502 | -1.489217 | -0.720886 |  |  |
| F                                        | 0.635827  | -0.347518 | 1.135423  |  |  |
| H                                        | 2.066310  | 0.426815  | -0.531168 |  |  |
| O                                        | 2.720935  | 0.282662  | 0.311275  |  |  |
| H                                        | 1.869993  | -0.051087 | 0.914456  |  |  |
| H                                        | 2.968572  | 1.168080  | 0.620260  |  |  |
| Rotational constants (GHz):              | 3.1362200 | 1.3814200 | 1.2691300 |  |  |
| Vibrational harmonic frequencies (cm-1): |           |           |           |  |  |
| i684.6103                                | 33.6427   |           | 55.5926   |  |  |
| 179.2564                                 | 230.1645  |           | 339.2953  |  |  |
| 369.5372                                 | 433.1576  |           | 463.9999  |  |  |
| 529.4191                                 | 541.7380  |           | 589.0019  |  |  |
| 641.9971                                 | 704.7125  |           | 736.6035  |  |  |
| 837.3321                                 | 895.7944  |           | 1166.1503 |  |  |
| 1347.5157                                | 1432.1526 |           | 1471.8233 |  |  |
| 1651.6949                                | 1754.7167 |           | 1963.3453 |  |  |
| 2013.0355                                | 2449.3264 |           | 3834.7792 |  |  |

Zero-point correction (Hartree): 0.060749

TS.CFOCF2OH+H2O.CFOCFO+HF+H2O.b

-----  
E(RM062X/CC-pVDZ) (Hartree): -603.03151100

Electronic state : 1-A

Cartesian coordinates (Angs):

|   |           |           |           |
|---|-----------|-----------|-----------|
| C | 1.382404  | -0.239831 | -0.026009 |
| C | 0.032950  | 0.417663  | -0.299537 |
| F | 1.269490  | -1.561553 | -0.141192 |
| O | 2.395243  | 0.303317  | 0.232485  |
| O | -0.699984 | -0.001504 | -1.206104 |
| F | 0.095745  | 1.723851  | -0.062151 |
| F | -0.666538 | -0.046317 | 1.191343  |
| H | -2.002863 | -0.157911 | -0.711296 |
| O | -2.692705 | -0.352250 | 0.089467  |
| H | -1.874789 | -0.256884 | 0.815081  |
| H | -2.923183 | -1.292524 | 0.030710  |

Rotational constants (GHz): 3.0718100 1.4535200 1.2498600

Vibrational harmonic frequencies (cm-1):

|           |           |           |
|-----------|-----------|-----------|
| i682.0105 | 32.6504   | 61.0537   |
| 181.1320  | 227.0616  | 344.2053  |
| 367.5631  | 422.4128  | 455.7721  |
| 528.7839  | 539.5117  | 586.5739  |
| 641.5147  | 706.6372  | 745.9918  |
| 840.0502  | 902.1744  | 1175.3860 |
| 1352.0150 | 1428.0299 | 1472.1001 |
| 1648.0759 | 1753.6226 | 1957.0270 |
| 2010.7923 | 2458.0927 | 3833.2516 |

Zero-point correction (Hartree): 0.060762

\*\*\*\*\*  
CF3OCF=CF2 + OH : M06-2X/aug-cc-pVTZ geometry  
\*\*\*\*\*

CF3

-----  
E(CCSD(T)/Aug-CC-pVDZ) (Hartree): -336.91604862  
E(CCSD/Aug-CC-pVDZ) (Hartree): -336.89690736  
T1 diagnostic: 0.016051  
E(MP2/Aug-CC-pVDZ) (Hartree): -336.88703276  
E(MP3/Aug-CC-pVDZ) (Hartree): -336.88631112  
E(PMP2/Aug-CC-pVDZ) (Hartree): -336.88789619  
E(PMP3/Aug-CC-pVDZ) (Hartree): -336.88682602  
E(PUHF/Aug-CC-pVDZ) (Hartree): -336.17416151  
E(UHF/Aug-CC-pVDZ) (Hartree): -336.17262351  
E(RHF-RMP2/AUG-CC-PVDZ) (Hartree): -336.93076910  
T1 diagnostic: 0.000481  
E(RHF-UCCSD(T)-F12a/AUG-CC-PVDZ) (Hartree): -337.20696132  
E(RHF-UCCSD(T)-F12b/AUG-CC-PVDZ) (Hartree): -337.18381127  
E(RHF-UCCSD-F12a/AUG-CC-PVDZ) (Hartree): -337.18824773  
T1 diagnostic: 0.014568  
D1 diagnostic: 0.048241  
E(RHF-UCCSD-F12b/AUG-CC-PVDZ) (Hartree): -337.16509769  
E(RHF-UCCSD-T-F12a/AUG-CC-PVDZ) (Hartree): -337.20664407  
E(RHF-UCCSD-T-F12b/AUG-CC-PVDZ) (Hartree): -337.18349403  
E(RHF-UCCSD[T]-F12a/AUG-CC-PVDZ) (Hartree): -337.20849049  
E(RHF-UCCSD[T]-F12b/AUG-CC-PVDZ) (Hartree): -337.18534045  
E(ROHF/AUG-CC-PVDZ) (Hartree): -336.17041988  
E(UM062X/Aug-CC-pVTZ) (Hartree): -337.59568155  
Electronic state : 2-A  
Cartesian coordinates (Angs):  
C -0.000050 -0.000085 0.325037  
F -1.197846 -0.359473 -0.072333  
F 0.910285 -0.857558 -0.072279  
F 0.287595 1.217087 -0.072080  
Rotational constants (GHz): 10.9547500 10.9536700 5.6693500  
Vibrational harmonic frequencies (cm-1):  
517.3827 517.6520 710.7345  
1119.4420 1310.0219 1310.3422  
Zero-point correction (Hartree): 0.012497

CF3O

-----  
E(CCSD(T)/Aug-CC-pVDZ) (Hartree): -411.98849576  
E(CCSD/Aug-CC-pVDZ) (Hartree): -411.96407794  
T1 diagnostic: 0.015334  
E(MP2/Aug-CC-pVDZ) (Hartree): -411.94476522  
E(MP3/Aug-CC-pVDZ) (Hartree): -411.95241651  
E(PMP2/Aug-CC-pVDZ) (Hartree): -411.94654256  
E(PMP3/Aug-CC-pVDZ) (Hartree): -411.95345976  
E(PUHF/Aug-CC-pVDZ) (Hartree): -411.06670151  
E(UHF/Aug-CC-pVDZ) (Hartree): -411.06361863  
E(CCSD(T)/Aug-CC-pVTZ) (Hartree): -412.33420441  
E(CCSD/Aug-CC-pVTZ) (Hartree): -412.29586238  
T1 diagnostic: 0.014074  
E(MP2/Aug-CC-pVTZ) (Hartree): -412.28571372  
E(MP3/Aug-CC-pVTZ) (Hartree): -412.28768762  
E(PMP2/Aug-CC-pVTZ) (Hartree): -412.28769056  
E(PMP3/Aug-CC-pVTZ) (Hartree): -412.28880333  
E(PUHF/Aug-CC-pVTZ) (Hartree): -411.18120075  
E(UHF/Aug-CC-pVTZ) (Hartree): -411.17773468  
E(RHF-RMP2/AUG-CC-PVDZ) (Hartree): -411.99440504  
T1 diagnostic: 0.000215  
E(RHF-UCCSD(T)-F12a/AUG-CC-PVDZ) (Hartree): -412.34303404  
E(RHF-UCCSD(T)-F12b/AUG-CC-PVDZ) (Hartree): -412.31374557  
E(RHF-UCCSD-F12a/AUG-CC-PVDZ) (Hartree): -412.31930684  
T1 diagnostic: 0.013568  
D1 diagnostic: 0.044179  
E(RHF-UCCSD-F12b/AUG-CC-PVDZ) (Hartree): -412.29001836  
E(RHF-UCCSD-T-F12a/AUG-CC-PVDZ) (Hartree): -412.34260727

E(RHF-UCCSD-T-F12b/AUG-CC-PVDZ) (Hartree): -412.31331880  
 E(RHF-UCCSD[T]-F12a/AUG-CC-PVDZ) (Hartree): -412.34474919  
 E(RHF-UCCSD[T]-F12b/AUG-CC-PVDZ) (Hartree): -412.31546072  
 E(ROHF/AUG-CC-PVDZ) (Hartree): -411.05905363  
 E(UM062X/Aug-CC-pVTZ) (Hartree): -412.82107529  
 Electronic state : 2-A  
 Cartesian coordinates (Angs):  

|   |           |           |           |
|---|-----------|-----------|-----------|
| C | 0.006571  | 0.000343  | 0.033248  |
| F | -0.772785 | -1.069473 | -0.014373 |
| F | 0.843088  | -0.010899 | -0.994138 |
| F | -0.770794 | 1.070309  | -0.035049 |
| O | 0.783124  | 0.011063  | 1.149069  |

 Rotational constants (GHz): 6.0660100 5.8857900 5.6437400  
 Vibrational harmonic frequencies (cm-1):  

|           |           |           |
|-----------|-----------|-----------|
| 267.1286  | 417.7304  | 588.9537  |
| 606.4694  | 629.1854  | 926.4697  |
| 1254.4370 | 1273.1352 | 1310.9422 |

 Zero-point correction (Hartree): 0.016572

CFOCF2

-----  
 E(CCSD(T)/Aug-CC-pVDZ) (Hartree): -449.99813181  
 E(CCSD/Aug-CC-pVDZ) (Hartree): -449.96486152  
 T1 diagnostic: 0.021485  
 E(MP2/Aug-CC-pVDZ) (Hartree): -449.94576231  
 E(MP3/Aug-CC-pVDZ) (Hartree): -449.94619591  
 E(PMP2/Aug-CC-pVDZ) (Hartree): -449.95357447  
 E(PMP3/Aug-CC-pVDZ) (Hartree): -449.95125759  
 E(PUHF/Aug-CC-pVDZ) (Hartree): -448.93111686  
 E(UHF/Aug-CC-pVDZ) (Hartree): -448.92124577  
 E(RHF-RMP2/AUG-CC-PVDZ) (Hartree): -450.00806528  
 T1 diagnostic: 0.000468  
 E(RHF-UCCSD(T)-F12a/AUG-CC-PVDZ) (Hartree): -450.38991069  
 E(RHF-UCCSD(T)-F12b/AUG-CC-PVDZ) (Hartree): -450.35663922  
 E(RHF-UCCSD-F12a/AUG-CC-PVDZ) (Hartree): -450.35709843  
 T1 diagnostic: 0.017211  
 D1 diagnostic: 0.063304  
 E(RHF-UCCSD-F12b/AUG-CC-PVDZ) (Hartree): -450.32382695  
 E(RHF-UCCSD-T-F12a/AUG-CC-PVDZ) (Hartree): -450.38926694  
 E(RHF-UCCSD-T-F12b/AUG-CC-PVDZ) (Hartree): -450.35599546  
 E(RHF-UCCSD[T]-F12a/AUG-CC-PVDZ) (Hartree): -450.39278884  
 E(RHF-UCCSD[T]-F12b/AUG-CC-PVDZ) (Hartree): -450.35951736  
 E(ROHF/AUG-CC-PVDZ) (Hartree): -448.91221652  
 E(UM062X/Aug-CC-pVTZ) (Hartree): -450.93515226  
 Point group : CS  
 Electronic state : 2-A"  
 Cartesian coordinates (Angs):  

|   |           |           |          |
|---|-----------|-----------|----------|
| C | -0.155605 | -0.774946 | 0.000000 |
| C | 0.000000  | 0.642754  | 0.000000 |
| F | 1.035812  | -1.385601 | 0.000000 |
| O | -1.190350 | -1.362945 | 0.000000 |
| F | 1.146662  | 1.248069  | 0.000000 |
| F | -1.020648 | 1.437167  | 0.000000 |

 Rotational constants (GHz): 5.7371300 3.4339200 2.1481500  
 Vibrational harmonic frequencies (cm-1):  

|                 |                 |                 |
|-----------------|-----------------|-----------------|
| 128.0493 ( A")  | 205.8804 ( A")  | 227.2438 ( A')  |
| 415.7058 ( A')  | 539.2289 ( A')  | 615.8811 ( A')  |
| 645.1764 ( A")  | 827.1702 ( A')  | 1156.3462 ( A') |
| 1447.0106 ( A') | 1565.4192 ( A') | 1828.4957 ( A') |

 Zero-point correction (Hartree): 0.021874

CFOCF2OH

-----  
 E(CCSD(T)/Aug-CC-pVDZ) (Hartree): -525.74929926  
 E(CCSD/Aug-CC-pVDZ) (Hartree): -525.70880050  
 T1 diagnostic: 0.015331  
 E(MP2/Aug-CC-pVDZ) (Hartree): -525.69623314  
 E(MP3/Aug-CC-pVDZ) (Hartree): -525.69243515  
 E(RHF/Aug-CC-pVDZ) (Hartree): -524.44082680  
 E(CCSD(T)-F12a/AUG-CC-PVDZ) (Hartree): -526.21072651  
 E(CCSD(T)-F12b/AUG-CC-PVDZ) (Hartree): -526.17054324

E(CCSD-F12a/AUG-CC-PVDZ) (Hartree): -526.17163048  
 T1 diagnostic: 0.013498  
 D1 diagnostic: 0.048046  
 E(CCSD-F12b/AUG-CC-PVDZ) (Hartree): -526.13144721  
 E(CCSD-T-F12a/AUG-CC-PVDZ) (Hartree): -526.20995940  
 E(CCSD-T-F12b/AUG-CC-PVDZ) (Hartree): -526.16977613  
 E(CCSD[T]-F12a/AUG-CC-PVDZ) (Hartree): -526.21358603  
 E(CCSD[T]-F12b/AUG-CC-PVDZ) (Hartree): -526.17340276  
 E(RHF/AUG-CC-PVDZ) (Hartree): -524.44082679  
 E(RM062X/Aug-CC-pVTZ) (Hartree): -526.84003187  
 Electronic state : 1-A  
 Cartesian coordinates (Angs):  
 C 0.929047 0.134498 -0.000171  
 C -0.607494 0.021071 -0.000078  
 F 1.509983 -1.046438 -0.000278  
 O 1.519779 1.153804 0.000040  
 F -0.978647 -0.691862 1.078483  
 F -0.979141 -0.694302 -1.076682  
 O -1.192509 1.226434 -0.001584  
 H -0.517234 1.918099 0.000146  
 Rotational constants (GHz): 3.8203600 2.5446700 2.0827900  
 Vibrational harmonic frequencies (cm-1):  
 33.3716 210.5089 241.1353  
 305.5466 397.5701 441.0268  
 529.8981 613.8764 702.6013  
 787.4974 836.8157 1102.3224  
 1187.8995 1248.4435 1341.6037  
 1456.1852 1962.9970 3803.7008  
 Zero-point correction (Hartree): 0.039191

CFOCFO

-----  
 E(CCSD(T)/Aug-CC-pVDZ) (Hartree): -425.47323729  
 E(CCSD/Aug-CC-pVDZ) (Hartree): -425.43606739  
 T1 diagnostic: 0.016755  
 E(MP2/Aug-CC-pVDZ) (Hartree): -425.43116557  
 E(MP3/Aug-CC-pVDZ) (Hartree): -425.42066496  
 E(RHF/Aug-CC-pVDZ) (Hartree): -424.39234723  
 E(CCSD(T)-F12a/AUG-CC-PVDZ) (Hartree): -425.84644472  
 E(CCSD(T)-F12b/AUG-CC-PVDZ) (Hartree): -425.81388459  
 E(CCSD-F12a/AUG-CC-PVDZ) (Hartree): -425.81073389  
 T1 diagnostic: 0.015542  
 D1 diagnostic: 0.046093  
 E(CCSD-F12b/AUG-CC-PVDZ) (Hartree): -425.77817376  
 E(CCSD-T-F12a/AUG-CC-PVDZ) (Hartree): -425.84556309  
 E(CCSD-T-F12b/AUG-CC-PVDZ) (Hartree): -425.81300296  
 E(CCSD[T]-F12a/AUG-CC-PVDZ) (Hartree): -425.84950321  
 E(CCSD[T]-F12b/AUG-CC-PVDZ) (Hartree): -425.81694308  
 E(RHF/AUG-CC-PVDZ) (Hartree): -424.39234723  
 E(RM062X/Aug-CC-pVTZ) (Hartree): -426.36655918  
 Point group : CS  
 Electronic state : 1-A'  
 Cartesian coordinates (Angs):  
 C 0.000000 0.766517 0.000000  
 C -0.000005 -0.766518 0.000000  
 O -0.950757 1.452662 0.000000  
 O 0.950759 -1.452655 0.000000  
 F 1.239417 1.218915 0.000000  
 F -1.239416 -1.218919 0.000000  
 Rotational constants (GHz): 6.0128900 3.5767100 2.2426700  
 Vibrational harmonic frequencies (cm-1):  
 52.2591 ( A'') 250.5281 ( A') 422.5548 ( A')  
 458.8021 ( A'') 536.7023 ( A') 693.7135 ( A')  
 835.7030 ( A'') 839.3270 ( A') 1173.8611 ( A')  
 1335.5356 ( A') 1976.6718 ( A') 1977.9391 ( A')  
 Zero-point correction (Hartree): 0.024043

CFO

-----  
 E(CCSD(T)/Aug-CC-pVDZ) (Hartree): -212.66782019  
 E(CCSD/Aug-CC-pVDZ) (Hartree): -212.64990301

T1 diagnostic: 0.022821  
E(MP2/Aug-CC-pVDZ) (Hartree): -212.64389186  
E(MP3/Aug-CC-pVDZ) (Hartree): -212.63876694  
E(PMP2/Aug-CC-pVDZ) (Hartree): -212.64672252  
E(PMP3/Aug-CC-pVDZ) (Hartree): -212.64064141  
E(PUHF/Aug-CC-pVDZ) (Hartree): -212.14496698  
E(UHF/Aug-CC-pVDZ) (Hartree): -212.14114534  
E(RHF-RMP2/AUG-CC-PVDZ) (Hartree): -212.67245338  
T1 diagnostic: 0.000793  
E(RHF-UCCSD(T)-F12a/AUG-CC-PVDZ) (Hartree): -212.85268665  
E(RHF-UCCSD(T)-F12b/AUG-CC-PVDZ) (Hartree): -212.83667697  
E(RHF-UCCSD-F12a/AUG-CC-PVDZ) (Hartree): -212.83520252  
T1 diagnostic: 0.023178  
D1 diagnostic: 0.068730  
E(RHF-UCCSD-F12b/AUG-CC-PVDZ) (Hartree): -212.81919284  
E(RHF-UCCSD-T-F12a/AUG-CC-PVDZ) (Hartree): -212.85218889  
E(RHF-UCCSD-T-F12b/AUG-CC-PVDZ) (Hartree): -212.83617920  
E(RHF-UCCSD[T]-F12a/AUG-CC-PVDZ) (Hartree): -212.85482458  
E(RHF-UCCSD[T]-F12b/AUG-CC-PVDZ) (Hartree): -212.83881490  
E(ROHF/AUG-CC-PVDZ) (Hartree): -212.13632136  
E(UM062X/Aug-CC-pVTZ) (Hartree): -213.11139379  
Point group : CS  
Electronic state : 2-A'  
Cartesian coordinates (Angs):  
C 0.000000 0.418366 0.000000  
F -1.008812 -0.433873 0.000000  
O 1.134913 0.174333 0.000000  
Rotational constants (GHz): 192.1730700 11.6329400 10.9689500  
Vibrational harmonic frequencies (cm-1):  
650.9356 ( A') 1091.2606 ( A') 1982.8252 ( A')  
Zero-point correction (Hartree): 0.008486

F  
-----  
E(CCSD(T)/Aug-CC-pVDZ) (Hartree): -99.55006944  
E(CCSD/Aug-CC-pVDZ) (Hartree): -99.54774893  
T1 diagnostic: 0.009722  
E(MP2/Aug-CC-pVDZ) (Hartree): -99.53569906  
E(MP3/Aug-CC-pVDZ) (Hartree): -99.54577504  
E(PMP2/Aug-CC-pVDZ) (Hartree): -99.53706645  
E(PMP3/Aug-CC-pVDZ) (Hartree): -99.54652791  
E(PUHF/Aug-CC-pVDZ) (Hartree): -99.38373494  
E(UHF/Aug-CC-pVDZ) (Hartree): -99.38109179  
E(UM062X/Aug-CC-pVTZ) (Hartree): -99.73232189  
Point group : OH  
Cartesian coordinates (Angs):  
F 0.000000 0.000000 0.000000  
Zero-point correction (Hartree): 0.000000

HF  
-----  
E(CCSD(T)/Aug-CC-pVDZ) (Hartree): -100.26362258  
E(CCSD/Aug-CC-pVDZ) (Hartree): -100.25947091  
T1 diagnostic: 0.012484  
E(MP2/Aug-CC-pVDZ) (Hartree): -100.25577890  
E(MP3/Aug-CC-pVDZ) (Hartree): -100.25644635  
E(RHF/Aug-CC-pVDZ) (Hartree): -100.03333500  
E(CCSD(T)-F12a/AUG-CC-PVDZ) (Hartree): -100.34962473  
E(CCSD(T)-F12b/AUG-CC-PVDZ) (Hartree): -100.34247742  
E(CCSD-F12a/AUG-CC-PVDZ) (Hartree): -100.34547449  
T1 diagnostic: 0.008822  
D1 diagnostic: 0.014652  
E(CCSD-F12b/AUG-CC-PVDZ) (Hartree): -100.33832718  
E(CCSD-T-F12a/AUG-CC-PVDZ) (Hartree): -100.34965408  
E(CCSD-T-F12b/AUG-CC-PVDZ) (Hartree): -100.34250677  
E(CCSD[T]-F12a/AUG-CC-PVDZ) (Hartree): -100.34978276  
E(CCSD[T]-F12b/AUG-CC-PVDZ) (Hartree): -100.34263545  
E(RHF/AUG-CC-PVDZ) (Hartree): -100.03333500  
E(RM062X/Aug-CC-pVTZ) (Hartree): -100.45301335  
Point group : C\*V  
Electronic state : 1-SG

Cartesian coordinates (Angs):  
F 0.000000 0.000000 0.091997  
H 0.000000 0.000000 -0.827973  
Rotational constants (GHz): 0.0000000 623.9250717 623.9250717  
Vibrational harmonic frequencies (cm-1):  
4159.7924 ( SG)  
Zero-point correction (Hartree): 0.009477

O2

-----  
E(CCSD(T)/Aug-CC-pVDZ) (Hartree): -150.01974010  
E(CCSD/Aug-CC-pVDZ) (Hartree): -150.00798598  
T1 diagnostic: 0.017237  
E(MP2/Aug-CC-pVDZ) (Hartree): -150.00187910  
E(MP3/Aug-CC-pVDZ) (Hartree): -149.99995982  
E(PMP2/Aug-CC-pVDZ) (Hartree): -150.00860413  
E(PMP3/Aug-CC-pVDZ) (Hartree): -150.00309231  
E(PUHF/Aug-CC-pVDZ) (Hartree): -149.65562822  
E(UHF/Aug-CC-pVDZ) (Hartree): -149.64482689  
E(RHF-RMP2/AUG-CC-PVDZ) (Hartree): -150.03256052  
T1 diagnostic: 0.001007  
E(RHF-UCCSD(T)-F12a/AUG-CC-PVDZ) (Hartree): -150.14485938  
E(RHF-UCCSD(T)-F12b/AUG-CC-PVDZ) (Hartree): -150.13379610  
E(RHF-UCCSD-F12a/AUG-CC-PVDZ) (Hartree): -150.13259123  
T1 diagnostic: 0.009707  
D1 diagnostic: 0.016332  
E(RHF-UCCSD-F12b/AUG-CC-PVDZ) (Hartree): -150.12152796  
E(RHF-UCCSD-T-F12a/AUG-CC-PVDZ) (Hartree): -150.14458503  
E(RHF-UCCSD-T-F12b/AUG-CC-PVDZ) (Hartree): -150.13352175  
E(RHF-UCCSD[T]-F12a/AUG-CC-PVDZ) (Hartree): -150.14450572  
E(RHF-UCCSD[T]-F12b/AUG-CC-PVDZ) (Hartree): -150.13344245  
E(ROHF/AUG-CC-PVDZ) (Hartree): -149.62284252  
E(UM062X/Aug-CC-pVTZ) (Hartree): -150.32479538

Point group : D\*H

Electronic state : 3-SGG

Cartesian coordinates (Angs):  
O 0.000000 0.000000 0.594925  
O 0.000000 0.000000 -0.594925  
Rotational constants (GHz): 0.0000000 44.6355313 44.6355313  
Vibrational harmonic frequencies (cm-1):  
1754.4580 ( SGG)  
Zero-point correction (Hartree): 0.003997

OH

-----  
E(CCSD(T)/Aug-CC-pVDZ) (Hartree): -75.58403081  
E(CCSD/Aug-CC-pVDZ) (Hartree): -75.58066519  
T1 diagnostic: 0.012131  
E(MP2/Aug-CC-pVDZ) (Hartree): -75.56556372  
E(MP3/Aug-CC-pVDZ) (Hartree): -75.57786120  
E(PMP2/Aug-CC-pVDZ) (Hartree): -75.56732589  
E(PMP3/Aug-CC-pVDZ) (Hartree): -75.57892392  
E(PUHF/Aug-CC-pVDZ) (Hartree): -75.40650427  
E(UHF/Aug-CC-pVDZ) (Hartree): -75.40357810  
E(RHF-RMP2/AUG-CC-PVDZ) (Hartree): -75.57183096  
T1 diagnostic: 0.000130  
E(RHF-UCCSD(T)-F12a/AUG-CC-PVDZ) (Hartree): -75.64685987  
E(RHF-UCCSD(T)-F12b/AUG-CC-PVDZ) (Hartree): -75.64057201  
E(RHF-UCCSD-F12a/AUG-CC-PVDZ) (Hartree): -75.64358240  
T1 diagnostic: 0.008897  
D1 diagnostic: 0.015262  
E(RHF-UCCSD-F12b/AUG-CC-PVDZ) (Hartree): -75.63729455  
E(RHF-UCCSD-T-F12a/AUG-CC-PVDZ) (Hartree): -75.64687263  
E(RHF-UCCSD-T-F12b/AUG-CC-PVDZ) (Hartree): -75.64058478  
E(RHF-UCCSD[T]-F12a/AUG-CC-PVDZ) (Hartree): -75.64693076  
E(RHF-UCCSD[T]-F12b/AUG-CC-PVDZ) (Hartree): -75.64064291  
E(ROHF/AUG-CC-PVDZ) (Hartree): -75.39925405  
E(UM062X/Aug-CC-pVTZ) (Hartree): -75.73381011

Point group : C\*V

Cartesian coordinates (Angs):  
O 0.000000 0.000000 0.108021

```

      H      0.000000      0.000000      -0.864170
Rotational constants (GHz):      0.0000000  563.9825141  563.9825141
Vibrational harmonic frequencies (cm-1):
      3766.2002 ( SG)
Zero-point correction (Hartree): 0.008580

FO2
-----
E(CCSD(T)/Aug-CC-pVDZ) (Hartree): -249.57802139
E(CCSD/Aug-CC-pVDZ) (Hartree): -249.55129982
  T1 diagnostic: 0.040624
E(MP2/Aug-CC-pVDZ) (Hartree): -249.53506491
E(MP3/Aug-CC-pVDZ) (Hartree): -249.52903895
E(PMP2/Aug-CC-pVDZ) (Hartree): -249.53879473
E(PMP3/Aug-CC-pVDZ) (Hartree): -249.53124506
E(PUHF/Aug-CC-pVDZ) (Hartree): -248.94171267
E(UHF/Aug-CC-pVDZ) (Hartree): -248.93634014
E(RHF-RMP2/AUG-CC-PVDZ) (Hartree): -249.56305878
  T1 diagnostic: 0.000845
E(RHF-UCCSD(T)-F12a/AUG-CC-PVDZ) (Hartree): -249.78791795
E(RHF-UCCSD(T)-F12b/AUG-CC-PVDZ) (Hartree): -249.76938471
E(RHF-UCCSD-F12a/AUG-CC-PVDZ) (Hartree): -249.76217378
  T1 diagnostic: 0.042129
  D1 diagnostic: 0.138980
E(RHF-UCCSD-F12b/AUG-CC-PVDZ) (Hartree): -249.74364053
E(RHF-UCCSD-T-F12a/AUG-CC-PVDZ) (Hartree): -249.78758819
E(RHF-UCCSD-T-F12b/AUG-CC-PVDZ) (Hartree): -249.76905495
E(RHF-UCCSD[T]-F12a/AUG-CC-PVDZ) (Hartree): -249.79135691
E(RHF-UCCSD[T]-F12b/AUG-CC-PVDZ) (Hartree): -249.77282367
E(ROHF/AUG-CC-PVDZ) (Hartree): -248.92908639
E(UM062X/Aug-CC-pVTZ) (Hartree): -250.06141196
Point group : CS
Electronic state : 2-A"
Cartesian coordinates (Angs):
      F      -0.990182      -0.605894      0.000000
      O      0.000000      0.548845      0.000000
      O      1.113954      0.132785      0.000000
Rotational constants (GHz):      81.4651100  11.4030800  10.0029200
Vibrational harmonic frequencies (cm-1):
      436.8240 ( A')      671.6464 ( A')      1523.0971 ( A')
Zero-point correction (Hartree): 0.005995

```

```

CF4
-----
E(CCSD(T)/Aug-CC-pVDZ) (Hartree): -436.66486364
E(CCSD/Aug-CC-pVDZ) (Hartree): -436.64021317
  T1 diagnostic: 0.013058
E(MP2/Aug-CC-pVDZ) (Hartree): -436.63214204
E(MP3/Aug-CC-pVDZ) (Hartree): -436.62942215
E(RHF/Aug-CC-pVDZ) (Hartree): -435.69485173
E(CCSD(T)-F12a/AUG-CC-PVDZ) (Hartree): -437.04452276
E(CCSD(T)-F12b/AUG-CC-PVDZ) (Hartree): -437.01456001
E(CCSD-F12a/AUG-CC-PVDZ) (Hartree): -437.02052419
  T1 diagnostic: 0.010845
  D1 diagnostic: 0.027692
E(CCSD-F12b/AUG-CC-PVDZ) (Hartree): -436.99056143
E(CCSD-T-F12a/AUG-CC-PVDZ) (Hartree): -437.04412895
E(CCSD-T-F12b/AUG-CC-PVDZ) (Hartree): -437.01416620
E(CCSD[T]-F12a/AUG-CC-PVDZ) (Hartree): -437.04602440
E(CCSD[T]-F12b/AUG-CC-PVDZ) (Hartree): -437.01606165
E(RHF/AUG-CC-PVDZ) (Hartree): -435.69485172
E(RM062X/Aug-CC-pVTZ) (Hartree): -437.53902683
Point group : CS
Electronic state : 1-A'
Cartesian coordinates (Angs):
      C      -0.000011      0.000013      0.000000
      F      -1.075299      0.760407      0.000000
      F      1.075327      0.760333      0.000000
      F      -0.000011      -0.760374      1.075325
      F      -0.000011      -0.760374      -1.075325
Rotational constants (GHz):      5.7513200  5.7512700  5.7511800

```



Vibrational harmonic frequencies (cm-1):

|                  |                 |                 |
|------------------|-----------------|-----------------|
| 438.8158 ( A')   | 439.1734 ( A'') | 636.8057 ( A')  |
| 637.0667 ( A'')  | 637.0717 ( A')  | 941.5475 ( A')  |
| 1320.6264 ( A'') | 1320.7493 ( A') | 1321.2840 ( A') |

Zero-point correction (Hartree): 0.017526

HCF3

-----

E(CCSD(T)/Aug-CC-pVDZ) (Hartree): -337.59215799  
E(CCSD/Aug-CC-pVDZ) (Hartree): -337.57256318  
T1 diagnostic: 0.013587  
E(MP2/Aug-CC-pVDZ) (Hartree): -337.56049378  
E(MP3/Aug-CC-pVDZ) (Hartree): -337.56277752  
E(RHF/Aug-CC-pVDZ) (Hartree): -336.81510309  
E(CCSD(T)-F12a/AUG-CC-PVDZ) (Hartree): -337.88713544  
E(CCSD(T)-F12b/AUG-CC-PVDZ) (Hartree): -337.86291101  
E(CCSD-F12a/AUG-CC-PVDZ) (Hartree): -337.86802468  
T1 diagnostic: 0.011165  
D1 diagnostic: 0.027248  
E(CCSD-F12b/AUG-CC-PVDZ) (Hartree): -337.84380025  
E(CCSD-T-F12a/AUG-CC-PVDZ) (Hartree): -337.88684220  
E(CCSD-T-F12b/AUG-CC-PVDZ) (Hartree): -337.86261776  
E(CCSD[T]-F12a/AUG-CC-PVDZ) (Hartree): -337.88837738  
E(CCSD[T]-F12b/AUG-CC-PVDZ) (Hartree): -337.86415295  
E(RHF/AUG-CC-PVDZ) (Hartree): -336.81510309  
E(RM062X/Aug-CC-pVTZ) (Hartree): -338.27266965  
Electronic state : 1-A  
Cartesian coordinates (Angs):

|   |           |           |           |
|---|-----------|-----------|-----------|
| C | 0.000087  | -0.000124 | 0.340583  |
| F | -0.798904 | -0.956222 | -0.128595 |
| F | 1.227729  | -0.213570 | -0.128578 |
| F | -0.428866 | 1.169883  | -0.128547 |
| H | -0.000157 | -0.000077 | 1.427986  |

Rotational constants (GHz): 10.4024900 10.3988600 5.7107400  
Vibrational harmonic frequencies (cm-1):

|           |           |           |
|-----------|-----------|-----------|
| 515.0152  | 515.2700  | 712.2913  |
| 1172.3039 | 1200.9083 | 1201.6049 |
| 1414.1147 | 1414.2983 | 3178.9846 |

Zero-point correction (Hartree): 0.025800

FNO

-----

E(CCSD(T)/Aug-CC-pVDZ) (Hartree): -229.26335692  
E(CCSD/Aug-CC-pVDZ) (Hartree): -229.23913560  
T1 diagnostic: 0.022157  
E(MP2/Aug-CC-pVDZ) (Hartree): -229.23987876  
E(MP3/Aug-CC-pVDZ) (Hartree): -229.22602153  
E(RHF/Aug-CC-pVDZ) (Hartree): -228.65800609  
E(CCSD(T)-F12a/AUG-CC-PVDZ) (Hartree): -229.45853503  
E(CCSD(T)-F12b/AUG-CC-PVDZ) (Hartree): -229.44115566  
E(CCSD-F12a/AUG-CC-PVDZ) (Hartree): -229.43538718  
T1 diagnostic: 0.021528  
D1 diagnostic: 0.060852  
E(CCSD-F12b/AUG-CC-PVDZ) (Hartree): -229.41800781  
E(CCSD-T-F12a/AUG-CC-PVDZ) (Hartree): -229.45773443  
E(CCSD-T-F12b/AUG-CC-PVDZ) (Hartree): -229.44035505  
E(CCSD[T]-F12a/AUG-CC-PVDZ) (Hartree): -229.46128411  
E(CCSD[T]-F12b/AUG-CC-PVDZ) (Hartree): -229.44390474  
E(RHF/AUG-CC-PVDZ) (Hartree): -228.65800609  
E(RM062X/Aug-CC-pVTZ) (Hartree): -229.72011450  
Point group : CS  
Electronic state : 1-A'  
Cartesian coordinates (Angs):

|   |           |           |          |
|---|-----------|-----------|----------|
| F | -0.940989 | -0.579405 | 0.000000 |
| N | 0.000000  | 0.551202  | 0.000000 |
| O | 1.058613  | 0.169529  | 0.000000 |

Rotational constants (GHz): 97.6744100 12.4354500 11.0310300  
Vibrational harmonic frequencies (cm-1):

|                |                |                 |
|----------------|----------------|-----------------|
| 580.8086 ( A') | 827.3994 ( A') | 1981.8837 ( A') |
|----------------|----------------|-----------------|

Zero-point correction (Hartree): 0.007723

NO

-----  
E(CCSD(T)/Aug-CC-pVDZ) (Hartree): -129.62340013  
E(CCSD/Aug-CC-pVDZ) (Hartree): -129.61043015  
T1 diagnostic: 0.022643  
E(MP2/Aug-CC-pVDZ) (Hartree): -129.60198234  
E(MP3/Aug-CC-pVDZ) (Hartree): -129.60094805  
E(PMP2/Aug-CC-pVDZ) (Hartree): -129.60591473  
E(PMP3/Aug-CC-pVDZ) (Hartree): -129.60340171  
E(PUHF/Aug-CC-pVDZ) (Hartree): -129.27660045  
E(UHF/Aug-CC-pVDZ) (Hartree): -129.27121024  
E(RHF-RMP2/AUG-CC-PVDZ) (Hartree): -129.61991150  
T1 diagnostic: 0.000669  
E(RHF-UCCSD(T)-F12a/AUG-CC-PVDZ) (Hartree): -129.73304160  
E(RHF-UCCSD(T)-F12b/AUG-CC-PVDZ) (Hartree): -129.72263170  
E(RHF-UCCSD-F12a/AUG-CC-PVDZ) (Hartree): -129.72039356  
T1 diagnostic: 0.020809  
D1 diagnostic: 0.045520  
E(RHF-UCCSD-F12b/AUG-CC-PVDZ) (Hartree): -129.70998366  
E(RHF-UCCSD-T-F12a/AUG-CC-PVDZ) (Hartree): -129.73269619  
E(RHF-UCCSD-T-F12b/AUG-CC-PVDZ) (Hartree): -129.72228629  
E(RHF-UCCSD[T]-F12a/AUG-CC-PVDZ) (Hartree): -129.73424813  
E(RHF-UCCSD[T]-F12b/AUG-CC-PVDZ) (Hartree): -129.72383822  
E(ROHF/AUG-CC-PVDZ) (Hartree): -129.26419668  
E(UM062X/Aug-CC-pVTZ) (Hartree): -129.89335138  
Point group : C\*v  
Cartesian coordinates (Angs):  
N 0.000000 0.000000 -0.606410  
O 0.000000 0.000000 0.530609  
Rotational constants (GHz): 0.0000000 52.3561998 52.3561998  
Vibrational harmonic frequencies (cm-1):  
2066.0391 ( SG)  
Zero-point correction (Hartree): 0.004707

CF2O

-----  
E(CCSD(T)/Aug-CC-pVDZ) (Hartree): -312.40224471  
E(CCSD/Aug-CC-pVDZ) (Hartree): -312.37961809  
T1 diagnostic: 0.015319  
E(MP2/Aug-CC-pVDZ) (Hartree): -312.37639437  
E(MP3/Aug-CC-pVDZ) (Hartree): -312.36978218  
E(RHF/Aug-CC-pVDZ) (Hartree): -311.65523696  
E(CCSD(T)-F12a/AUG-CC-PVDZ) (Hartree): -312.67659354  
E(CCSD(T)-F12b/AUG-CC-PVDZ) (Hartree): -312.65401106  
E(CCSD-F12a/AUG-CC-PVDZ) (Hartree): -312.65478245  
T1 diagnostic: 0.014042  
D1 diagnostic: 0.045636  
E(CCSD-F12b/AUG-CC-PVDZ) (Hartree): -312.63219997  
E(CCSD-T-F12a/AUG-CC-PVDZ) (Hartree): -312.67611355  
E(CCSD-T-F12b/AUG-CC-PVDZ) (Hartree): -312.65353107  
E(CCSD[T]-F12a/AUG-CC-PVDZ) (Hartree): -312.67831177  
E(CCSD[T]-F12b/AUG-CC-PVDZ) (Hartree): -312.65572929  
E(RHF/AUG-CC-PVDZ) (Hartree): -311.65523696  
E(RM062X/Aug-CC-pVTZ) (Hartree): -313.04496676  
Point group : C2v  
Electronic state : 1-A1  
Cartesian coordinates (Angs):  
C 0.000000 0.000000 0.141685  
O 0.000000 0.000000 1.308682  
F 0.000000 1.057949 -0.628865  
F 0.000000 -1.057949 -0.628865  
Rotational constants (GHz): 11.8834000 11.8530400 5.9341000  
Vibrational harmonic frequencies (cm-1):  
589.8658 631.4124 797.9617  
1010.4306 1300.3034 2020.6839  
Zero-point correction (Hartree): 0.014468

H2O

-----  
E(CCSD(T)/Aug-CC-pVDZ) (Hartree): -76.27377604  
E(CCSD/Aug-CC-pVDZ) (Hartree): -76.26855934

T1 diagnostic: 0.012284  
E(MP2/Aug-CC-pVDZ) (Hartree): -76.26079349  
E(MP3/Aug-CC-pVDZ) (Hartree): -76.26553289  
E(RHF/Aug-CC-pVDZ) (Hartree): -76.04133056  
E(CCSD(T)-F12a/AUG-CC-PVDZ) (Hartree): -76.34547905  
E(CCSD(T)-F12b/AUG-CC-PVDZ) (Hartree): -76.33832353  
E(CCSD-F12a/AUG-CC-PVDZ) (Hartree): -76.34048177  
T1 diagnostic: 0.009595  
D1 diagnostic: 0.017559  
E(CCSD-F12b/AUG-CC-PVDZ) (Hartree): -76.33332624  
E(CCSD-T-F12a/AUG-CC-PVDZ) (Hartree): -76.34547247  
E(CCSD-T-F12b/AUG-CC-PVDZ) (Hartree): -76.33831694  
E(CCSD[T]-F12a/AUG-CC-PVDZ) (Hartree): -76.34566631  
E(CCSD[T]-F12b/AUG-CC-PVDZ) (Hartree): -76.33851078  
E(RHF/AUG-CC-PVDZ) (Hartree): -76.04133056  
E(RM062X/Aug-CC-pVTZ) (Hartree): -76.43010673  
Point group : C2V  
Electronic state : 1-A1  
Cartesian coordinates (Angs):  
O 0.000000 0.000000 0.116390  
H 0.000000 0.762470 -0.465561  
H 0.000000 -0.762470 -0.465561  
Rotational constants (GHz): 833.6308100 431.2772300 284.2309300  
Vibrational harmonic frequencies (cm-1):  
1619.5204 3869.6600 3972.6125  
Zero-point correction (Hartree): 0.021556

CF3OH

-----  
E(CCSD(T)/Aug-CC-pVDZ) (Hartree): -412.68034333  
E(CCSD/Aug-CC-pVDZ) (Hartree): -412.65448293  
T1 diagnostic: 0.013152  
E(MP2/Aug-CC-pVDZ) (Hartree): -412.64325767  
E(MP3/Aug-CC-pVDZ) (Hartree): -412.64377238  
E(RHF/Aug-CC-pVDZ) (Hartree): -411.70621449  
E(CCSD(T)-F12a/AUG-CC-PVDZ) (Hartree): -413.04287317  
E(CCSD(T)-F12b/AUG-CC-PVDZ) (Hartree): -413.01274678  
E(CCSD-F12a/AUG-CC-PVDZ) (Hartree): -413.01779508  
T1 diagnostic: 0.010914  
D1 diagnostic: 0.029502  
E(CCSD-F12b/AUG-CC-PVDZ) (Hartree): -412.98766869  
E(CCSD-T-F12a/AUG-CC-PVDZ) (Hartree): -413.04249503  
E(CCSD-T-F12b/AUG-CC-PVDZ) (Hartree): -413.01236864  
E(CCSD[T]-F12a/AUG-CC-PVDZ) (Hartree): -413.04432387  
E(CCSD[T]-F12b/AUG-CC-PVDZ) (Hartree): -413.01419748  
E(RHF/AUG-CC-PVDZ) (Hartree): -411.70621449  
E(RM062X/Aug-CC-pVTZ) (Hartree): -413.51933257  
Electronic state : 1-A  
Cartesian coordinates (Angs):  
C -0.004770 0.022374 0.000027  
F 0.264983 -0.731883 -1.071617  
F 0.269124 -0.728063 1.073263  
F 0.807798 1.062014 -0.003307  
O -1.271624 0.466482 0.001623  
H -1.875528 -0.284719 0.001796  
Rotational constants (GHz): 5.7367500 5.6817300 5.6378500  
Vibrational harmonic frequencies (cm-1):  
251.7883 445.3654 455.5775  
608.3323 630.1886 642.8287  
931.0605 1132.7543 1223.7762  
1326.0300 1432.5993 3857.2159  
Zero-point correction (Hartree): 0.029474

CF3OCF2

-----  
E(CCSD(T)/Aug-CC-pVDZ) (Hartree): -787.00837175  
E(CCSD/Aug-CC-pVDZ) (Hartree): -786.95343314  
T1 diagnostic: 0.013967  
E(MP2/Aug-CC-pVDZ) (Hartree): -786.93380512  
E(MP3/Aug-CC-pVDZ) (Hartree): -786.93357391  
E(RHF/Aug-CC-pVDZ) (Hartree): -785.14914490

E(CCSD(T)-F12a/AUG-CC-PVDZ) (Hartree): -787.69440603  
 E(CCSD(T)-F12b/AUG-CC-PVDZ) (Hartree): -787.63710232  
 E(CCSD-F12a/AUG-CC-PVDZ) (Hartree): -787.64116203  
   T1 diagnostic: 0.012171  
   D1 diagnostic: 0.036034  
 E(CCSD-F12b/AUG-CC-PVDZ) (Hartree): -787.58385832  
 E(CCSD-T-F12a/AUG-CC-PVDZ) (Hartree): -787.69354502  
 E(CCSD-T-F12b/AUG-CC-PVDZ) (Hartree): -787.63624131  
 E(CCSD[T]-F12a/AUG-CC-PVDZ) (Hartree): -787.69767868  
 E(CCSD[T]-F12b/AUG-CC-PVDZ) (Hartree): -787.64037497  
 E(RHF/AUG-CC-PVDZ) (Hartree): -785.14914490  
 E(RM062X/Aug-CC-pVTZ) (Hartree): -788.62828972  
 Electronic state : 1-A  
 Cartesian coordinates (Angs):  
   C    1.688942   -0.285791   -0.062739  
   C    0.700416    0.547437   -0.322426  
   O   -0.480816    0.152285   -0.855667  
   F    0.829571    1.851845   -0.147668  
   C   -1.486193   -0.110863    0.040109  
   F   -1.715822    0.926726    0.833412  
   F   -1.185912   -1.150646    0.807160  
   F   -2.568138   -0.380648   -0.654268  
   F    1.609467   -1.579624   -0.233086  
   F    2.856115    0.096460    0.385080  
 Rotational constants (GHz):    2.3722300    0.9247100    0.7685300  
 Vibrational harmonic frequencies (cm-1):  
   37.5078           74.7467           120.8240  
  198.0165          213.2699          344.4227  
  369.4525          445.6470          470.1532  
  544.6117          557.0763          614.0070  
  643.3737          651.5821          727.8200  
  849.3273          945.4895          1219.7324  
  1240.0152         1268.3436          1345.5522  
  1364.9966         1401.8671          1937.4241  
 Zero-point correction (Hartree): 0.040062

CF3OCFCF2OH.b

-----  
 E(CCSD(T)/Aug-CC-pVDZ) (Hartree): -862.67940195  
 E(CCSD/Aug-CC-pVDZ) (Hartree): -862.61985276  
   T1 diagnostic: 0.015011  
 E(MP2/Aug-CC-pVDZ) (Hartree): -862.59333768  
 E(MP3/Aug-CC-pVDZ) (Hartree): -862.59527210  
 E(PMP2/Aug-CC-pVDZ) (Hartree): -862.59481043  
 E(PMP3/Aug-CC-pVDZ) (Hartree): -862.59616170  
 E(PUHF/Aug-CC-pVDZ) (Hartree): -860.62487051  
 E(UHF/Aug-CC-pVDZ) (Hartree): -860.62247052  
 E(UM062X/Aug-CC-pVTZ) (Hartree): -864.45363994  
 Electronic state : 2-A  
 Cartesian coordinates (Angs):  
   C    1.518734   -0.252099   -0.020518  
   C    0.533475    0.767904   -0.565023  
   O   -0.712525    0.387214   -0.947776  
   F    0.570982    1.928007    0.060637  
   C   -1.599449   -0.095831   -0.027759  
   F   -1.644657    0.650552    1.064778  
   F   -1.267976   -1.337953    0.353610  
   F   -2.783372   -0.136948   -0.589199  
   F    1.450197   -1.344777   -0.808124  
   O    1.345658   -0.587610    1.287134  
   F    2.740312    0.275692   -0.126404  
   H    0.629000   -1.227850    1.367257  
 Rotational constants (GHz):    1.9736900    0.8326600    0.7393400  
 Vibrational harmonic frequencies (cm-1):  
   30.0127           73.9088           118.6704  
  161.3775          201.9144          217.8709  
  249.0447          325.6431          356.8960  
  430.3517          479.6864          510.7112  
  554.5476          586.4402          630.1259  
  638.1139          688.3116          756.0145  
  820.2984          918.7688          1113.7329

|           |           |           |
|-----------|-----------|-----------|
| 1133.7301 | 1201.5724 | 1230.6017 |
| 1244.8910 | 1331.3237 | 1348.5507 |
| 1380.4784 | 1422.2351 | 3850.6365 |

Zero-point correction (Hartree): 0.054691

CF3OCFCF2OH

-----

E (CCSD(T)/Aug-CC-pVDZ) (Hartree): -862.67938565  
E (CCSD/Aug-CC-pVDZ) (Hartree): -862.61998113  
T1 diagnostic: 0.014933  
E (MP2/Aug-CC-pVDZ) (Hartree): -862.59347533  
E (MP3/Aug-CC-pVDZ) (Hartree): -862.59540270  
E (PMP2/Aug-CC-pVDZ) (Hartree): -862.59495995  
E (PMP3/Aug-CC-pVDZ) (Hartree): -862.59629719  
E (PUHF/Aug-CC-pVDZ) (Hartree): -860.62565487  
E (UHF/Aug-CC-pVDZ) (Hartree): -860.62324094  
E (UM062X/Aug-CC-pVTZ) (Hartree): -864.45383120  
Electronic state : 2-A  
Cartesian coordinates (Angs):

|   |           |           |           |
|---|-----------|-----------|-----------|
| C | 1.510545  | -0.281409 | -0.045150 |
| C | 0.536932  | 0.730124  | -0.609555 |
| O | -0.721333 | 0.397795  | -0.950609 |
| F | 0.651089  | 1.923102  | -0.032890 |
| C | -1.599479 | -0.095959 | -0.008830 |
| F | -1.529678 | 0.589442  | 1.122669  |
| F | -1.353475 | -1.368017 | 0.254568  |
| F | -2.808913 | 0.011401  | -0.513900 |
| F | 1.456386  | -1.392563 | -0.775455 |
| O | 2.787224  | 0.167227  | -0.049836 |
| F | 1.132515  | -0.608677 | 1.223468  |
| H | 2.853567  | 0.971113  | 0.478627  |

Rotational constants (GHz): 1.9671300 0.8517200 0.7523600  
Vibrational harmonic frequencies (cm-1):

|           |           |           |
|-----------|-----------|-----------|
| 56.1864   | 64.2653   | 100.0778  |
| 145.6761  | 195.6141  | 217.2406  |
| 231.8838  | 333.9885  | 355.5384  |
| 430.3594  | 473.7716  | 518.6328  |
| 551.6080  | 588.2199  | 631.7813  |
| 635.5767  | 688.9757  | 756.4629  |
| 817.0888  | 919.8916  | 1076.6466 |
| 1115.4015 | 1195.0133 | 1252.5595 |
| 1279.5839 | 1324.2073 | 1334.9484 |
| 1380.0539 | 1445.4786 | 3851.2739 |

Zero-point correction (Hartree): 0.054603

CF3OCFCFOH

-----

E (CCSD(T)/Aug-CC-pVDZ) (Hartree): -763.03065280  
E (CCSD/Aug-CC-pVDZ) (Hartree): -762.97447156  
T1 diagnostic: 0.014030  
E (MP2/Aug-CC-pVDZ) (Hartree): -762.95275856  
E (MP3/Aug-CC-pVDZ) (Hartree): -762.95492937  
E (RHF/Aug-CC-pVDZ) (Hartree): -761.16788487  
E (CCSD(T)-F12a/AUG-CC-PVDZ) (Hartree): -763.70066848  
E (CCSD(T)-F12b/AUG-CC-PVDZ) (Hartree): -763.64327573  
E (CCSD-F12a/AUG-CC-PVDZ) (Hartree): -763.64634146  
T1 diagnostic: 0.012242  
D1 diagnostic: 0.039870  
E (CCSD-F12b/AUG-CC-PVDZ) (Hartree): -763.58894871  
E (CCSD-T-F12a/AUG-CC-PVDZ) (Hartree): -763.69982780  
E (CCSD-T-F12b/AUG-CC-PVDZ) (Hartree): -763.64243505  
E (CCSD[T]-F12a/AUG-CC-PVDZ) (Hartree): -763.70385615  
E (CCSD[T]-F12b/AUG-CC-PVDZ) (Hartree): -763.64646340  
E (RHF/AUG-CC-PVDZ) (Hartree): -761.16788486  
E (RM062X/Aug-CC-pVTZ) (Hartree): -764.61669024  
Electronic state : 1-A  
Cartesian coordinates (Angs):

|   |           |           |           |
|---|-----------|-----------|-----------|
| C | 1.697303  | -0.314127 | -0.065234 |
| C | 0.696456  | 0.508023  | -0.332742 |
| O | -0.498166 | 0.147337  | -0.860605 |
| F | 0.864571  | 1.827593  | -0.167327 |

|                                          |           |           |           |           |
|------------------------------------------|-----------|-----------|-----------|-----------|
| C                                        | -1.498558 | -0.097117 | 0.042375  |           |
| F                                        | -1.698955 | 0.942592  | 0.843706  |           |
| F                                        | -1.218999 | -1.146717 | 0.803783  |           |
| F                                        | -2.595628 | -0.337827 | -0.641731 |           |
| F                                        | 1.582652  | -1.611350 | -0.229121 |           |
| O                                        | 2.906087  | 0.023870  | 0.381457  |           |
| H                                        | 2.962662  | 0.981061  | 0.483004  |           |
| Rotational constants (GHz):              | 2.3678000 | 0.9378600 | 0.7770100 |           |
| Vibrational harmonic frequencies (cm-1): |           |           |           |           |
| 39.3526                                  |           | 75.9167   |           | 113.6979  |
| 196.8963                                 |           | 210.8595  |           | 333.3735  |
| 343.3296                                 |           | 369.5487  |           | 430.9537  |
| 470.1321                                 |           | 546.0914  |           | 561.8221  |
| 633.2306                                 |           | 642.1482  |           | 653.3715  |
| 718.7025                                 |           | 848.4312  |           | 945.1177  |
| 1141.9258                                |           | 1241.8175 |           | 1261.1224 |
| 1275.7995                                |           | 1340.5050 |           | 1347.0802 |
| 1453.5124                                |           | 1912.3119 |           | 3852.1868 |
| Zero-point correction (Hartree):         | 0.052305  |           |           |           |

CF3OCFCFO

```

-----
E(CCSD(T)/Aug-CC-pVDZ) (Hartree): -762.41668276
E(CCSD/Aug-CC-pVDZ) (Hartree): -762.36085840
  T1 diagnostic: 0.018660
E(MP2/Aug-CC-pVDZ) (Hartree): -762.33613262
E(MP3/Aug-CC-pVDZ) (Hartree): -762.33453882
E(PMP2/Aug-CC-pVDZ) (Hartree): -762.34370037
E(PMP3/Aug-CC-pVDZ) (Hartree): -762.33949247
E(PUHF/Aug-CC-pVDZ) (Hartree): -760.59888672
E(UHF/Aug-CC-pVDZ) (Hartree): -760.58936602
E(RHF-RMP2/AUG-CC-PVDZ) (Hartree): -762.43563794
  T1 diagnostic: 0.000371
E(RHF-UCCSD(T)-F12a/AUG-CC-PVDZ) (Hartree): -763.08010394
E(RHF-UCCSD(T)-F12b/AUG-CC-PVDZ) (Hartree): -763.02364568
E(RHF-UCCSD-F12a/AUG-CC-PVDZ) (Hartree): -763.02552988
  T1 diagnostic: 0.015132
  D1 diagnostic: 0.062102
E(RHF-UCCSD-F12b/AUG-CC-PVDZ) (Hartree): -762.96907162
E(RHF-UCCSD-T-F12a/AUG-CC-PVDZ) (Hartree): -763.07905991
E(RHF-UCCSD-T-F12b/AUG-CC-PVDZ) (Hartree): -763.02260164
E(RHF-UCCSD[T]-F12a/AUG-CC-PVDZ) (Hartree): -763.08425775
E(RHF-UCCSD[T]-F12b/AUG-CC-PVDZ) (Hartree): -763.02779948
E(ROHF/AUG-CC-PVDZ) (Hartree): -760.58090571
E(UM062X/Aug-CC-pVTZ) (Hartree): -763.99861019

```

Electronic state : 2-A

Cartesian coordinates (Angs):

|                                          |           |           |           |           |
|------------------------------------------|-----------|-----------|-----------|-----------|
| C                                        | 1.873488  | -0.283003 | -0.005999 |           |
| C                                        | 0.732139  | 0.553543  | -0.268754 |           |
| O                                        | -0.410369 | 0.124131  | -0.815363 |           |
| F                                        | 0.856461  | 1.843711  | -0.142807 |           |
| C                                        | -1.471029 | -0.111747 | 0.038604  |           |
| F                                        | -1.800357 | 0.988057  | 0.697154  |           |
| F                                        | -1.163206 | -1.046276 | 0.922696  |           |
| F                                        | -2.479154 | -0.508567 | -0.697243 |           |
| F                                        | 1.582952  | -1.570207 | -0.221660 |           |
| O                                        | 2.938138  | 0.086718  | 0.364567  |           |
| Rotational constants (GHz):              | 2.4015400 | 0.9527600 | 0.7876000 |           |
| Vibrational harmonic frequencies (cm-1): |           |           |           |           |
| 30.8096                                  |           | 54.9156   |           | 79.5883   |
| 148.8373                                 |           | 212.8933  |           | 327.6208  |
| 357.1783                                 |           | 380.5919  |           | 465.8821  |
| 530.7936                                 |           | 567.1727  |           | 638.9214  |
| 665.2909                                 |           | 669.9304  |           | 703.4067  |
| 832.0471                                 |           | 943.3547  |           | 1149.2375 |
| 1208.2625                                |           | 1280.0836 |           | 1354.9931 |
| 1409.3401                                |           | 1503.0235 |           | 1845.4521 |
| Zero-point correction (Hartree):         | 0.039548  |           |           |           |

CF3OCFOCF2OH

E (CCSD(T)/Aug-CC-pVDZ) (Hartree): -937.74545787  
E (CCSD/Aug-CC-pVDZ) (Hartree): -937.67914431  
T1 diagnostic: 0.017289  
E (MP2/Aug-CC-pVDZ) (Hartree): -937.64401159  
E (MP3/Aug-CC-pVDZ) (Hartree): -937.65164978  
E (PMP2/Aug-CC-pVDZ) (Hartree): -937.64616276  
E (PMP3/Aug-CC-pVDZ) (Hartree): -937.65300845  
E (PUHF/Aug-CC-pVDZ) (Hartree): -935.50218141  
E (UHF/Aug-CC-pVDZ) (Hartree): -935.49864713  
E (UM062X/Aug-CC-pVTZ) (Hartree): -939.67178872  
Electronic state : 2-A  
Cartesian coordinates (Angs):  
C 1.380403 -0.521443 -0.023440  
C 0.565405 0.857434 -0.000780  
O -0.721756 0.778985 -0.534941  
F 1.203447 1.683136 -0.848147  
C -1.680708 -0.058606 -0.042483  
F -1.699462 -0.104059 1.281207  
F -1.527345 -1.295254 -0.497423  
F -2.840391 0.401564 -0.471954  
F 1.241341 -1.033102 -1.236549  
O 2.689990 -0.343433 0.214143  
F 0.811390 -1.355972 0.863406  
H 2.823771 0.113820 1.053303  
O 0.642367 1.258830 1.262304  
Rotational constants (GHz): 1.5690500 0.7777300 0.7075900  
Vibrational harmonic frequencies (cm-1):  
41.5964 65.2281 117.6917  
158.8565 197.5291 220.4649  
248.5576 317.1541 337.4952  
349.6156 373.1564 432.1009  
467.0354 521.1334 536.1744  
585.5829 625.3223 668.9336  
692.3582 731.0070 778.8964  
867.7167 974.3913 1091.4635  
1149.4329 1203.4483 1255.8633  
1272.0385 1277.2491 1300.5400  
1342.0130 1413.1134 3840.4384  
Zero-point correction (Hartree): 0.057988

CF3OCFOCFO

-----  
E (CCSD(T)/Aug-CC-pVDZ) (Hartree): -837.47280392  
E (CCSD/Aug-CC-pVDZ) (Hartree): -837.41044764  
T1 diagnostic: 0.016370  
E (MP2/Aug-CC-pVDZ) (Hartree): -837.38394495  
E (MP3/Aug-CC-pVDZ) (Hartree): -837.38469304  
E (PMP2/Aug-CC-pVDZ) (Hartree): -837.38594288  
E (PMP3/Aug-CC-pVDZ) (Hartree): -837.38592337  
E (PUHF/Aug-CC-pVDZ) (Hartree): -835.46096970  
E (UHF/Aug-CC-pVDZ) (Hartree): -835.45766747  
E (UM062X/Aug-CC-pVTZ) (Hartree): -839.20080563  
Electronic state : 2-A  
Cartesian coordinates (Angs):  
C 1.555107 -0.553596 0.169987  
C 0.720907 0.725950 -0.137611  
O -0.504024 0.459298 -0.754731  
F 1.405239 1.422662 -1.063895  
C -1.483177 -0.139469 -0.013081  
F -2.090763 0.717269 0.789941  
F -0.985749 -1.126159 0.734756  
F -2.363411 -0.636134 -0.852945  
F 1.519219 -1.354387 -0.881463  
O 2.157596 -0.771354 1.148906  
O 0.581698 1.386236 1.024160  
Rotational constants (GHz): 1.7520800 0.9117100 0.8377000  
Vibrational harmonic frequencies (cm-1):  
48.7130 56.8937 87.6194  
161.1413 214.2614 231.8856  
327.8106 357.1793 375.8044  
435.9079 486.7333 516.3118

|           |           |           |
|-----------|-----------|-----------|
| 621.8567  | 643.5234  | 679.5603  |
| 716.0841  | 791.8045  | 817.8198  |
| 940.6982  | 1073.4457 | 1169.4076 |
| 1200.0343 | 1262.6999 | 1276.5884 |
| 1285.8286 | 1351.7603 | 1977.0995 |

Zero-point correction (Hartree): 0.043532

CF3OCFOHCF2

-----

E(CCSD(T)/Aug-CC-pVDZ) (Hartree): -862.67823901  
E(CCSD/Aug-CC-pVDZ) (Hartree): -862.61849154  
T1 diagnostic: 0.015042  
E(MP2/Aug-CC-pVDZ) (Hartree): -862.59266732  
E(MP3/Aug-CC-pVDZ) (Hartree): -862.59369205  
E(PMP2/Aug-CC-pVDZ) (Hartree): -862.59389342  
E(PMP3/Aug-CC-pVDZ) (Hartree): -862.59443402  
E(PUHF/Aug-CC-pVDZ) (Hartree): -860.62203596  
E(UHF/Aug-CC-pVDZ) (Hartree): -860.61996547  
E(UM062X/Aug-CC-pVTZ) (Hartree): -864.45173426  
Electronic state : 2-A  
Cartesian coordinates (Angs):

|   |           |           |           |
|---|-----------|-----------|-----------|
| C | -1.489195 | 0.654573  | 0.099178  |
| C | -0.883855 | -0.731683 | -0.002240 |
| O | 0.415719  | -0.800292 | -0.558508 |
| F | -0.816477 | -1.234597 | 1.254094  |
| C | 1.417062  | 0.008786  | -0.116461 |
| F | 1.555906  | -0.016787 | 1.201120  |
| F | 1.216253  | 1.272691  | -0.480181 |
| F | 2.533853  | -0.416748 | -0.674872 |
| F | -1.564058 | 1.306421  | -1.037024 |
| F | -1.022788 | 1.406063  | 1.070653  |
| O | -1.686380 | -1.470557 | -0.795468 |
| H | -1.222976 | -2.276653 | -1.055168 |

Rotational constants (GHz): 1.5627000 0.9837300 0.8717900  
Vibrational harmonic frequencies (cm-1):

|           |           |           |
|-----------|-----------|-----------|
| 56.5679   | 85.7806   | 130.8114  |
| 157.6260  | 206.2864  | 223.6211  |
| 296.7746  | 350.1205  | 367.4183  |
| 400.5865  | 449.6121  | 503.7303  |
| 552.3728  | 582.8158  | 612.7878  |
| 659.3554  | 682.7016  | 751.8294  |
| 822.5844  | 930.1136  | 1073.3260 |
| 1123.2349 | 1239.6282 | 1270.2941 |
| 1275.8182 | 1327.0924 | 1334.4584 |
| 1349.5862 | 1490.0589 | 3828.4442 |

Zero-point correction (Hartree): 0.054985

CF3OCOHC2F2

-----

E(CCSD(T)/Aug-CC-pVDZ) (Hartree): -763.02985823  
E(CCSD/Aug-CC-pVDZ) (Hartree): -762.97351005  
T1 diagnostic: 0.013960  
E(MP2/Aug-CC-pVDZ) (Hartree): -762.95168113  
E(MP3/Aug-CC-pVDZ) (Hartree): -762.95394099  
E(RHF/Aug-CC-pVDZ) (Hartree): -761.16563384  
E(CCSD(T)-F12a/AUG-CC-PVDZ) (Hartree): -763.69972079  
E(CCSD(T)-F12b/AUG-CC-PVDZ) (Hartree): -763.64233447  
E(CCSD-F12a/AUG-CC-PVDZ) (Hartree): -763.64523972  
T1 diagnostic: 0.012156  
D1 diagnostic: 0.035790  
E(CCSD-F12b/AUG-CC-PVDZ) (Hartree): -763.58785340  
E(CCSD-T-F12a/AUG-CC-PVDZ) (Hartree): -763.69887598  
E(CCSD-T-F12b/AUG-CC-PVDZ) (Hartree): -763.64148966  
E(CCSD[T]-F12a/AUG-CC-PVDZ) (Hartree): -763.70287446  
E(CCSD[T]-F12b/AUG-CC-PVDZ) (Hartree): -763.64548814  
E(RHF/AUG-CC-PVDZ) (Hartree): -761.16563383  
E(RM062X/Aug-CC-pVTZ) (Hartree): -764.61538532  
Electronic state : 1-A  
Cartesian coordinates (Angs):

|   |          |           |           |
|---|----------|-----------|-----------|
| C | 1.678096 | -0.291577 | -0.055468 |
| C | 0.710327 | 0.567035  | -0.323176 |



|                                          |           |           |           |  |
|------------------------------------------|-----------|-----------|-----------|--|
| O                                        | -0.473649 | 0.100157  | -0.866355 |  |
| C                                        | -1.465067 | -0.130761 | 0.028176  |  |
| F                                        | -1.678083 | 0.942631  | 0.807627  |  |
| F                                        | -1.188354 | -1.146419 | 0.836749  |  |
| F                                        | -2.568124 | -0.396081 | -0.635380 |  |
| F                                        | 2.850439  | 0.057041  | 0.409667  |  |
| F                                        | 1.589966  | -1.582927 | -0.254277 |  |
| O                                        | 0.869225  | 1.899256  | -0.231098 |  |
| H                                        | 0.242670  | 2.268319  | 0.402951  |  |
| Rotational constants (GHz):              | 2.3772400 | 0.9333700 | 0.7776800 |  |
| Vibrational harmonic frequencies (cm-1): |           |           |           |  |
| 47.4401                                  | 76.4699   |           | 127.1506  |  |
| 204.4254                                 | 216.0984  |           | 297.9877  |  |
| 355.5515                                 | 370.6517  |           | 444.6534  |  |
| 479.0097                                 | 541.0661  |           | 562.9832  |  |
| 625.1109                                 | 646.9510  |           | 653.3066  |  |
| 720.3848                                 | 844.9401  |           | 939.5104  |  |
| 1171.1641                                | 1212.0809 |           | 1262.7407 |  |
| 1294.9651                                | 1346.2558 |           | 1350.8466 |  |
| 1391.3225                                | 1919.8654 |           | 3817.5206 |  |
| Zero-point correction (Hartree):         | 0.052217  |           |           |  |

complex.CF3OCFCF2.OH.a

```

-----
E(CCSD(T)/Aug-CC-pVDZ) (Hartree): -862.59807137
E(CCSD/Aug-CC-pVDZ) (Hartree): -862.53797614
  T1 diagnostic: 0.016079
E(MP2/Aug-CC-pVDZ) (Hartree): -862.50298195
E(MP3/Aug-CC-pVDZ) (Hartree): -862.51390028
E(PMP2/Aug-CC-pVDZ) (Hartree): -862.50576865
E(PMP3/Aug-CC-pVDZ) (Hartree): -862.51582359
E(PUHF/Aug-CC-pVDZ) (Hartree): -860.55092244
E(UHF/Aug-CC-pVDZ) (Hartree): -860.54721272
E(UM062X/Aug-CC-pVTZ) (Hartree): -864.36843635
Electronic state : 2-A
Cartesian coordinates (Angs):
  C    1.418486    0.500640   -0.330002
  C    0.517285   -0.464442   -0.227240
  O   -0.541192   -0.389634    0.618146
  F    0.637440   -1.600055   -0.883083
  C   -1.717468    0.068731    0.075703
  F   -2.083036   -0.655524   -0.971429
  F   -1.602458    1.329406   -0.318686
  F   -2.635448   -0.013519    1.011633
  F    1.324506    1.637659    0.304185
  F    2.478816    0.415204   -1.078209
  H    1.606075   -0.612321    2.277499
  O    2.291909   -0.864840    1.635857
Rotational constants (GHz):  1.6907800    0.7131500    0.6825900
Vibrational harmonic frequencies (cm-1):
  34.2782          45.7880          63.8957
  78.2298          121.4535          135.6739
  164.3050         200.6411          216.1293
  344.2503         368.2670          453.0312
  464.7562         473.9792          544.9255
  558.4325         602.9293          644.2961
  652.0892         725.0745          848.4207
  946.5575         1221.9930         1237.9249
  1272.8852        1344.6454         1371.4613
  1417.4671        1893.5131         3758.5733
Zero-point correction (Hartree): 0.050589

```

complex.CF3OCFCF2.OH.b

```

-----
E(CCSD(T)/Aug-CC-pVDZ) (Hartree): -862.59820785
E(CCSD/Aug-CC-pVDZ) (Hartree): -862.53817586
  T1 diagnostic: 0.015977
E(MP2/Aug-CC-pVDZ) (Hartree): -862.50282845
E(MP3/Aug-CC-pVDZ) (Hartree): -862.51411269
E(PMP2/Aug-CC-pVDZ) (Hartree): -862.50592076
E(PMP3/Aug-CC-pVDZ) (Hartree): -862.51628754

```

E(PUHF/Aug-CC-pVDZ) (Hartree): -860.55195866  
E(UHF/Aug-CC-pVDZ) (Hartree): -860.54803000  
E(UM062X/Aug-CC-pVTZ) (Hartree): -864.36919563  
Electronic state : 2-A  
Cartesian coordinates (Angs):

|   |           |           |           |
|---|-----------|-----------|-----------|
| C | 1.586220  | -0.171660 | -0.488051 |
| C | 0.565543  | 0.670581  | -0.459746 |
| O | -0.655646 | 0.365890  | -0.966548 |
| F | 0.701298  | 1.910311  | -0.033530 |
| C | -1.596676 | -0.082121 | -0.081446 |
| F | -1.739527 | 0.735201  | 0.949257  |
| F | -1.267410 | -1.284038 | 0.399233  |
| F | -2.733310 | -0.182973 | -0.729610 |
| F | 1.486623  | -1.400739 | -0.920015 |
| F | 2.793714  | 0.149499  | -0.127497 |
| H | 0.313624  | -1.090926 | 2.008692  |
| O | 1.053567  | -0.460292 | 2.007326  |

Rotational constants (GHz): 1.6995100 0.7728000 0.7418400  
Vibrational harmonic frequencies (cm-1):

|           |           |           |
|-----------|-----------|-----------|
| 48.0406   | 53.7971   | 75.4763   |
| 105.9341  | 124.4629  | 141.9200  |
| 195.7721  | 211.7467  | 218.5406  |
| 344.4485  | 368.4928  | 411.6841  |
| 446.6154  | 472.3467  | 545.1325  |
| 558.7250  | 604.8006  | 643.6548  |
| 651.1163  | 722.6584  | 848.4529  |
| 945.5485  | 1220.0265 | 1235.1844 |
| 1262.6165 | 1347.5944 | 1368.8487 |
| 1414.4823 | 1899.8467 | 3769.7304 |

Zero-point correction (Hartree): 0.050707

CF2OCFCF2oxide

-----  
E(CCS(D)/Aug-CC-pVDZ) (Hartree): -762.34736815  
E(CCS(D)/Aug-CC-pVDZ) (Hartree): -762.29155883  
T1 diagnostic: 0.015476  
E(MP2/Aug-CC-pVDZ) (Hartree): -762.27324443  
E(MP3/Aug-CC-pVDZ) (Hartree): -762.26916913  
E(PMP2/Aug-CC-pVDZ) (Hartree): -762.27414350  
E(PMP3/Aug-CC-pVDZ) (Hartree): -762.26971430  
E(PUHF/Aug-CC-pVDZ) (Hartree): -760.51813262  
E(UHF/Aug-CC-pVDZ) (Hartree): -760.51652241  
E(RHF-RMP2/AUG-CC-PVDZ) (Hartree): -762.36705355  
T1 diagnostic: 0.000342  
E(RHF-UCCSD(T)-F12a/AUG-CC-PVDZ) (Hartree): -763.01222617  
E(RHF-UCCSD(T)-F12b/AUG-CC-PVDZ) (Hartree): -762.95573571  
E(RHF-UCCSD-F12a/AUG-CC-PVDZ) (Hartree): -762.95816991  
T1 diagnostic: 0.013927  
D1 diagnostic: 0.051838  
E(RHF-UCCSD-F12b/AUG-CC-PVDZ) (Hartree): -762.90167945  
E(RHF-UCCSD-T-F12a/AUG-CC-PVDZ) (Hartree): -763.01121960  
E(RHF-UCCSD-T-F12b/AUG-CC-PVDZ) (Hartree): -762.95472914  
E(RHF-UCCSD[T]-F12a/AUG-CC-PVDZ) (Hartree): -763.01597650  
E(RHF-UCCSD[T]-F12b/AUG-CC-PVDZ) (Hartree): -762.95948604  
E(ROHF/AUG-CC-PVDZ) (Hartree): -760.51420455  
E(UM062X/Aug-CC-pVTZ) (Hartree): -763.93270461  
Electronic state : 2-A  
Cartesian coordinates (Angs):

|   |           |           |           |
|---|-----------|-----------|-----------|
| C | 1.665535  | -0.235154 | -0.001502 |
| C | 0.355397  | 0.375006  | -0.062484 |
| O | -0.721466 | -0.316469 | -0.520953 |
| F | 0.211460  | 1.688877  | -0.179776 |
| C | -1.865512 | -0.170195 | 0.208155  |
| F | -2.557483 | 0.904881  | -0.110769 |
| F | -2.602517 | -1.245800 | 0.102795  |
| F | 1.890295  | -1.485551 | -0.349794 |
| O | 0.928535  | -0.039089 | 1.148952  |
| F | 2.770572  | 0.473874  | -0.116791 |

Rotational constants (GHz): 2.8170800 0.8481800 0.7059000  
Vibrational harmonic frequencies (cm-1):

|         |         |          |
|---------|---------|----------|
| 23.4862 | 54.7258 | 120.8768 |
|---------|---------|----------|

|           |           |           |
|-----------|-----------|-----------|
| 189.3076  | 247.9181  | 291.8713  |
| 399.6678  | 464.2976  | 524.7385  |
| 557.1793  | 580.4822  | 591.7129  |
| 676.9716  | 754.6718  | 818.6343  |
| 889.2836  | 1073.3178 | 1168.9634 |
| 1223.0893 | 1243.9420 | 1310.3014 |
| 1330.9024 | 1335.4954 | 1659.4276 |

Zero-point correction (Hartree): 0.039939

CF3OCCF2oxide

-----

E(CCSD(T)/Aug-CC-pVDZ) (Hartree): -762.35692294  
E(CCSD/Aug-CC-pVDZ) (Hartree): -762.30086983  
T1 diagnostic: 0.016113  
E(MP2/Aug-CC-pVDZ) (Hartree): -762.28211803  
E(MP3/Aug-CC-pVDZ) (Hartree): -762.27828136  
E(PMP2/Aug-CC-pVDZ) (Hartree): -762.28366849  
E(PMP3/Aug-CC-pVDZ) (Hartree): -762.27925679  
E(PUHF/Aug-CC-pVDZ) (Hartree): -760.52736845  
E(UHF/Aug-CC-pVDZ) (Hartree): -760.52492002  
E(RHF-RMP2/AUG-CC-PVDZ) (Hartree): -762.37617071  
T1 diagnostic: 0.000424  
E(RHF-UCCSD(T)-F12a/AUG-CC-PVDZ) (Hartree): -763.02262505  
E(RHF-UCCSD(T)-F12b/AUG-CC-PVDZ) (Hartree): -762.96612639  
E(RHF-UCCSD-F12a/AUG-CC-PVDZ) (Hartree): -762.96833382  
T1 diagnostic: 0.015178  
D1 diagnostic: 0.070706  
E(RHF-UCCSD-F12b/AUG-CC-PVDZ) (Hartree): -762.91183515  
E(RHF-UCCSD-T-F12a/AUG-CC-PVDZ) (Hartree): -763.02160517  
E(RHF-UCCSD-T-F12b/AUG-CC-PVDZ) (Hartree): -762.96510650  
E(RHF-UCCSD[T]-F12a/AUG-CC-PVDZ) (Hartree): -763.02651683  
E(RHF-UCCSD[T]-F12b/AUG-CC-PVDZ) (Hartree): -762.97001817  
E(ROHF/AUG-CC-PVDZ) (Hartree): -760.52154358  
E(UM062X/Aug-CC-pVTZ) (Hartree): -763.94181699  
Electronic state : 2-A  
Cartesian coordinates (Angs):

|   |           |           |           |
|---|-----------|-----------|-----------|
| C | -1.929430 | 0.011476  | -0.068472 |
| C | -0.548650 | -0.339502 | -0.197303 |
| O | 0.479595  | 0.522828  | -0.370075 |
| C | 1.723486  | 0.031340  | -0.061111 |
| F | 2.052733  | -0.972269 | -0.861393 |
| F | 2.581219  | 1.013707  | -0.218257 |
| F | -2.352541 | 1.257836  | 0.024335  |
| O | -1.201452 | -0.452380 | 1.023170  |
| F | -2.909313 | -0.758319 | -0.495813 |
| F | 1.772616  | -0.405785 | 1.188523  |

Rotational constants (GHz): 3.2260600 0.7128200 0.6888800  
Vibrational harmonic frequencies (cm-1):

|           |           |           |
|-----------|-----------|-----------|
| 29.5396   | 59.8188   | 110.7674  |
| 205.4997  | 262.9486  | 360.7505  |
| 440.7598  | 500.5218  | 527.3636  |
| 542.8031  | 622.4714  | 631.4558  |
| 673.4118  | 733.0941  | 805.9305  |
| 921.0847  | 957.7983  | 1170.2819 |
| 1211.1854 | 1265.9956 | 1276.5725 |
| 1309.1788 | 1346.3577 | 1630.7166 |

Zero-point correction (Hartree): 0.040087

CF3OCOFC2OH

-----

E(CCSD(T)/Aug-CC-pVDZ) (Hartree): -838.16777797  
E(CCSD/Aug-CC-pVDZ) (Hartree): -838.10449444  
T1 diagnostic: 0.014858  
E(MP2/Aug-CC-pVDZ) (Hartree): -838.08658535  
E(MP3/Aug-CC-pVDZ) (Hartree): -838.08037577  
E(RHF/Aug-CC-pVDZ) (Hartree): -836.10817264  
E(RM062X/Aug-CC-pVTZ) (Hartree): -839.90423913  
Electronic state : 1-A  
Cartesian coordinates (Angs):

|   |           |           |           |
|---|-----------|-----------|-----------|
| C | -1.854856 | -0.159767 | -0.000011 |
| C | -0.438818 | 0.455911  | 0.000000  |

|                                          |           |           |           |  |
|------------------------------------------|-----------|-----------|-----------|--|
| O                                        | 0.500736  | -0.509017 | 0.000034  |  |
| C                                        | 1.831717  | -0.128909 | 0.000000  |  |
| F                                        | 2.125130  | 0.576524  | 1.075987  |  |
| F                                        | 2.125026  | 0.576573  | -1.075978 |  |
| F                                        | 2.538438  | -1.237262 | -0.000079 |  |
| F                                        | -1.977278 | -0.955777 | 1.077806  |  |
| O                                        | -2.796308 | 0.792654  | -0.000322 |  |
| F                                        | -1.977171 | -0.956220 | -1.077485 |  |
| H                                        | -2.374405 | 1.663323  | 0.000029  |  |
| O                                        | -0.249572 | 1.628704  | 0.000010  |  |
| Rotational constants (GHz):              | 2.2283300 | 0.6736300 | 0.6310900 |  |
| Vibrational harmonic frequencies (cm-1): |           |           |           |  |
| 32.8480                                  | 61.5489   |           | 110.0044  |  |
| 134.2569                                 | 219.0461  |           | 226.7349  |  |
| 343.4511                                 | 353.8895  |           | 390.5974  |  |
| 443.1185                                 | 445.6198  |           | 535.5075  |  |
| 566.9201                                 | 593.4068  |           | 630.0337  |  |
| 678.5275                                 | 767.6590  |           | 794.5522  |  |
| 906.4158                                 | 932.3305  |           | 1117.0631 |  |
| 1186.4887                                | 1205.3410 |           | 1275.5785 |  |
| 1303.3657                                | 1337.7853 |           | 1349.8449 |  |
| 1463.0118                                | 1915.2829 |           | 3788.5830 |  |
| Zero-point correction (Hartree):         | 0.057202  |           |           |  |

CFOHCF2

```

-----
E(CCSD(T)/Aug-CC-pVDZ) (Hartree): -450.60736301
E(CCSD/Aug-CC-pVDZ) (Hartree): -450.57401707
  T1 diagnostic: 0.014209
E(MP2/Aug-CC-pVDZ) (Hartree): -450.55676005
E(MP3/Aug-CC-pVDZ) (Hartree): -450.56202051
E(RHF/Aug-CC-pVDZ) (Hartree): -449.49611634
E(CCSD(T)-F12a/AUG-CC-PVDZ) (Hartree): -451.00406231
E(CCSD(T)-F12b/AUG-CC-PVDZ) (Hartree): -450.96988970
E(CCSD-F12a/AUG-CC-PVDZ) (Hartree): -450.97185401
  T1 diagnostic: 0.012657
  D1 diagnostic: 0.036188
E(CCSD-F12b/AUG-CC-PVDZ) (Hartree): -450.93768139
E(CCSD-T-F12a/AUG-CC-PVDZ) (Hartree): -451.00362064
E(CCSD-T-F12b/AUG-CC-PVDZ) (Hartree): -450.96944803
E(CCSD[T]-F12a/AUG-CC-PVDZ) (Hartree): -451.00594509
E(CCSD[T]-F12b/AUG-CC-PVDZ) (Hartree): -450.97177247
E(RHF/AUG-CC-PVDZ) (Hartree): -449.49611633
E(RM062X/Aug-CC-pVTZ) (Hartree): -451.54768494
Electronic state : 1-A
Cartesian coordinates (Angs):
  C    0.656130    0.013701   -0.006502
  C   -0.661490   -0.030323    0.009164
  O    1.446122   -1.060012   -0.107734
  F    1.280076    1.192610    0.007123
  F   -1.429429    1.035357   -0.004390
  F   -1.353870   -1.146394    0.015487
  H    1.992182   -1.154327    0.681922
Rotational constants (GHz):    5.4919500    3.2940600    2.0698000
Vibrational harmonic frequencies (cm-1):
  194.0972    216.8521    264.6386
  400.8565    431.6542    564.5436
  571.4981    602.0626    820.2360
  1172.3342    1287.8268    1362.9885
  1380.5251    1948.8876    3814.8780
Zero-point correction (Hartree): 0.034250

```

CFOCFOH

```

-----
E(CCSD(T)/Aug-CC-pVDZ) (Hartree): -426.02904005
E(CCSD/Aug-CC-pVDZ) (Hartree): -425.99420552
  T1 diagnostic: 0.020264
E(MP2/Aug-CC-pVDZ) (Hartree): -425.97529967
E(MP3/Aug-CC-pVDZ) (Hartree): -425.97757400
E(PMP2/Aug-CC-pVDZ) (Hartree): -425.98123547
E(PMP3/Aug-CC-pVDZ) (Hartree): -425.98126355

```

E(PUHF/Aug-CC-pVDZ) (Hartree): -424.95311725  
 E(UHF/Aug-CC-pVDZ) (Hartree): -424.94538756  
 E(RHF-RMP2/AUG-CC-PVDZ) (Hartree): -426.03132137  
   T1 diagnostic: 0.000396  
 E(RHF-UCCSD(T)-F12a/AUG-CC-PVDZ) (Hartree): -426.40556281  
 E(RHF-UCCSD(T)-F12b/AUG-CC-PVDZ) (Hartree): -426.37222904  
 E(RHF-UCCSD-F12a/AUG-CC-PVDZ) (Hartree): -426.37143085  
   T1 diagnostic: 0.017109  
   D1 diagnostic: 0.064312  
 E(RHF-UCCSD-F12b/AUG-CC-PVDZ) (Hartree): -426.33809709  
 E(RHF-UCCSD-T-F12a/AUG-CC-PVDZ) (Hartree): -426.40494249  
 E(RHF-UCCSD-T-F12b/AUG-CC-PVDZ) (Hartree): -426.37160872  
 E(RHF-UCCSD[T]-F12a/AUG-CC-PVDZ) (Hartree): -426.40829172  
 E(RHF-UCCSD[T]-F12b/AUG-CC-PVDZ) (Hartree): -426.37495795  
 E(ROHF/AUG-CC-PVDZ) (Hartree): -424.93771413  
 E(UM062X/Aug-CC-pVTZ) (Hartree): -426.93307043  
 Electronic state : 2-A  
 Cartesian coordinates (Angs):  
   C 0.754553 0.128359 0.000367  
   C -0.651790 -0.033475 0.000070  
   F 1.430825 -1.023298 -0.000033  
   O 1.293598 1.205334 -0.000041  
   F -1.240602 -1.195519 -0.000078  
   O -1.468606 0.994490 -0.000164  
   H -0.928519 1.801454 0.000004  
 Rotational constants (GHz): 5.6555000 3.5529700 2.1821000  
 Vibrational harmonic frequencies (cm-1):  
   157.5606 225.7205 328.2947  
   408.4199 535.6237 557.3604  
   612.8479 653.8507 841.1988  
   1148.6338 1250.4243 1508.4537  
   1610.2012 1790.5511 3755.1269  
 Zero-point correction (Hartree): 0.035048

CFOCF2O

-----  
 E(CCSD(T)/Aug-CC-pVDZ) (Hartree): -525.05836483  
 E(CCSD/Aug-CC-pVDZ) (Hartree): -525.01929689  
   T1 diagnostic: 0.017057  
 E(MP2/Aug-CC-pVDZ) (Hartree): -524.99814725  
 E(MP3/Aug-CC-pVDZ) (Hartree): -525.00159692  
 E(PMP2/Aug-CC-pVDZ) (Hartree): -525.00012655  
 E(PMP3/Aug-CC-pVDZ) (Hartree): -525.00281169  
 E(PUHF/Aug-CC-pVDZ) (Hartree): -523.80160897  
 E(UHF/Aug-CC-pVDZ) (Hartree): -523.79834834  
 E(RHF-RMP2/AUG-CC-PVDZ) (Hartree): -525.05863601  
   T1 diagnostic: 0.000285  
 E(RHF-UCCSD(T)-F12a/AUG-CC-PVDZ) (Hartree): -525.51096034  
 E(RHF-UCCSD(T)-F12b/AUG-CC-PVDZ) (Hartree): -525.47167219  
 E(RHF-UCCSD-F12a/AUG-CC-PVDZ) (Hartree): -525.47318757  
   T1 diagnostic: 0.015868  
   D1 diagnostic: 0.051619  
 E(RHF-UCCSD-F12b/AUG-CC-PVDZ) (Hartree): -525.43389942  
 E(RHF-UCCSD-T-F12a/AUG-CC-PVDZ) (Hartree): -525.51016783  
 E(RHF-UCCSD-T-F12b/AUG-CC-PVDZ) (Hartree): -525.47087968  
 E(RHF-UCCSD[T]-F12a/AUG-CC-PVDZ) (Hartree): -525.51399971  
 E(RHF-UCCSD[T]-F12b/AUG-CC-PVDZ) (Hartree): -525.47471156  
 E(ROHF/AUG-CC-PVDZ) (Hartree): -523.79361420  
 E(UM062X/Aug-CC-pVTZ) (Hartree): -526.14217031  
 Point group : CS  
 Electronic state : 2-A'  
 Cartesian coordinates (Angs):  
   C 0.318830 -0.884516 0.000000  
   C -0.047256 0.625293 0.000000  
   F -0.800310 -1.588483 0.000000  
   O 1.393234 -1.348090 0.000000  
   F -0.800310 0.896921 1.077851  
   F -0.800310 0.896921 -1.077851  
   O 1.104130 1.311478 0.000000  
 Rotational constants (GHz): 3.9044600 2.5750200 2.1287000  
 Vibrational harmonic frequencies (cm-1):

|                 |                 |                 |
|-----------------|-----------------|-----------------|
| 43.6510 ( A")   | 223.1176 ( A')  | 227.8454 ( A")  |
| 376.3144 ( A')  | 412.0765 ( A')  | 471.7187 ( A")  |
| 591.1972 ( A')  | 685.9632 ( A')  | 772.8299 ( A")  |
| 824.5014 ( A')  | 1064.9203 ( A') | 1188.8857 ( A") |
| 1229.0920 ( A') | 1309.9565 ( A') | 1979.7835 ( A') |

Zero-point correction (Hartree): 0.025975

OCCF2OH

-----

E(CCSD(T)/Aug-CC-pVDZ) (Hartree): -426.01734478  
E(CCSD/Aug-CC-pVDZ) (Hartree): -425.98232323  
T1 diagnostic: 0.018175  
E(MP2/Aug-CC-pVDZ) (Hartree): -425.96617013  
E(MP3/Aug-CC-pVDZ) (Hartree): -425.96587666  
E(PMP2/Aug-CC-pVDZ) (Hartree): -425.96865245  
E(PMP3/Aug-CC-pVDZ) (Hartree): -425.96733430  
E(PUHF/Aug-CC-pVDZ) (Hartree): -424.93616796  
E(UHF/Aug-CC-pVDZ) (Hartree): -424.93238472  
E(RHF-RMP2/AUG-CC-PVDZ) (Hartree): -426.01665548  
T1 diagnostic: 0.000562  
E(RHF-UCCSD(T)-F12a/AUG-CC-PVDZ) (Hartree): -426.39048335  
E(RHF-UCCSD(T)-F12b/AUG-CC-PVDZ) (Hartree): -426.35695254  
E(RHF-UCCSD-F12a/AUG-CC-PVDZ) (Hartree): -426.35645981  
T1 diagnostic: 0.017714  
D1 diagnostic: 0.066500  
E(RHF-UCCSD-F12b/AUG-CC-PVDZ) (Hartree): -426.32292900  
E(RHF-UCCSD-T-F12a/AUG-CC-PVDZ) (Hartree): -426.38977793  
E(RHF-UCCSD-T-F12b/AUG-CC-PVDZ) (Hartree): -426.35624712  
E(RHF-UCCSD[T]-F12a/AUG-CC-PVDZ) (Hartree): -426.39343365  
E(RHF-UCCSD[T]-F12b/AUG-CC-PVDZ) (Hartree): -426.35990284  
E(ROHF/AUG-CC-PVDZ) (Hartree): -424.92717822  
E(UM062X/Aug-CC-pVTZ) (Hartree): -426.91125170  
Electronic state : 2-A  
Cartesian coordinates (Angs):

|   |           |           |           |
|---|-----------|-----------|-----------|
| C | -1.049838 | -0.584821 | -0.365029 |
| C | 0.372313  | 0.004091  | -0.021205 |
| O | -2.039488 | -0.048544 | -0.059200 |
| F | 1.245081  | -0.355275 | -0.953054 |
| F | 0.729001  | -0.593934 | 1.134673  |
| O | 0.379505  | 1.346198  | 0.078770  |
| H | -0.421722 | 1.646023  | 0.526285  |

Rotational constants (GHz): 5.7013100 3.0374700 2.9896300  
Vibrational harmonic frequencies (cm-1):

|           |           |           |
|-----------|-----------|-----------|
| 84.2093   | 234.1835  | 322.9303  |
| 377.1291  | 422.6526  | 537.6628  |
| 560.6715  | 667.3818  | 799.1284  |
| 1088.4371 | 1156.8923 | 1272.6315 |
| 1401.8200 | 2009.1179 | 3826.4575 |

Zero-point correction (Hartree): 0.033629

TS.CF3OCFCF2OH.CF3+HOFC2CFO

-----

E(CCSD(T)/Aug-CC-pVDZ) (Hartree): -862.64053884  
E(CCSD/Aug-CC-pVDZ) (Hartree): -862.57751906  
T1 diagnostic: 0.021698  
E(MP2/Aug-CC-pVDZ) (Hartree): -862.54113787  
E(MP3/Aug-CC-pVDZ) (Hartree): -862.54154177  
E(PMP2/Aug-CC-pVDZ) (Hartree): -862.55622720  
E(PMP3/Aug-CC-pVDZ) (Hartree): -862.55218426  
E(PUHF/Aug-CC-pVDZ) (Hartree): -860.58615424  
E(UHF/Aug-CC-pVDZ) (Hartree): -860.56834725  
E(ROHF/CC-PVDZ) (Hartree): -860.48484834  
E(UM062X/Aug-CC-pVTZ) (Hartree): -864.41078610  
Electronic state : 2-A  
Cartesian coordinates (Angs):

|   |           |           |           |
|---|-----------|-----------|-----------|
| C | 1.675179  | -0.301957 | -0.020319 |
| C | 0.601874  | 0.679554  | -0.466645 |
| O | -0.427502 | 0.409188  | -1.057597 |
| F | 0.791182  | 1.893652  | 0.066706  |
| C | -1.902316 | -0.114266 | 0.024439  |
| F | -1.567591 | 0.212967  | 1.247567  |

|                                          |           |           |           |  |
|------------------------------------------|-----------|-----------|-----------|--|
| F                                        | -2.066878 | -1.401137 | -0.102985 |  |
| F                                        | -2.937743 | 0.554336  | -0.395947 |  |
| F                                        | 1.712072  | -1.327230 | -0.865208 |  |
| O                                        | 2.913542  | 0.232442  | 0.052739  |  |
| F                                        | 1.288419  | -0.795856 | 1.190007  |  |
| H                                        | 2.888084  | 1.056401  | 0.552753  |  |
| Rotational constants (GHz):              | 1.9154300 | 0.7076500 | 0.6410400 |  |
| Vibrational harmonic frequencies (cm-1): |           |           |           |  |
| i554.3051                                | 17.6969   |           | 29.9469   |  |
| 60.0456                                  | 106.4047  |           | 159.4376  |  |
| 193.3809                                 | 228.9851  |           | 253.3864  |  |
| 303.7389                                 | 398.2146  |           | 441.5904  |  |
| 509.4854                                 | 529.9397  |           | 542.0100  |  |
| 588.3353                                 | 640.8728  |           | 684.9633  |  |
| 720.1813                                 | 821.6012  |           | 1037.7657 |  |
| 1087.9941                                | 1114.6423 |           | 1230.4715 |  |
| 1337.5576                                | 1354.5967 |           | 1363.3952 |  |
| 1415.4877                                | 1566.2214 |           | 3853.5012 |  |
| Zero-point correction (Hartree):         | 0.051468  |           |           |  |

TS.CF3OCFCF2OH.CF3OCFCFOH

-----

E(CCSD(T)/Aug-CC-pVDZ) (Hartree): -862.62089616  
E(CCSD/Aug-CC-pVDZ) (Hartree): -862.55628508  
T1 diagnostic: 0.017062  
E(MP2/Aug-CC-pVDZ) (Hartree): -862.53597953  
E(MP3/Aug-CC-pVDZ) (Hartree): -862.53031313  
E(PMP2/Aug-CC-pVDZ) (Hartree): -862.53927138  
E(PMP3/Aug-CC-pVDZ) (Hartree): -862.53214927  
E(PUHF/Aug-CC-pVDZ) (Hartree): -860.54326571  
E(UHF/Aug-CC-pVDZ) (Hartree): -860.53815295  
E(UM062X/Aug-CC-pVTZ) (Hartree): -864.39472005  
Electronic state : 2-A  
Cartesian coordinates (Angs):

|                             |           |           |           |
|-----------------------------|-----------|-----------|-----------|
| C                           | 1.711898  | -0.336597 | -0.266718 |
| C                           | 0.594830  | 0.423750  | -0.531622 |
| O                           | -0.564049 | -0.101718 | -0.902386 |
| F                           | 0.693846  | 1.724209  | -0.560208 |
| C                           | -1.638371 | -0.119125 | -0.010078 |
| F                           | -1.747004 | 1.022736  | 0.632788  |
| F                           | -1.519375 | -1.107347 | 0.844149  |
| F                           | -2.710604 | -0.313017 | -0.750733 |
| F                           | 1.645994  | -1.620026 | -0.414891 |
| O                           | 2.891437  | 0.135433  | 0.017250  |
| F                           | 0.813663  | 0.192743  | 1.497945  |
| H                           | 2.782080  | 0.828425  | 0.690152  |
| Rotational constants (GHz): | 1.9562300 | 0.7969100 | 0.7328400 |

Vibrational harmonic frequencies (cm-1):

|                                  |           |           |
|----------------------------------|-----------|-----------|
| i288.5897                        | 39.9094   | 71.1590   |
| 122.4052                         | 141.5482  | 198.9146  |
| 220.6904                         | 293.9334  | 310.8448  |
| 352.1449                         | 374.8366  | 453.0971  |
| 468.9650                         | 534.7445  | 558.8619  |
| 576.5838                         | 635.7790  | 656.6258  |
| 719.1082                         | 845.1584  | 949.7707  |
| 1175.1196                        | 1178.4222 | 1277.9653 |
| 1322.9519                        | 1331.8935 | 1430.5431 |
| 1516.0337                        | 1744.2349 | 3734.9404 |
| Zero-point correction (Hartree): | 0.052938  |           |

TS.CF3OCFCF2OH.CF3OCFCF2+OH

-----

E(CCSD(T)/Aug-CC-pVDZ) (Hartree): -862.59765570  
E(CCSD/Aug-CC-pVDZ) (Hartree): -862.53604781  
T1 diagnostic: 0.022139  
E(MP2/Aug-CC-pVDZ) (Hartree): -862.49515544  
E(MP3/Aug-CC-pVDZ) (Hartree): -862.50566040  
E(PMP2/Aug-CC-pVDZ) (Hartree): -862.50376341  
E(PMP3/Aug-CC-pVDZ) (Hartree): -862.51202356  
E(PUHF/Aug-CC-pVDZ) (Hartree): -860.54923808  
E(UHF/Aug-CC-pVDZ) (Hartree): -860.53923177

E(UM062X/Aug-CC-pVTZ) (Hartree): -864.36729051  
 Electronic state : 2-A  
 Cartesian coordinates (Angs):

|   |           |           |           |
|---|-----------|-----------|-----------|
| C | -1.430017 | -0.389354 | -0.342970 |
| C | -0.493943 | 0.520273  | -0.057218 |
| O | 0.577187  | 0.264575  | 0.716942  |
| F | -0.639776 | 1.777369  | -0.433494 |
| C | 1.730628  | -0.086846 | 0.056047  |
| F | 2.087416  | 0.843581  | -0.819237 |
| F | 1.576661  | -1.227432 | -0.602013 |
| F | 2.670646  | -0.225187 | 0.959978  |
| F | -1.320795 | -1.642314 | -0.031017 |
| O | -2.256083 | 0.235902  | 1.631870  |
| F | -2.462013 | -0.123902 | -1.090793 |
| H | -2.618092 | 1.112699  | 1.423514  |

Rotational constants (GHz): 1.8013900 0.7260600 0.6812700  
 Vibrational harmonic frequencies (cm-1):

|           |           |           |
|-----------|-----------|-----------|
| i269.7903 | 35.5640   | 75.2433   |
| 80.9655   | 96.5386   | 143.5073  |
| 193.0727  | 205.3903  | 234.8082  |
| 345.5931  | 368.7527  | 416.3289  |
| 467.0634  | 514.0674  | 558.6978  |
| 559.9480  | 630.7137  | 644.3130  |
| 652.2667  | 720.9117  | 843.0935  |
| 946.2057  | 1223.8594 | 1231.1164 |
| 1269.6484 | 1348.6497 | 1377.9124 |
| 1431.2420 | 1803.7253 | 3772.7118 |

Zero-point correction (Hartree): 0.050557

TS.CF3OCFCF2OH.CF2O+CF2O+CF+HF  
 -----

E(CCSD(T)/Aug-CC-pVDZ) (Hartree): -862.58433156  
 E(CCSD/Aug-CC-pVDZ) (Hartree): -862.51846768  
 T1 diagnostic: 0.018586  
 E(MP2/Aug-CC-pVDZ) (Hartree): -862.49719885  
 E(MP3/Aug-CC-pVDZ) (Hartree): -862.48651034  
 E(PMP2/Aug-CC-pVDZ) (Hartree): -862.50060635  
 E(PMP3/Aug-CC-pVDZ) (Hartree): -862.48867594  
 E(PUHF/Aug-CC-pVDZ) (Hartree): -860.51216120  
 E(UHF/Aug-CC-pVDZ) (Hartree): -860.50737212  
 E(UM062X/Aug-CC-pVTZ) (Hartree): -864.34864816  
 Electronic state : 2-A  
 Cartesian coordinates (Angs):

|   |           |           |           |
|---|-----------|-----------|-----------|
| C | -1.679507 | -0.400523 | -0.016743 |
| C | -1.046212 | 1.204728  | 0.536700  |
| O | 0.889177  | 0.463150  | 1.010832  |
| F | -0.762172 | 1.959309  | -0.416475 |
| C | 1.814145  | 0.335115  | 0.278699  |
| F | 1.857814  | 0.773474  | -0.938003 |
| F | 1.235130  | -1.818077 | -0.644830 |
| F | 2.950707  | -0.161798 | 0.619384  |
| F | -1.642567 | -1.104947 | 1.114722  |
| O | -1.018363 | -0.738867 | -0.988259 |
| F | -2.953887 | 0.008852  | -0.196581 |
| H | 0.337709  | -1.541497 | -0.816473 |

Rotational constants (GHz): 1.6701500 0.7216100 0.6239500  
 Vibrational harmonic frequencies (cm-1):

|           |           |           |
|-----------|-----------|-----------|
| i115.4814 | 32.1340   | 54.5247   |
| 88.8987   | 101.8802  | 131.4933  |
| 158.8324  | 171.8931  | 187.1125  |
| 222.4105  | 234.4065  | 290.6940  |
| 383.1021  | 418.6631  | 563.0746  |
| 597.7023  | 620.3676  | 657.7788  |
| 734.7096  | 777.5463  | 830.7555  |
| 877.2384  | 952.7793  | 1043.5024 |
| 1190.9469 | 1384.0759 | 1427.6633 |
| 1640.0739 | 1905.8151 | 3367.2170 |

Zero-point correction (Hartree): 0.047949

TS.CF3OCFCF2OH.CF3OCFCFO+HF  
 -----



E(CCSD(T)/Aug-CC-pVDZ) (Hartree): -862.62002013  
E(CCSD/Aug-CC-pVDZ) (Hartree): -862.55533439  
T1 diagnostic: 0.017866  
E(MP2/Aug-CC-pVDZ) (Hartree): -862.53576873  
E(MP3/Aug-CC-pVDZ) (Hartree): -862.52686098  
E(PMP2/Aug-CC-pVDZ) (Hartree): -862.53782573  
E(PMP3/Aug-CC-pVDZ) (Hartree): -862.52814138  
E(PUHF/Aug-CC-pVDZ) (Hartree): -860.54313662  
E(UHF/Aug-CC-pVDZ) (Hartree): -860.53989298  
E(UM062X/Aug-CC-pVTZ) (Hartree): -864.39324575  
Electronic state : 2-A  
Cartesian coordinates (Angs):

|   |           |           |           |
|---|-----------|-----------|-----------|
| C | 1.556082  | -0.175304 | -0.376269 |
| C | 0.479334  | 0.755273  | -0.514002 |
| O | -0.745688 | 0.430512  | -0.912185 |
| F | 0.642071  | 1.959233  | -0.057421 |
| C | -1.619128 | -0.119969 | 0.026731  |
| F | -1.621320 | 0.598691  | 1.132480  |
| F | -1.272191 | -1.355312 | 0.315304  |
| F | -2.810145 | -0.108620 | -0.521387 |
| F | 1.339248  | -1.318588 | -0.962025 |
| O | 2.745198  | 0.171731  | -0.081777 |
| F | 1.387507  | -0.602490 | 1.444578  |
| H | 2.519656  | -0.134170 | 0.969177  |

Rotational constants (GHz): 1.8474200 0.8202600 0.7500100  
Vibrational harmonic frequencies (cm-1):

|            |           |           |
|------------|-----------|-----------|
| i1374.2634 | 38.9989   | 61.4906   |
| 83.4007    | 110.1025  | 157.3347  |
| 211.8273   | 278.0787  | 349.3974  |
| 370.1721   | 451.4480  | 463.6846  |
| 524.6076   | 554.5607  | 579.1052  |
| 632.8354   | 656.9980  | 699.8217  |
| 796.6602   | 842.8946  | 913.8695  |
| 943.2971   | 1170.9947 | 1241.5041 |
| 1309.4966  | 1350.2878 | 1432.0946 |
| 1492.3127  | 1648.5753 | 2223.0076 |

Zero-point correction (Hartree): 0.049183

TS.CF3OCFCF2OH.CF3OCFHCF2O

-----  
E(CCSD(T)/Aug-CC-pVDZ) (Hartree): -862.61672615  
E(CCSD/Aug-CC-pVDZ) (Hartree): -862.55411607  
T1 diagnostic: 0.019024  
E(MP2/Aug-CC-pVDZ) (Hartree): -862.52060322  
E(MP3/Aug-CC-pVDZ) (Hartree): -862.52494024  
E(PMP2/Aug-CC-pVDZ) (Hartree): -862.52743790  
E(PMP3/Aug-CC-pVDZ) (Hartree): -862.52909278  
E(PUHF/Aug-CC-pVDZ) (Hartree): -860.55284052  
E(UHF/Aug-CC-pVDZ) (Hartree): -860.54339114  
E(UM062X/Aug-CC-pVTZ) (Hartree): -864.38698276  
Electronic state : 2-A  
Cartesian coordinates (Angs):

|   |           |           |           |
|---|-----------|-----------|-----------|
| C | -1.804584 | -0.246054 | 0.005822  |
| C | -0.462313 | 0.445265  | 0.028629  |
| O | 0.545804  | -0.210806 | -0.603969 |
| F | -2.827331 | 0.537295  | -0.340948 |
| F | -0.468615 | 1.757231  | -0.168416 |
| F | -1.878282 | -1.356963 | -0.726917 |
| O | -1.746009 | -0.494039 | 1.353106  |
| H | -0.586774 | 0.133735  | 1.306255  |
| C | 1.796478  | -0.137223 | -0.038498 |
| F | 1.798170  | -0.682814 | 1.170723  |
| F | 2.207568  | 1.115582  | 0.077505  |
| F | 2.614148  | -0.799987 | -0.820287 |

Rotational constants (GHz): 2.1031100 0.6925800 0.6373700  
Vibrational harmonic frequencies (cm-1):

|            |          |          |
|------------|----------|----------|
| i1996.4691 | 22.5775  | 63.9986  |
| 86.7921    | 162.5658 | 208.0786 |
| 276.0575   | 332.5992 | 365.4500 |
| 429.7050   | 481.7408 | 531.8349 |
| 551.9575   | 591.4560 | 638.1031 |

|           |           |           |
|-----------|-----------|-----------|
| 657.9074  | 728.9378  | 758.0103  |
| 899.1180  | 935.4871  | 1089.4735 |
| 1173.2517 | 1189.6807 | 1222.2583 |
| 1258.2395 | 1277.8000 | 1317.2779 |
| 1353.5748 | 1463.1174 | 2014.8314 |

Zero-point correction (Hartree): 0.050306

TS.CF3OCFCFO.CFOCFO+CF3

-----

E(CCSD(T)/Aug-CC-pVDZ) (Hartree): -762.37291173  
E(CCSD/Aug-CC-pVDZ) (Hartree): -762.31353776  
T1 diagnostic: 0.024691  
E(MP2/Aug-CC-pVDZ) (Hartree): -762.28306046  
E(MP3/Aug-CC-pVDZ) (Hartree): -762.27742277  
E(PMP2/Aug-CC-pVDZ) (Hartree): -762.29903778  
E(PMP3/Aug-CC-pVDZ) (Hartree): -762.28901160  
E(PUHF/Aug-CC-pVDZ) (Hartree): -760.55094787  
E(UHF/Aug-CC-pVDZ) (Hartree): -760.53247703  
E(RHF-RMP2/AUG-CC-PVDZ) (Hartree): -762.39039281  
T1 diagnostic: 0.000789  
E(RHF-UCCSD(T)-F12a/AUG-CC-PVDZ) (Hartree): -763.03266543  
E(RHF-UCCSD(T)-F12b/AUG-CC-PVDZ) (Hartree): -762.97609684  
E(RHF-UCCSD-F12a/AUG-CC-PVDZ) (Hartree): -762.97438622  
T1 diagnostic: 0.021568  
D1 diagnostic: 0.119084  
E(RHF-UCCSD-F12b/AUG-CC-PVDZ) (Hartree): -762.91781763  
E(RHF-UCCSD-T-F12a/AUG-CC-PVDZ) (Hartree): -763.03175773  
E(RHF-UCCSD-T-F12b/AUG-CC-PVDZ) (Hartree): -762.97518913  
E(RHF-UCCSD[T]-F12a/AUG-CC-PVDZ) (Hartree): -763.03792702  
E(RHF-UCCSD[T]-F12b/AUG-CC-PVDZ) (Hartree): -762.98135842  
E(ROHF/AUG-CC-PVDZ) (Hartree): -760.51923147  
E(UM062X/Aug-CC-pVTZ) (Hartree): -763.94798878  
Electronic state : 2-A  
Cartesian coordinates (Angs):

|   |           |           |           |
|---|-----------|-----------|-----------|
| C | 1.882104  | -0.383208 | 0.020853  |
| C | 0.890233  | 0.639866  | -0.434929 |
| O | -0.125158 | 0.408804  | -1.054218 |
| F | 1.189742  | 1.856701  | -0.021705 |
| C | -1.681629 | -0.085399 | 0.087392  |
| F | -2.544698 | 0.887351  | 0.128964  |
| F | -1.113469 | -0.290508 | 1.249035  |
| F | -2.180694 | -1.173108 | -0.417159 |
| F | 1.454279  | -1.602365 | -0.291486 |
| O | 2.901323  | -0.175078 | 0.570625  |

Rotational constants (GHz): 2.2250000 0.8638900 0.7306400  
Vibrational harmonic frequencies (cm-1):

|           |           |           |
|-----------|-----------|-----------|
| i469.8749 | 29.9762   | 40.4820   |
| 60.0664   | 98.7742   | 147.1805  |
| 218.5968  | 269.6410  | 432.5613  |
| 460.9035  | 527.0947  | 531.1295  |
| 576.9237  | 672.4402  | 678.7719  |
| 782.1003  | 844.4182  | 1030.0366 |
| 1169.8016 | 1316.6842 | 1353.2941 |
| 1375.1597 | 1591.0766 | 1938.2571 |

Zero-point correction (Hartree): 0.036782

TS.CF3OCFCF2OH.CF3+HOFC2CFO.b

-----

E(CCSD(T)/Aug-CC-pVDZ) (Hartree): -862.64143690  
E(CCSD/Aug-CC-pVDZ) (Hartree): -862.57833043  
T1 diagnostic: 0.021296  
E(MP2/Aug-CC-pVDZ) (Hartree): -862.54305868  
E(MP3/Aug-CC-pVDZ) (Hartree): -862.54315242  
E(PMP2/Aug-CC-pVDZ) (Hartree): -862.55766115  
E(PMP3/Aug-CC-pVDZ) (Hartree): -862.55337565  
E(PUHF/Aug-CC-pVDZ) (Hartree): -860.58559720  
E(UHF/Aug-CC-pVDZ) (Hartree): -860.56828990  
E(ROHF/AUG-CC-PVDZ) (Hartree): -860.53719978  
E(UM062X/Aug-CC-pVTZ) (Hartree): -864.41264558  
Electronic state : 2-A  
Cartesian coordinates (Angs):

|                                          |           |           |           |  |
|------------------------------------------|-----------|-----------|-----------|--|
| C                                        | 1.643618  | -0.317813 | 0.007686  |  |
| C                                        | 0.592362  | 0.686344  | -0.435467 |  |
| O                                        | -0.428319 | 0.391852  | -1.050652 |  |
| F                                        | 0.786050  | 1.907760  | 0.024192  |  |
| C                                        | -1.895640 | -0.104331 | 0.032360  |  |
| F                                        | -1.403107 | -0.125308 | 1.243888  |  |
| F                                        | -2.269831 | -1.290869 | -0.362798 |  |
| F                                        | -2.847050 | 0.774481  | -0.096808 |  |
| F                                        | 2.827480  | 0.037615  | -0.545708 |  |
| O                                        | 1.306590  | -1.581765 | -0.315238 |  |
| F                                        | 1.818142  | -0.245982 | 1.335655  |  |
| H                                        | 0.726653  | -1.585167 | -1.086147 |  |
| Rotational constants (GHz):              | 1.9442600 | 0.7014200 | 0.6381900 |  |
| Vibrational harmonic frequencies (cm-1): |           |           |           |  |
| i554.9889                                | 30.7411   |           | 40.2811   |  |
| 52.2054                                  | 102.6362  |           | 170.8503  |  |
| 203.8192                                 | 224.4021  |           | 252.8621  |  |
| 287.5366                                 | 416.7374  |           | 441.2303  |  |
| 510.9703                                 | 530.2345  |           | 543.7918  |  |
| 603.1876                                 | 643.0244  |           | 686.5523  |  |
| 716.5144                                 | 825.8487  |           | 1036.4248 |  |
| 1097.3670                                | 1150.3383 |           | 1251.7802 |  |
| 1339.0225                                | 1351.7626 |           | 1361.6419 |  |
| 1430.9888                                | 1552.9938 |           | 3834.9776 |  |
| Zero-point correction (Hartree):         | 0.051693  |           |           |  |

TS.CF3OCFOCF2OH.CF2OH+CF3OCFO

-----

E(CCSD(T)/Aug-CC-pVDZ) (Hartree): -937.74202802  
E(CCSD/Aug-CC-pVDZ) (Hartree): -937.67388820  
T1 diagnostic: 0.021478  
E(MP2/Aug-CC-pVDZ) (Hartree): -937.63715236  
E(MP3/Aug-CC-pVDZ) (Hartree): -937.64267252  
E(PMP2/Aug-CC-pVDZ) (Hartree): -937.64083195  
E(PMP3/Aug-CC-pVDZ) (Hartree): -937.64508852  
E(PUHF/Aug-CC-pVDZ) (Hartree): -935.48985728  
E(UHF/Aug-CC-pVDZ) (Hartree): -935.48447937  
E(UM062X/Aug-CC-pVTZ) (Hartree): -939.67113747  
Electronic state : 2-A  
Cartesian coordinates (Angs):

|                                          |           |           |           |  |
|------------------------------------------|-----------|-----------|-----------|--|
| C                                        | 1.423577  | -0.537545 | -0.032357 |  |
| C                                        | 0.524255  | 0.910984  | 0.047453  |  |
| O                                        | -0.730656 | 0.759311  | -0.543005 |  |
| F                                        | 1.174813  | 1.719825  | -0.809178 |  |
| C                                        | -1.695078 | -0.065255 | -0.040411 |  |
| F                                        | -1.726008 | -0.092379 | 1.281715  |  |
| F                                        | -1.536173 | -1.309415 | -0.477289 |  |
| F                                        | -2.852315 | 0.385085  | -0.488265 |  |
| F                                        | 1.293460  | -0.958347 | -1.272796 |  |
| O                                        | 2.707097  | -0.309166 | 0.234017  |  |
| F                                        | 0.848204  | -1.409986 | 0.792731  |  |
| H                                        | 2.794963  | 0.114579  | 1.098074  |  |
| O                                        | 0.632395  | 1.177764  | 1.285430  |  |
| Rotational constants (GHz):              | 1.5704300 | 0.7679200 | 0.6989100 |  |
| Vibrational harmonic frequencies (cm-1): |           |           |           |  |
| i332.3175                                | 43.4372   |           | 75.3512   |  |
| 118.8831                                 | 167.9631  |           | 196.3794  |  |
| 227.2453                                 | 275.4721  |           | 332.6196  |  |
| 340.9035                                 | 361.0959  |           | 389.5071  |  |
| 429.9941                                 | 461.1038  |           | 544.2182  |  |
| 559.9386                                 | 579.3278  |           | 627.3729  |  |
| 675.8678                                 | 732.9627  |           | 741.3972  |  |
| 863.7859                                 | 970.7471  |           | 1053.9986 |  |
| 1159.9015                                | 1187.5700 |           | 1263.0971 |  |
| 1277.1348                                | 1308.8452 |           | 1316.7117 |  |
| 1391.0107                                | 1438.9925 |           | 3823.7297 |  |
| Zero-point correction (Hartree):         | 0.056810  |           |           |  |

TS.CF3OCFOCF2OH.CF3O+HOCF2CFO

-----

E(CCSD(T)/Aug-CC-pVDZ) (Hartree): -937.71943602

E (CCSD/Aug-CC-pVDZ) (Hartree): -937.64922839  
 T1 diagnostic: 0.021029  
 E (MP2/Aug-CC-pVDZ) (Hartree): -937.60911516  
 E (MP3/Aug-CC-pVDZ) (Hartree): -937.61365277  
 E (PMP2/Aug-CC-pVDZ) (Hartree): -937.62395586  
 E (PMP3/Aug-CC-pVDZ) (Hartree): -937.62379711  
 E (PUHF/Aug-CC-pVDZ) (Hartree): -935.47239880  
 E (UHF/Aug-CC-pVDZ) (Hartree): -935.45430877  
 E (UM062X/Aug-CC-pVTZ) (Hartree): -939.63900777  
 Electronic state : 2-A  
 Cartesian coordinates (Angs):

|   |           |           |           |
|---|-----------|-----------|-----------|
| C | 1.466486  | -0.510372 | -0.011660 |
| C | 0.866124  | 0.911549  | 0.115324  |
| O | -0.831182 | 0.791376  | -0.533606 |
| F | 1.337547  | 1.693055  | -0.836794 |
| C | -1.778961 | -0.080304 | -0.047648 |
| F | -1.817105 | -0.089910 | 1.268798  |
| F | -1.570140 | -1.315568 | -0.481429 |
| F | -2.944991 | 0.328536  | -0.525151 |
| F | 1.323347  | -0.953977 | -1.252681 |
| O | 2.790918  | -0.488665 | 0.280771  |
| F | 0.799006  | -1.318774 | 0.826258  |
| H | 2.912051  | -0.421763 | 1.235664  |
| O | 0.492400  | 1.373073  | 1.182489  |

Rotational constants (GHz): 1.5631000 0.7213300 0.6548900  
 Vibrational harmonic frequencies (cm-1):

|           |           |           |
|-----------|-----------|-----------|
| i628.7103 | 40.6591   | 62.2319   |
| 115.2759  | 129.0157  | 161.0747  |
| 216.4083  | 244.9752  | 250.9064  |
| 294.7989  | 379.6499  | 386.5131  |
| 431.6183  | 450.4395  | 496.0167  |
| 565.1062  | 591.5541  | 613.9707  |
| 652.3146  | 675.3761  | 698.8486  |
| 826.7784  | 929.1785  | 1123.6266 |
| 1135.5794 | 1195.3604 | 1253.2480 |
| 1283.2263 | 1297.8371 | 1341.1639 |
| 1401.9115 | 1574.4071 | 3844.1724 |

Zero-point correction (Hartree): 0.056187

TS.CF3OCFOCF2OH.F+HOCHF2COOCH3  
 -----

E (CCSD(T)/Aug-CC-pVDZ) (Hartree): -937.71185877  
 E (CCSD/Aug-CC-pVDZ) (Hartree): -937.64208949  
 T1 diagnostic: 0.021073  
 E (MP2/Aug-CC-pVDZ) (Hartree): -937.60199907  
 E (MP3/Aug-CC-pVDZ) (Hartree): -937.60717835  
 E (PMP2/Aug-CC-pVDZ) (Hartree): -937.61411966  
 E (PMP3/Aug-CC-pVDZ) (Hartree): -937.61552018  
 E (PUHF/Aug-CC-pVDZ) (Hartree): -935.46831054  
 E (UHF/Aug-CC-pVDZ) (Hartree): -935.45360121  
 E (UM062X/Aug-CC-pVTZ) (Hartree): -939.62871153  
 Electronic state : 2-A  
 Cartesian coordinates (Angs):

|   |           |           |           |
|---|-----------|-----------|-----------|
| C | 1.797299  | -0.357837 | -0.024446 |
| C | 0.394143  | 0.223616  | 0.263938  |
| O | -0.559790 | -0.484117 | -0.334062 |
| F | 0.557327  | 1.791532  | -0.747198 |
| C | -1.891841 | -0.204733 | -0.041423 |
| F | -2.187932 | 1.047922  | -0.310492 |
| F | -2.151156 | -0.455370 | 1.227252  |
| F | -2.607134 | -1.002080 | -0.800031 |
| F | 1.941340  | -0.596897 | -1.327946 |
| O | 2.776898  | 0.436665  | 0.421449  |
| F | 1.821497  | -1.560892 | 0.596334  |
| H | 2.414389  | 1.132145  | 0.986166  |
| O | 0.210707  | 1.032907  | 1.173131  |

Rotational constants (GHz): 1.6432800 0.6407200 0.5926400  
 Vibrational harmonic frequencies (cm-1):

|           |          |          |
|-----------|----------|----------|
| i580.4901 | 51.2225  | 64.6886  |
| 87.4923   | 128.4582 | 153.5557 |
| 194.8202  | 228.0485 | 234.7415 |

|           |           |           |
|-----------|-----------|-----------|
| 321.3706  | 343.3728  | 377.8342  |
| 435.4696  | 452.3041  | 522.0948  |
| 566.7010  | 594.7533  | 617.1754  |
| 657.0881  | 678.1758  | 768.1261  |
| 898.6162  | 930.4179  | 1108.0816 |
| 1177.1383 | 1192.6682 | 1283.9011 |
| 1310.2182 | 1344.4806 | 1367.1172 |
| 1453.0168 | 1608.3332 | 3809.0531 |

Zero-point correction (Hartree): 0.056864

TS.CF3OCFOCFO.CF3OCFO+CFO

-----  
E(CCSD(T)/Aug-CC-pVDZ) (Hartree): -837.46524178  
E(CCSD/Aug-CC-pVDZ) (Hartree): -837.39834265  
T1 diagnostic: 0.023844  
E(MP2/Aug-CC-pVDZ) (Hartree): -837.37162475  
E(MP3/Aug-CC-pVDZ) (Hartree): -837.36400140  
E(PMP2/Aug-CC-pVDZ) (Hartree): -837.38168932  
E(PMP3/Aug-CC-pVDZ) (Hartree): -837.37073540  
E(PUHF/Aug-CC-pVDZ) (Hartree): -835.43430294  
E(UHF/Aug-CC-pVDZ) (Hartree): -835.42138532  
E(UM062X/Aug-CC-pVTZ) (Hartree): -839.19865386

Electronic state : 2-A

Cartesian coordinates (Angs):

|   |           |           |           |
|---|-----------|-----------|-----------|
| C | -1.879207 | 0.546995  | -0.115421 |
| C | -0.591487 | -0.779432 | 0.150928  |
| O | 0.431770  | -0.382353 | -0.695201 |
| F | -1.191844 | -1.801725 | -0.454384 |
| C | 1.574872  | 0.123791  | -0.124111 |
| F | 2.132703  | -0.751298 | 0.695389  |
| F | 1.347212  | 1.242918  | 0.543153  |
| F | 2.404375  | 0.378072  | -1.115463 |
| F | -1.357463 | 1.699910  | 0.174938  |
| O | -2.963318 | 0.289452  | -0.434282 |
| O | -0.548442 | -0.689476 | 1.371849  |

Rotational constants (GHz): 1.8991800 0.8400000 0.7230500

Vibrational harmonic frequencies (cm-1):

|           |           |           |
|-----------|-----------|-----------|
| i370.8262 | 42.7355   | 64.9691   |
| 89.2924   | 159.4585  | 186.9478  |
| 208.2233  | 297.4666  | 376.8775  |
| 390.2583  | 418.8619  | 481.9112  |
| 555.8845  | 607.3861  | 631.3872  |
| 679.9620  | 696.7828  | 747.4453  |
| 889.4183  | 1007.4192 | 1136.9004 |
| 1203.0303 | 1263.4581 | 1287.5968 |
| 1329.2013 | 1571.1631 | 2022.8479 |

Zero-point correction (Hartree): 0.041797

TS.CF3OCFOCFO.CF3OCOCFO+F

-----  
E(CCSD(T)/Aug-CC-pVDZ) (Hartree): -837.43219275  
E(CCSD/Aug-CC-pVDZ) (Hartree): -837.36003044  
T1 diagnostic: 0.021182  
E(MP2/Aug-CC-pVDZ) (Hartree): -837.35010221  
E(MP3/Aug-CC-pVDZ) (Hartree): -837.32777222  
E(PMP2/Aug-CC-pVDZ) (Hartree): -837.35888663  
E(PMP3/Aug-CC-pVDZ) (Hartree): -837.33323747  
E(PUHF/Aug-CC-pVDZ) (Hartree): -835.37222406  
E(UHF/Aug-CC-pVDZ) (Hartree): -835.36068024  
E(UM062X/Aug-CC-pVTZ) (Hartree): -839.16044089

Electronic state : 2-A

Cartesian coordinates (Angs):

|   |           |           |           |
|---|-----------|-----------|-----------|
| C | 2.065619  | 0.204204  | -0.230711 |
| C | 0.486934  | -0.505151 | -0.000707 |
| O | -0.403153 | 0.500511  | 0.059028  |
| F | 1.460745  | -0.157452 | 1.379908  |
| C | -1.743650 | 0.146473  | -0.051731 |
| F | -2.081639 | -0.721503 | 0.880000  |
| F | -2.001338 | -0.367288 | -1.238136 |
| F | -2.426088 | 1.256074  | 0.105014  |
| F | 1.944933  | 1.501271  | -0.219434 |

|                                          |           |           |           |  |
|------------------------------------------|-----------|-----------|-----------|--|
| O                                        | 2.954348  | -0.441787 | -0.619895 |  |
| O                                        | 0.333439  | -1.642858 | -0.247542 |  |
| Rotational constants (GHz):              | 2.2089000 | 0.7157400 | 0.6676600 |  |
| Vibrational harmonic frequencies (cm-1): |           |           |           |  |
| i441.4778                                | 36.9800   |           | 71.6160   |  |
| 129.2402                                 | 159.6948  |           | 198.1710  |  |
| 256.6988                                 | 322.1329  |           | 377.8939  |  |
| 396.1222                                 | 430.4005  |           | 437.5991  |  |
| 557.0824                                 | 590.6606  |           | 622.6895  |  |
| 660.1061                                 | 678.0296  |           | 706.8826  |  |
| 838.5195                                 | 907.3406  |           | 1110.8786 |  |
| 1159.1472                                | 1211.7602 |           | 1304.6640 |  |
| 1348.7953                                | 1853.4532 |           | 1948.1994 |  |
| Zero-point correction (Hartree):         | 0.041724  |           |           |  |

TS.CF3OCFOCFO.FCOCFO+CF3O

-----  
E(CCSD(T)/Aug-CC-pVDZ) (Hartree): -837.44812455  
E(CCSD/Aug-CC-pVDZ) (Hartree): -837.38134344  
T1 diagnostic: 0.022634  
E(MP2/Aug-CC-pVDZ) (Hartree): -837.34757892  
E(MP3/Aug-CC-pVDZ) (Hartree): -837.34565704  
E(PMP2/Aug-CC-pVDZ) (Hartree): -837.36389217  
E(PMP3/Aug-CC-pVDZ) (Hartree): -837.35697153  
E(PUHF/Aug-CC-pVDZ) (Hartree): -835.43202413  
E(UHF/Aug-CC-pVDZ) (Hartree): -835.41233663  
E(UM062X/Aug-CC-pVTZ) (Hartree): -839.17012119

Electronic state : 2-A

Cartesian coordinates (Angs):

|   |           |           |           |
|---|-----------|-----------|-----------|
| C | 1.615557  | -0.611459 | 0.167332  |
| C | 1.010145  | 0.802606  | 0.143083  |
| O | -0.557765 | 0.531430  | -0.734433 |
| F | 1.596647  | 1.548703  | -0.773627 |
| C | -1.563351 | -0.131506 | -0.075447 |
| F | -2.257598 | 0.657755  | 0.717746  |
| F | -1.095564 | -1.145694 | 0.641700  |
| F | -2.353915 | -0.600421 | -1.027964 |
| F | 1.822958  | -1.054577 | -1.060247 |
| O | 1.879264  | -1.206063 | 1.139665  |
| O | 0.455144  | 1.298416  | 1.108733  |

|                                          |           |           |           |
|------------------------------------------|-----------|-----------|-----------|
| Rotational constants (GHz):              | 1.7192600 | 0.8504700 | 0.7798900 |
| Vibrational harmonic frequencies (cm-1): |           |           |           |
| i648.6765                                | 23.7542   |           | 53.6856   |
| 92.7687                                  | 132.3501  |           | 160.0546  |
| 231.5583                                 | 264.8513  |           | 335.0105  |
| 408.8784                                 | 432.9679  |           | 469.9908  |
| 531.8542                                 | 617.6893  |           | 632.7302  |
| 665.5211                                 | 682.2925  |           | 764.5716  |
| 829.1010                                 | 931.1272  |           | 1156.2570 |
| 1209.1234                                | 1274.5178 |           | 1295.0814 |
| 1323.6037                                | 1581.3031 |           | 1988.3552 |
| Zero-point correction (Hartree):         | 0.041210  |           |           |

TS.CF3OCFOHCF2.CF3OCFCF2+OH

-----  
E(CCSD(T)/Aug-CC-pVDZ) (Hartree): -862.59673149  
E(CCSD/Aug-CC-pVDZ) (Hartree): -862.53431566  
T1 diagnostic: 0.023363  
E(MP2/Aug-CC-pVDZ) (Hartree): -862.49349129  
E(MP3/Aug-CC-pVDZ) (Hartree): -862.50288816  
E(PMP2/Aug-CC-pVDZ) (Hartree): -862.50215836  
E(PMP3/Aug-CC-pVDZ) (Hartree): -862.50924109  
E(PUHF/Aug-CC-pVDZ) (Hartree): -860.54255594  
E(UHF/Aug-CC-pVDZ) (Hartree): -860.53245923  
E(UM062X/Aug-CC-pVTZ) (Hartree): -864.36683411

Electronic state : 2-A

Cartesian coordinates (Angs):

|   |           |           |           |
|---|-----------|-----------|-----------|
| C | 1.436578  | 0.525811  | -0.240306 |
| C | 0.563514  | -0.483445 | -0.106182 |
| O | -0.547336 | -0.386869 | 0.658071  |
| F | 0.685200  | -1.578384 | -0.812154 |

|                                          |           |           |           |  |
|------------------------------------------|-----------|-----------|-----------|--|
| C                                        | -1.682096 | 0.076497  | 0.032129  |  |
| F                                        | -1.998175 | -0.670863 | -1.013818 |  |
| F                                        | -1.518767 | 1.323532  | -0.390273 |  |
| F                                        | -2.652741 | 0.037621  | 0.913973  |  |
| F                                        | 1.315673  | 1.656418  | 0.390785  |  |
| F                                        | 2.496295  | 0.450046  | -0.979172 |  |
| O                                        | 1.994672  | -1.004276 | 1.432824  |  |
| H                                        | 1.565972  | -0.549355 | 2.174937  |  |
| Rotational constants (GHz):              | 1.7590800 | 0.7611000 | 0.7045100 |  |
| Vibrational harmonic frequencies (cm-1): |           |           |           |  |
| i208.6375                                | 34.5023   |           | 79.1320   |  |
| 105.1782                                 | 118.6201  |           | 143.5370  |  |
| 202.4421                                 | 213.5280  |           | 277.9692  |  |
| 344.0591                                 | 363.3976  |           | 422.4983  |  |
| 467.5007                                 | 512.1654  |           | 545.7766  |  |
| 562.7722                                 | 641.5639  |           | 651.2857  |  |
| 705.1343                                 | 713.5189  |           | 841.3200  |  |
| 946.9926                                 | 1221.2347 |           | 1237.4507 |  |
| 1273.2712                                | 1348.5922 |           | 1389.0336 |  |
| 1438.6167                                | 1803.3672 |           | 3784.1755 |  |
| Zero-point correction (Hartree):         | 0.051005  |           |           |  |

TS.CF3OCFOHCF2.CF3OCFOCF2H

-----

E(CCSD(T)/Aug-CC-pVDZ) (Hartree): -862.60971245  
E(CCSD/Aug-CC-pVDZ) (Hartree): -862.54705959  
T1 diagnostic: 0.019146  
E(MP2/Aug-CC-pVDZ) (Hartree): -862.51333376  
E(MP3/Aug-CC-pVDZ) (Hartree): -862.51764804  
E(PMP2/Aug-CC-pVDZ) (Hartree): -862.52035324  
E(PMP3/Aug-CC-pVDZ) (Hartree): -862.52192476  
E(PUHF/Aug-CC-pVDZ) (Hartree): -860.54543759  
E(UHF/Aug-CC-pVDZ) (Hartree): -860.53576565  
E(UM062X/Aug-CC-pVTZ) (Hartree): -864.37996583  
Electronic state : 2-A  
Cartesian coordinates (Angs):

|                                          |           |           |           |  |
|------------------------------------------|-----------|-----------|-----------|--|
| C                                        | 0.584079  | -0.319081 | 0.166980  |  |
| C                                        | 1.971163  | 0.269459  | 0.084270  |  |
| F                                        | 2.860488  | -0.390354 | -0.626697 |  |
| O                                        | -0.405099 | 0.596571  | -0.142219 |  |
| F                                        | 2.079851  | 1.569393  | -0.082849 |  |
| F                                        | 0.414327  | -1.443539 | -0.549266 |  |
| O                                        | 0.749695  | -0.585351 | 1.512433  |  |
| H                                        | 1.955479  | -0.084164 | 1.358693  |  |
| C                                        | -1.706731 | 0.182334  | -0.087925 |  |
| F                                        | -2.457953 | 1.254972  | 0.060719  |  |
| F                                        | -1.920645 | -0.647007 | 0.925947  |  |
| F                                        | -2.065325 | -0.432560 | -1.205672 |  |
| Rotational constants (GHz):              | 2.0980500 | 0.7174500 | 0.6717500 |  |
| Vibrational harmonic frequencies (cm-1): |           |           |           |  |
| i2015.9899                               | 42.6400   |           | 69.2004   |  |
| 99.6316                                  | 121.9042  |           | 207.3065  |  |
| 270.9150                                 | 346.1038  |           | 362.3987  |  |
| 400.5431                                 | 453.6452  |           | 524.0217  |  |
| 536.6286                                 | 613.4970  |           | 641.1175  |  |
| 669.4857                                 | 713.1116  |           | 781.4713  |  |
| 861.0625                                 | 951.0369  |           | 1083.7002 |  |
| 1143.3029                                | 1179.7979 |           | 1211.4550 |  |
| 1272.3321                                | 1292.3885 |           | 1330.0886 |  |
| 1331.9661                                | 1480.4397 |           | 2022.9537 |  |
| Zero-point correction (Hartree):         | 0.050152  |           |           |  |

TS.CF3OCFOHCF2.CF3OCOCF2+HF

-----

E(CCSD(T)/Aug-CC-pVDZ) (Hartree): -862.61401792  
E(CCSD/Aug-CC-pVDZ) (Hartree): -862.54899858  
T1 diagnostic: 0.018543  
E(MP2/Aug-CC-pVDZ) (Hartree): -862.52915280  
E(MP3/Aug-CC-pVDZ) (Hartree): -862.52017158  
E(PMP2/Aug-CC-pVDZ) (Hartree): -862.53110680  
E(PMP3/Aug-CC-pVDZ) (Hartree): -862.52140711

E(PUHF/Aug-CC-pVDZ) (Hartree): -860.53479003  
E(UHF/Aug-CC-pVDZ) (Hartree): -860.53171880  
E(UM062X/Aug-CC-pVTZ) (Hartree): -864.38724771  
Electronic state : 2-A  
Cartesian coordinates (Angs):

|   |           |           |           |
|---|-----------|-----------|-----------|
| C | -1.312258 | 0.760795  | -0.164717 |
| C | -0.758554 | -0.511710 | -0.477459 |
| O | 0.549150  | -0.672335 | -0.702377 |
| F | -1.070041 | -1.392942 | 1.206577  |
| C | 1.554121  | 0.000751  | -0.031792 |
| F | 1.243507  | 0.226919  | 1.226136  |
| F | 1.816906  | 1.153574  | -0.630045 |
| F | 2.620940  | -0.761173 | -0.097674 |
| F | -2.582001 | 0.885309  | -0.003054 |
| F | -0.630389 | 1.793135  | 0.206504  |
| O | -1.533504 | -1.426639 | -0.946334 |
| H | -1.615323 | -1.850619 | 0.057490  |

Rotational constants (GHz): 1.7230700 0.8863000 0.7393900  
Vibrational harmonic frequencies (cm-1):

|            |           |           |
|------------|-----------|-----------|
| i1223.2278 | 37.9054   | 86.3594   |
| 112.7170   | 126.5213  | 163.5551  |
| 210.2271   | 250.8651  | 360.5204  |
| 375.2722   | 393.6866  | 459.4113  |
| 504.3533   | 510.2285  | 566.2184  |
| 627.0775   | 648.9168  | 723.6016  |
| 788.0626   | 836.9924  | 911.0038  |
| 986.5642   | 1201.7558 | 1260.3519 |
| 1293.3931  | 1350.2492 | 1465.4356 |
| 1474.7543  | 1661.4034 | 2314.2668 |

Zero-point correction (Hartree): 0.049440

TS.CF3OCFOHCF2.CF3OCOHC3

-----  
E(CCS(D)/Aug-CC-pVDZ) (Hartree): -862.61664555  
E(CCS(D)/Aug-CC-pVDZ) (Hartree): -862.55182261  
T1 diagnostic: 0.017516  
E(MP2/Aug-CC-pVDZ) (Hartree): -862.53166476  
E(MP3/Aug-CC-pVDZ) (Hartree): -862.52541472  
E(PMP2/Aug-CC-pVDZ) (Hartree): -862.53497081  
E(PMP3/Aug-CC-pVDZ) (Hartree): -862.52736079  
E(PUHF/Aug-CC-pVDZ) (Hartree): -860.53732842  
E(UHF/Aug-CC-pVDZ) (Hartree): -860.53233584  
E(UM062X/Aug-CC-pVTZ) (Hartree): -864.39021090  
Electronic state : 2-A  
Cartesian coordinates (Angs):

|   |           |           |           |
|---|-----------|-----------|-----------|
| C | 1.248349  | -0.568850 | -0.260649 |
| C | 0.673860  | 0.686173  | -0.264747 |
| O | -0.614678 | 0.975595  | -0.075765 |
| C | -1.613908 | 0.031073  | -0.018360 |
| F | -1.563172 | -0.666071 | 1.097302  |
| F | -1.547144 | -0.797425 | -1.052973 |
| F | -2.747865 | 0.691339  | -0.067818 |
| F | 2.473231  | -0.728017 | -0.638377 |
| F | 0.670858  | -1.658911 | 0.108418  |
| O | 1.380495  | 1.739705  | -0.610560 |
| H | 2.125039  | 1.787772  | 0.014780  |
| F | 1.591715  | 0.447913  | 1.524377  |

Rotational constants (GHz): 1.8324500 0.8303900 0.7467900  
Vibrational harmonic frequencies (cm-1):

|           |           |           |
|-----------|-----------|-----------|
| i325.1781 | 33.4947   | 89.7242   |
| 146.9702  | 152.1645  | 192.9073  |
| 235.0765  | 268.2588  | 320.7191  |
| 366.9892  | 385.8086  | 433.2069  |
| 463.7913  | 508.6374  | 547.4901  |
| 575.3980  | 628.2495  | 652.0262  |
| 733.9534  | 813.0123  | 974.4926  |
| 1206.6632 | 1230.8965 | 1274.7873 |
| 1289.2789 | 1345.0598 | 1459.0618 |
| 1477.1835 | 1737.7700 | 3705.4499 |

Zero-point correction (Hartree): 0.052964



TS.CFOCF2OH.CFOCFO+HF

-----

E(CCSD(T)/Aug-CC-pVDZ) (Hartree): -525.67501740  
 E(CCSD/Aug-CC-pVDZ) (Hartree): -525.62938469  
 T1 diagnostic: 0.017762  
 E(MP2/Aug-CC-pVDZ) (Hartree): -525.62524209  
 E(MP3/Aug-CC-pVDZ) (Hartree): -525.60970230  
 E(RHF/Aug-CC-pVDZ) (Hartree): -524.34365141  
 E(CCSD(T)-F12a/AUG-CC-PVDZ) (Hartree): -526.13420652  
 E(CCSD(T)-F12b/AUG-CC-PVDZ) (Hartree): -526.09368003  
 E(CCSD-F12a/AUG-CC-PVDZ) (Hartree): -526.09008279  
 T1 diagnostic: 0.015939  
 D1 diagnostic: 0.062387  
 E(CCSD-F12b/AUG-CC-PVDZ) (Hartree): -526.04955631  
 E(CCSD-T-F12a/AUG-CC-PVDZ) (Hartree): -526.13317517  
 E(CCSD-T-F12b/AUG-CC-PVDZ) (Hartree): -526.09264868  
 E(CCSD[T]-F12a/AUG-CC-PVDZ) (Hartree): -526.13823069  
 E(CCSD[T]-F12b/AUG-CC-PVDZ) (Hartree): -526.09770420  
 E(RHF/AUG-CC-PVDZ) (Hartree): -524.34365140  
 E(RM062X/Aug-CC-pVTZ) (Hartree): -526.76180267

Electronic state : 1-A

Cartesian coordinates (Angs):

|   |           |           |           |
|---|-----------|-----------|-----------|
| C | -0.521730 | 0.218288  | -0.256601 |
| C | 0.990286  | 0.073453  | -0.038949 |
| O | 1.727696  | 0.951575  | 0.200869  |
| F | 1.350120  | -1.185959 | -0.187213 |
| F | -0.913873 | 1.432775  | -0.028416 |
| O | -1.186420 | -0.532654 | -1.012257 |
| F | -1.067457 | -0.695876 | 1.127884  |
| H | -1.460660 | -1.060285 | 0.054098  |

Rotational constants (GHz): 3.6577100 2.4959500 1.9794400

Vibrational harmonic frequencies (cm-1):

|            |           |           |
|------------|-----------|-----------|
| i1718.0616 | 59.8729   | 169.9897  |
| 239.4132   | 315.8077  | 407.4263  |
| 491.5837   | 637.4505  | 659.1799  |
| 723.6792   | 823.8337  | 873.0426  |
| 917.9924   | 1210.9887 | 1386.1750 |
| 1642.7519  | 1987.6056 | 2033.5102 |

Zero-point correction (Hartree): 0.033216

TS.CF3+OCFCF2OH.CF4+OCFCFOH

-----

E(CCSD(T)/Aug-CC-pVDZ) (Hartree): -862.60928919  
 E(CCSD/Aug-CC-pVDZ) (Hartree): -862.54248391  
 T1 diagnostic: 0.021610  
 E(MP2/Aug-CC-pVDZ) (Hartree): -862.51465178  
 E(MP3/Aug-CC-pVDZ) (Hartree): -862.50636818  
 E(PMP2/Aug-CC-pVDZ) (Hartree): -862.52848288  
 E(PMP3/Aug-CC-pVDZ) (Hartree): -862.51602616  
 E(PUHF/Aug-CC-pVDZ) (Hartree): -860.53522157  
 E(UHF/Aug-CC-pVDZ) (Hartree): -860.51870478  
 E(UM062X/Aug-CC-pVTZ) (Hartree): -864.37462523

Electronic state : 2-A

Cartesian coordinates (Angs):

|   |           |           |           |
|---|-----------|-----------|-----------|
| C | -1.320575 | 0.685812  | -0.015120 |
| C | -1.977503 | -0.634834 | -0.163911 |
| O | -2.272130 | -1.192534 | -1.155896 |
| F | -2.130870 | -1.185508 | 1.060254  |
| C | 2.105478  | -0.141260 | -0.003165 |
| F | 2.518447  | 0.051810  | 1.220336  |
| F | 2.618760  | 0.725365  | -0.829737 |
| F | 2.309447  | -1.368058 | -0.394799 |
| F | -1.340311 | 1.431340  | -1.083131 |
| O | -1.470709 | 1.396218  | 1.088526  |
| F | 0.318605  | 0.134282  | 0.002727  |
| H | -1.548391 | 0.809139  | 1.851308  |

Rotational constants (GHz): 1.6359200 0.5969900 0.5664500

Vibrational harmonic frequencies (cm-1):

|            |          |          |
|------------|----------|----------|
| i1064.4289 | 10.2986  | 47.6263  |
| 51.4001    | 98.9299  | 133.4582 |
| 187.5836   | 199.2136 | 236.2362 |

|           |           |           |
|-----------|-----------|-----------|
| 300.6501  | 330.2411  | 388.8668  |
| 418.1217  | 513.5960  | 534.6885  |
| 536.8198  | 552.7081  | 648.2857  |
| 714.4174  | 761.1712  | 832.7928  |
| 1043.2207 | 1101.4942 | 1207.7526 |
| 1351.6877 | 1358.7800 | 1424.5491 |
| 1479.7072 | 1935.0598 | 3835.1276 |

Zero-point correction (Hartree): 0.050654

TS.CF3+OCFCF2OH.HCF3+OCFCF2O

-----  
E(CCSD(T)/Aug-CC-pVDZ) (Hartree): -862.63813342  
E(CCSD/Aug-CC-pVDZ) (Hartree): -862.57501365  
T1 diagnostic: 0.020325  
E(MP2/Aug-CC-pVDZ) (Hartree): -862.54160471  
E(MP3/Aug-CC-pVDZ) (Hartree): -862.54336663  
E(PMP2/Aug-CC-pVDZ) (Hartree): -862.54575705  
E(PMP3/Aug-CC-pVDZ) (Hartree): -862.54595130  
E(PUHF/Aug-CC-pVDZ) (Hartree): -860.57613376  
E(UHF/Aug-CC-pVDZ) (Hartree): -860.56986068  
E(UM062X/Aug-CC-pVTZ) (Hartree): -864.40226723

Electronic state : 2-A

Cartesian coordinates (Angs):

|   |           |           |           |
|---|-----------|-----------|-----------|
| C | 1.287707  | 0.902589  | -0.109434 |
| C | 1.228456  | -0.641211 | -0.133815 |
| F | 2.407610  | 1.306273  | 0.464526  |
| O | 0.465996  | 1.631851  | -0.522222 |
| F | 1.156978  | -1.056976 | 1.145321  |
| F | 2.363450  | -1.118368 | -0.660409 |
| O | 0.219075  | -1.130316 | -0.888205 |
| H | -0.941948 | -0.458569 | -0.524408 |
| C | -1.922161 | -0.033622 | -0.011129 |
| F | -2.767482 | -1.037070 | 0.128362  |
| F | -1.610751 | 0.458920  | 1.174133  |
| F | -2.450098 | 0.900528  | -0.770368 |

Rotational constants (GHz): 1.7554700 0.6916500 0.6065400

Vibrational harmonic frequencies (cm-1):

|           |           |           |
|-----------|-----------|-----------|
| i944.6941 | 33.9637   | 45.9322   |
| 52.0862   | 91.1267   | 108.0265  |
| 160.6220  | 235.8734  | 245.2956  |
| 345.5741  | 421.3763  | 438.1111  |
| 518.0687  | 526.0069  | 609.1327  |
| 646.6749  | 709.9752  | 783.4166  |
| 806.4170  | 870.0984  | 1128.1046 |
| 1142.4991 | 1192.5069 | 1232.1537 |
| 1265.9506 | 1289.3734 | 1332.7500 |
| 1358.0416 | 1422.5710 | 1979.9759 |

Zero-point correction (Hartree): 0.047823

TS.CFOCF2OH+CF3.CF4+OCCF2OH

-----  
E(CCSD(T)/Aug-CC-pVDZ) (Hartree): -862.59903132  
E(CCSD/Aug-CC-pVDZ) (Hartree): -862.53181085  
T1 diagnostic: 0.021581  
E(MP2/Aug-CC-pVDZ) (Hartree): -862.50284981  
E(MP3/Aug-CC-pVDZ) (Hartree): -862.49495069  
E(PMP2/Aug-CC-pVDZ) (Hartree): -862.51698383  
E(PMP3/Aug-CC-pVDZ) (Hartree): -862.50465381  
E(PUHF/Aug-CC-pVDZ) (Hartree): -860.52186956  
E(UHF/Aug-CC-pVDZ) (Hartree): -860.50486614  
E(UM062X/Aug-CC-pVTZ) (Hartree): -864.36185024

Electronic state : 2-A

Cartesian coordinates (Angs):

|   |           |           |           |
|---|-----------|-----------|-----------|
| C | 1.073557  | 0.938723  | -0.302073 |
| C | 1.893291  | -0.339558 | -0.013227 |
| O | 1.356232  | 2.029302  | -0.004132 |
| F | 1.690322  | -1.243401 | -0.966721 |
| F | 1.403048  | -0.850408 | 1.138355  |
| O | 3.212563  | -0.084822 | 0.068536  |
| H | 3.356729  | 0.777952  | 0.477902  |
| F | -0.533755 | 0.472006  | -0.409471 |

|                                          |           |           |           |  |
|------------------------------------------|-----------|-----------|-----------|--|
| C                                        | -2.163997 | -0.066748 | 0.016449  |  |
| F                                        | -2.667357 | -0.629599 | -1.044343 |  |
| F                                        | -2.026939 | -0.910107 | 0.998941  |  |
| F                                        | -2.834675 | 0.991698  | 0.372124  |  |
| Rotational constants (GHz):              | 1.9659000 | 0.5803500 | 0.5323400 |  |
| Vibrational harmonic frequencies (cm-1): |           |           |           |  |
| i1098.4268                               | 12.9482   |           | 34.1881   |  |
| 43.2479                                  | 70.8067   |           | 141.9630  |  |
| 172.2737                                 | 215.5960  |           | 241.4977  |  |
| 307.6501                                 | 318.4633  |           | 360.9121  |  |
| 445.1286                                 | 500.1687  |           | 538.5659  |  |
| 538.9492                                 | 581.7717  |           | 618.6026  |  |
| 690.1078                                 | 750.0476  |           | 880.8564  |  |
| 1049.3430                                | 1125.4035 |           | 1169.2282 |  |
| 1294.2123                                | 1363.7877 |           | 1365.5017 |  |
| 1394.2881                                | 1985.0453 |           | 3821.2553 |  |
| Zero-point correction (Hartree):         | 0.050192  |           |           |  |

TS.CFOCF2O.CFO+CF2O

```

-----
E(CCSD(T)/Aug-CC-pVDZ) (Hartree): -525.04961433
E(CCSD/Aug-CC-pVDZ) (Hartree): -525.00575542
  T1 diagnostic: 0.027180
E(MP2/Aug-CC-pVDZ) (Hartree): -524.98542696
E(MP3/Aug-CC-pVDZ) (Hartree): -524.97941667
E(PMP2/Aug-CC-pVDZ) (Hartree): -524.99602995
E(PMP3/Aug-CC-pVDZ) (Hartree): -524.98651874
E(PUHF/Aug-CC-pVDZ) (Hartree): -523.77194651
E(UHF/Aug-CC-pVDZ) (Hartree): -523.75842729
E(RHF-RMP2/AUG-CC-PVDZ) (Hartree): -525.06953066
  T1 diagnostic: 0.000268
E(RHF-UCCSD(T)-F12a/AUG-CC-PVDZ) (Hartree): -525.50712744
E(RHF-UCCSD(T)-F12b/AUG-CC-PVDZ) (Hartree): -525.46790236
E(RHF-UCCSD-F12a/AUG-CC-PVDZ) (Hartree): -525.46349363
  T1 diagnostic: 0.016960
  D1 diagnostic: 0.056838
E(RHF-UCCSD-F12b/AUG-CC-PVDZ) (Hartree): -525.42426856
E(RHF-UCCSD-T-F12a/AUG-CC-PVDZ) (Hartree): -525.50610936
E(RHF-UCCSD-T-F12b/AUG-CC-PVDZ) (Hartree): -525.46688428
E(RHF-UCCSD[T]-F12a/AUG-CC-PVDZ) (Hartree): -525.51085236
E(RHF-UCCSD[T]-F12b/AUG-CC-PVDZ) (Hartree): -525.47162728
E(ROHF/AUG-CC-PVDZ) (Hartree): -523.73968032
E(UM062X/Aug-CC-pVTZ) (Hartree): -526.13876657
Electronic state : 2-A

```

Cartesian coordinates (Angs):

|                                          |           |           |           |
|------------------------------------------|-----------|-----------|-----------|
| C                                        | 1.034634  | 0.162510  | -0.045069 |
| C                                        | -0.835679 | -0.057742 | 0.137164  |
| F                                        | 1.577481  | -1.016995 | -0.049748 |
| O                                        | 1.536504  | 1.207259  | -0.069259 |
| F                                        | -1.077515 | -0.874796 | -0.892121 |
| F                                        | -1.270166 | 1.148662  | -0.201935 |
| O                                        | -0.819245 | -0.449815 | 1.286967  |
| Rotational constants (GHz):              | 3.9225000 | 2.3782900 | 1.9750900 |
| Vibrational harmonic frequencies (cm-1): |           |           |           |
| i391.6888                                | 55.5061   |           | 168.5440  |
| 191.1711                                 | 303.7387  |           | 425.2446  |
| 536.0196                                 | 599.4151  |           | 643.9384  |
| 697.6817                                 | 928.6932  |           | 1147.5914 |
| 1224.1061                                | 1622.1894 |           | 2020.4906 |
| Zero-point correction (Hartree):         | 0.024067  |           |           |

TS.CFOCF2OH+H2O.CFOCFO+HF+H2O.a

```

-----
E(CCSD(T)/Aug-CC-pVDZ) (Hartree): -602.00307406
E(CCSD/Aug-CC-pVDZ) (Hartree): -601.95060972
  T1 diagnostic: 0.016785
E(MP2/Aug-CC-pVDZ) (Hartree): -601.94110899
E(MP3/Aug-CC-pVDZ) (Hartree): -601.92921718
E(RHF/Aug-CC-pVDZ) (Hartree): -600.43006680
E(CCSD(T)-F12a/AUG-CC-PVDZ) (Hartree): -602.53227995
E(CCSD(T)-F12b/AUG-CC-PVDZ) (Hartree): -602.48427164

```

E (CCSD-F12a/AUG-CC-PVDZ) (Hartree): -602.48159532  
 T1 diagnostic: 0.014827  
 D1 diagnostic: 0.059287  
 E (CCSD-F12b/AUG-CC-PVDZ) (Hartree): -602.43358701  
 E (CCSD-T-F12a/AUG-CC-PVDZ) (Hartree): -602.53127136  
 E (CCSD-T-F12b/AUG-CC-PVDZ) (Hartree): -602.48326305  
 E (CCSD[T]-F12a/AUG-CC-PVDZ) (Hartree): -602.53641579  
 E (CCSD[T]-F12b/AUG-CC-PVDZ) (Hartree): -602.48840748  
 E (RHF/AUG-CC-PVDZ) (Hartree): -600.43006678  
 E (RM062X/Aug-CC-pVTZ) (Hartree): -603.24766211  
 Electronic state : 1-A  
 Cartesian coordinates (Angs):  
 C -0.814999 0.738943 -0.154037  
 C -0.171044 -0.648419 -0.301181  
 F -2.058281 0.697710 0.282002  
 O -0.248261 1.747395 -0.384948  
 O 0.740999 -0.808852 -1.109902  
 F -1.018641 -1.630518 -0.075016  
 F 0.531945 -0.515102 1.262377  
 H 1.831870 -0.029684 -0.641654  
 O 2.385765 0.440331 0.146763  
 H 1.703336 0.091561 0.879984  
 H 2.257823 1.395189 0.053410  
 Rotational constants (GHz): 2.5596500 1.7880700 1.3795400  
 Vibrational harmonic frequencies (cm-1):  
 i634.5895 58.6533 99.6759  
 201.9683 246.3559 318.5067  
 359.3176 404.6756 502.9935  
 536.6809 551.2843 570.4571  
 641.3512 714.4591 737.5793  
 823.1345 860.3918 1186.6084  
 1344.6038 1453.5953 1526.9168  
 1615.6893 1726.2058 1952.4157  
 2077.5790 2525.7216 3816.3529  
 Zero-point correction (Hartree): 0.061176

TS.CFOCF2OH+H2O.CFOCFO+HF+H2O.b

-----  
 E (CCSD(T)/Aug-CC-pVDZ) (Hartree): -602.00221312  
 E (CCSD/Aug-CC-pVDZ) (Hartree): -601.94998022  
 T1 diagnostic: 0.016664  
 E (MP2/Aug-CC-pVDZ) (Hartree): -601.94016463  
 E (MP3/Aug-CC-pVDZ) (Hartree): -601.92849928  
 E (RHF/Aug-CC-pVDZ) (Hartree): -600.42936206  
 E (CCSD(T)-F12a/AUG-CC-PVDZ) (Hartree): -602.53116844  
 E (CCSD(T)-F12b/AUG-CC-PVDZ) (Hartree): -602.48317884  
 E (CCSD-F12a/AUG-CC-PVDZ) (Hartree): -602.48071017  
 T1 diagnostic: 0.014746  
 D1 diagnostic: 0.058358  
 E (CCSD-F12b/AUG-CC-PVDZ) (Hartree): -602.43272056  
 E (CCSD-T-F12a/AUG-CC-PVDZ) (Hartree): -602.53016264  
 E (CCSD-T-F12b/AUG-CC-PVDZ) (Hartree): -602.48217303  
 E (CCSD[T]-F12a/AUG-CC-PVDZ) (Hartree): -602.53522266  
 E (CCSD[T]-F12b/AUG-CC-PVDZ) (Hartree): -602.48723305  
 E (RHF/AUG-CC-PVDZ) (Hartree): -600.42936204  
 E (RM062X/Aug-CC-pVTZ) (Hartree): -603.24685084  
 Electronic state : 1-A  
 Cartesian coordinates (Angs):  
 C 1.073937 -0.599170 -0.058424  
 C 0.204028 0.645199 -0.258120  
 F 0.302512 -1.693366 -0.184836  
 O 2.224301 -0.659527 0.143898  
 O -0.647909 0.678940 -1.150882  
 F 0.885128 1.735323 0.019541  
 F -0.606116 0.436021 1.233275  
 H -1.791649 -0.016085 -0.728148  
 O -2.438286 -0.405476 0.036256  
 H -1.753059 -0.104516 0.801414  
 H -2.461642 -1.368882 -0.020004  
 Rotational constants (GHz): 2.5726800 1.7783000 1.3496700  
 Vibrational harmonic frequencies (cm-1):

|           |           |           |
|-----------|-----------|-----------|
| i680.6466 | 70.7687   | 74.8132   |
| 205.3512  | 239.9946  | 329.6123  |
| 353.3892  | 401.9789  | 500.4400  |
| 519.0699  | 540.4093  | 578.2923  |
| 659.1031  | 702.6761  | 733.0959  |
| 827.7661  | 856.6118  | 1131.0343 |
| 1324.0065 | 1411.1517 | 1459.8003 |
| 1608.1318 | 1714.7500 | 1999.3620 |
| 2035.1924 | 2480.1621 | 3849.2532 |

Zero-point correction (Hartree): 0.060613

\*\*\*\*\*  
 CF3CF=CF2 + OH : M06-2X/cc-pVDZ geometry  
 \*\*\*\*\*

CF3CFCF2

-----  
 E(RM062X/CC-pVDZ) (Hartree): -713.14454132  
 Electronic state : 1-A  
 Cartesian coordinates (Angs):  
 C 1.402535 -0.157078 -0.000002  
 C 0.241372 0.488409 -0.000029  
 C -1.119024 -0.134950 -0.000001  
 F 0.223975 1.823237 -0.000021  
 F 2.553768 0.463613 0.000017  
 F 1.543737 -1.455671 -0.000006  
 F -1.046686 -1.464353 -0.000102  
 F -1.812307 0.251056 1.074853  
 F -1.812409 0.251196 -1.074720  
 Rotational constants (GHz): 2.5537100 1.2667000 0.9927100  
 Vibrational harmonic frequencies (cm-1):  
 37.6737 129.4577 175.5998  
 247.7172 248.0135 367.1500  
 373.9281 474.5601 518.7231  
 586.9552 612.2294 669.6819  
 684.1958 790.8516 1075.6346  
 1260.1232 1271.3807 1295.6839  
 1408.1577 1472.8593 1912.1661  
 Zero-point correction (Hartree): 0.035568

CF2CFCF2OH

-----  
 E(RM062X/CC-pVDZ) (Hartree): -689.13327169  
 Electronic state : 1-A  
 Cartesian coordinates (Angs):  
 C 1.130387 -0.155677 -0.013341  
 C -0.237318 0.471407 0.012577  
 C -1.411410 -0.144718 -0.006079  
 F -0.194039 1.815783 0.032421  
 F 1.667032 -0.092489 1.234137  
 F 1.050162 -1.447904 -0.344061  
 F -1.572666 -1.441633 -0.024193  
 F -2.554524 0.495258 -0.004832  
 O 1.955663 0.450639 -0.905135  
 H 1.901059 1.407668 -0.759111  
 Rotational constants (GHz): 2.5271100 1.2794000 1.0000900  
 Vibrational harmonic frequencies (cm-1):  
 39.3905 129.6122 163.7252  
 237.8446 260.9031 293.8011  
 372.3207 380.1755 478.6689  
 514.6170 583.7531 609.4401  
 666.6879 686.9422 786.5067  
 1058.5628 1153.0456 1218.6495  
 1289.1613 1373.2415 1403.4459  
 1477.1091 1919.5303 3830.8603  
 Zero-point correction (Hartree): 0.047677

CF3CFCF2OH

-----  
 E(UM062X/CC-pVDZ) (Hartree): -788.93888163  
 Electronic state : 2-A  
 Cartesian coordinates (Angs):  
 C -1.303451 -0.125659 -0.031349  
 C -0.012458 0.591152 -0.341223  
 C 1.286070 -0.107464 -0.053253  
 F -0.017123 1.886270 -0.079736  
 F -2.313601 0.450548 -0.687155  
 F -1.164890 -1.396558 -0.483118  
 F 1.227696 -0.716933 1.160464  
 F 1.545173 -1.055425 -0.945956  
 F 2.293452 0.753572 -0.023522

|                                           |           |           |           |           |
|-------------------------------------------|-----------|-----------|-----------|-----------|
| O                                         | -1.631398 | -0.113679 | 1.288385  |           |
| H                                         | -0.906144 | -0.532003 | 1.779079  |           |
| Rotational constants (GHz):               | 2.0845200 |           | 1.0701800 | 0.9353500 |
| Vibrational harmonic frequencies (cm-1):  |           |           |           |           |
| 48.3876                                   |           | 68.2928   |           | 150.0408  |
| 172.5356                                  |           | 253.2285  |           | 295.2930  |
| 326.2258                                  |           | 347.4436  |           | 364.4615  |
| 460.5885                                  |           | 514.9848  |           | 540.8673  |
| 554.7354                                  |           | 619.6182  |           | 691.2520  |
| 710.6764                                  |           | 801.7906  |           | 1006.1738 |
| 1160.7549                                 |           | 1173.7163 |           | 1224.9472 |
| 1264.1820                                 |           | 1315.2839 |           | 1390.6640 |
| 1434.8583                                 |           | 1480.1216 |           | 3820.5567 |
| Zero-point correction (Hartree): 0.050556 |           |           |           |           |

CF3CFOHCF2

-----

E(UM062X/CC-pVDZ) (Hartree): -788.92967318

Electronic state : 2-A

Cartesian coordinates (Angs):

|                                           |           |           |           |           |
|-------------------------------------------|-----------|-----------|-----------|-----------|
| C                                         | 1.492087  | 0.117492  | -0.010636 |           |
| C                                         | 0.093616  | 0.696578  | -0.072352 |           |
| C                                         | -0.996979 | -0.381197 | 0.052457  |           |
| F                                         | -0.042576 | 1.250952  | -1.315383 |           |
| F                                         | 1.828803  | -0.668544 | -1.012126 |           |
| F                                         | 1.818916  | -0.409933 | 1.155231  |           |
| F                                         | -0.879622 | -1.016590 | 1.216775  |           |
| F                                         | -2.205770 | 0.161420  | -0.022284 |           |
| F                                         | -0.865974 | -1.271564 | -0.930083 |           |
| O                                         | -0.129021 | 1.596847  | 0.924706  |           |
| H                                         | 0.615840  | 2.216318  | 0.956367  |           |
| Rotational constants (GHz):               | 1.7887100 |           | 1.1952500 | 1.1640100 |
| Vibrational harmonic frequencies (cm-1):  |           |           |           |           |
| 29.8252                                   |           | 88.1596   |           | 147.0810  |
| 211.2630                                  |           | 228.0769  |           | 278.2800  |
| 323.2286                                  |           | 348.1811  |           | 379.4977  |
| 400.5734                                  |           | 514.3736  |           | 524.6588  |
| 557.5784                                  |           | 613.5478  |           | 642.0341  |
| 700.0667                                  |           | 792.8711  |           | 1007.5044 |
| 1164.5180                                 |           | 1264.7544 |           | 1279.1357 |
| 1298.8124                                 |           | 1306.6746 |           | 1359.8392 |
| 1430.6224                                 |           | 1453.2474 |           | 3814.6291 |
| Zero-point correction (Hartree): 0.050482 |           |           |           |           |

CF2CFCF2OH

-----

E(RM062X/CC-pVDZ) (Hartree): -689.13327169

Electronic state : 1-A

Cartesian coordinates (Angs):

|                                           |           |           |           |           |
|-------------------------------------------|-----------|-----------|-----------|-----------|
| C                                         | 1.130387  | -0.155677 | -0.013341 |           |
| C                                         | -0.237318 | 0.471407  | 0.012577  |           |
| C                                         | -1.411410 | -0.144718 | -0.006079 |           |
| F                                         | -0.194039 | 1.815783  | 0.032421  |           |
| F                                         | 1.667032  | -0.092489 | 1.234137  |           |
| F                                         | 1.050162  | -1.447904 | -0.344061 |           |
| F                                         | -1.572666 | -1.441633 | -0.024193 |           |
| F                                         | -2.554524 | 0.495258  | -0.004832 |           |
| O                                         | 1.955663  | 0.450639  | -0.905135 |           |
| H                                         | 1.901059  | 1.407668  | -0.759111 |           |
| Rotational constants (GHz):               | 2.5271100 |           | 1.2794000 | 1.0000900 |
| Vibrational harmonic frequencies (cm-1):  |           |           |           |           |
| 39.3905                                   |           | 129.6122  |           | 163.7252  |
| 237.8446                                  |           | 260.9031  |           | 293.8011  |
| 372.3207                                  |           | 380.1755  |           | 478.6689  |
| 514.6170                                  |           | 583.7531  |           | 609.4401  |
| 666.6879                                  |           | 686.9422  |           | 786.5067  |
| 1058.5628                                 |           | 1153.0456 |           | 1218.6495 |
| 1289.1613                                 |           | 1373.2415 |           | 1403.4459 |
| 1477.1091                                 |           | 1919.5303 |           | 3830.8603 |
| Zero-point correction (Hartree): 0.047677 |           |           |           |           |

\*\*\*\*\*  
 CF3OCF=CF2 + Cl : M06-2X/cc-pVDZ geometry  
 \*\*\*\*\*

CF3OCFCF2

-----  
 E(RM062X/CC-pVDZ) (Hartree): -788.35463805  
 Electronic state : 1-A  
 Cartesian coordinates (Angs):  
 C 1.672616 -0.287932 -0.068459  
 C 0.694091 0.564996 -0.335089  
 O -0.488561 0.168681 -0.874721  
 F 0.823924 1.869870 -0.148821  
 C -1.471733 -0.111240 0.043085  
 F -1.683853 0.918544 0.854497  
 F -1.141887 -1.159607 0.790339  
 F -2.570402 -0.380072 -0.628547  
 F 1.566372 -1.581829 -0.246295  
 F 2.843472 0.072607 0.396666  
 Rotational constants (GHz): 2.3475600 0.9395300 0.7772000  
 Vibrational harmonic frequencies (cm-1):  
 42.7445 67.2912 118.5448  
 192.6827 210.7831 341.5436  
 369.1534 452.4712 469.3770  
 546.3894 554.7824 607.0276  
 641.9512 652.4408 726.3140  
 856.0562 946.8563 1225.8433  
 1270.7324 1303.7518 1382.7947  
 1388.7653 1429.0729 1961.5734  
 Zero-point correction (Hartree): 0.040458

Cl

-----  
 E(UM062X/CC-pVDZ) (Hartree): -460.12141082  
 Point group : OH  
 Cartesian coordinates (Angs):  
 Cl 0.000000 0.000000 0.000000  
 Zero-point correction (Hartree): 0.000000

CF3OCFCF2Cl

-----  
 E(UM062X/CC-pVDZ) (Hartree): -1248.52010876  
 Electronic state : 2-A  
 Cartesian coordinates (Angs):  
 C 1.169693 -0.358406 -0.014712  
 C 0.279604 0.718444 -0.580233  
 O -0.976187 0.397586 -0.970858  
 F 0.385550 1.889082 0.023170  
 C -1.870659 -0.059709 -0.021859  
 F -1.799266 0.657819 1.091094  
 F -1.627993 -1.327747 0.283720  
 F -3.074623 0.038479 -0.541604  
 F 1.012173 -1.471282 -0.730603  
 F 0.841879 -0.638347 1.260388  
 Cl 2.864600 0.157959 -0.059281  
 Rotational constants (GHz): 1.9522300 0.6495700 0.5887900  
 Vibrational harmonic frequencies (cm-1):  
 41.2676 60.3426 100.3693  
 154.3055 177.1877 209.7793  
 272.9062 339.4980 367.3236  
 436.4009 456.5008 499.3195  
 557.3173 602.5320 627.1769  
 646.2689 733.0174 766.8344  
 907.1656 1010.7153 1129.5933  
 1227.7668 1244.5698 1313.5165  
 1360.0125 1381.4091 1421.3548  
 Zero-point correction (Hartree): 0.041108
